# Supplementary material for: Archromones A–F, unusual polycyclic dearomatic geranylquinol derivatives from the roots of Arnebia euchroma
Source: Royal Society of Chemistry journal article supplement (doi:10.1039/d0ob01934h), 2020-01-01
Supplement: d0ob01934h1.pdf [file d0ob01934h1.pdf]

## Supporting Information

### Archromones A–F, Unusual Polycyclic Dearomatic Geranylquinol Derivatives from the Roots of *Arnebia euchroma*

Hai-Wei Yan, Xu Zhang, Ya-Nan Yang, Zi-Ming Feng, Jian-Shuang Jiang, and Pei-Cheng Zhang\*

State Key Laboratory of Bioactive Substance and Function of Natural Medicines, Institute of Materia Medica, Chinese Academy of Medical Sciences and Peking Union Medical College, Beijing 100050, China

Corresponding author. Tel: +86-10-63165231. Fax: +86-10-63017757. E-mail: [pczhang@imm.ac.cn](mailto:pczhang@imm.ac.cn)

#### Table of Contents

| Figures | Contents                                                               | Compounds | Page |
|---------|------------------------------------------------------------------------|-----------|------|
| S1      | The <sup>1</sup> H NMR spectrum in CD <sub>3</sub> OD (500 MHz)        | 1         | 4    |
| S2      | The <sup>13</sup> C NMR spectrum in CD <sub>3</sub> OD (125 MHz)       | 1         | 4    |
| S3      | The <sup>1</sup> H- <sup>1</sup> H COSY spectrum in CD <sub>3</sub> OD | 1         | 5    |
| S4      | The HSQC spectrum in CD <sub>3</sub> OD                                | 1         | 5    |
| S5      | The HMBC spectrum in CD <sub>3</sub> OD                                | 1         | 6    |
| S6      | The ROESY spectrum in CD <sub>3</sub> OD                               | 1         | 6    |
| S7      | The UV spectrum in H <sub>2</sub> O                                    | 1         | 7    |
| S8      | The ECD spectrum in H <sub>2</sub> O                                   | 1         | 7    |
| S9      | The IR spectrum                                                        | 1         | 8    |
| S10     | The HR-ESI-MS data                                                     | 1         | 8    |
| S11     | The <sup>1</sup> H NMR spectrum in CD <sub>3</sub> OD (500 MHz)        | 2         | 9    |
| S12     | The <sup>13</sup> C NMR spectrum in CD <sub>3</sub> OD (125 MHz)       | 2         | 9    |
| S13     | The <sup>1</sup> H- <sup>1</sup> H COSY spectrum in CD <sub>3</sub> OD | 2         | 10   |
| S14     | The HSQC spectrum in CD <sub>3</sub> OD                                | 2         | 10   |
| S15     | The HMBC spectrum in CD <sub>3</sub> OD                                | 2         | 11   |
| S16     | The ROESY spectrum in CD <sub>3</sub> OD                               | 2         | 11   |
| S17     | The UV spectrum in H <sub>2</sub> O                                    | 2         | 12   |
| S18     | The ECD spectrum in H <sub>2</sub> O                                   | 2         | 12   |
| S19     | The IR spectrum                                                        | 2         | 13   |
| S20     | The HR-ESI-MS data                                                     | 2         | 13   |
| S21     | The <sup>1</sup> H NMR spectrum in CD <sub>3</sub> OD (500 MHz)        | 3         | 14   |
| S22     | The <sup>13</sup> C NMR spectrum in CD <sub>3</sub> OD (125 MHz)       | 3         | 14   |
| S23     | The <sup>1</sup> H- <sup>1</sup> H COSY spectrum in CD <sub>3</sub> OD | 3         | 15   |
| S24     | The HSQC spectrum in CD <sub>3</sub> OD                                | 3         | 15   |
| S25     | The HMBC spectrum in CD <sub>3</sub> OD                                | 3         | 16   |
| S26     | The ROESY spectrum in CD <sub>3</sub> OD                               | 3         | 16   |
| S27     | The UV spectrum in H <sub>2</sub> O                                    | 3         | 17   |
| S28     | The ECD spectrum in MeOH                                               | 3         | 17   |

|            |                                                                      |          |           |
|------------|----------------------------------------------------------------------|----------|-----------|
| <b>S29</b> | The IR spectrum                                                      | <b>3</b> | <b>18</b> |
| <b>S30</b> | The HR-ESI-MS data                                                   | <b>3</b> | <b>18</b> |
| <b>S31</b> | The <sup>1</sup> H NMR spectrum in D <sub>2</sub> O (500 MHz)        | <b>4</b> | <b>19</b> |
| <b>S32</b> | The <sup>13</sup> C NMR spectrum in D <sub>2</sub> O (125 MHz)       | <b>4</b> | <b>19</b> |
| <b>S33</b> | The <sup>1</sup> H- <sup>1</sup> H COSY spectrum in D <sub>2</sub> O | <b>4</b> | <b>20</b> |
| <b>S34</b> | The HSQC spectrum in D <sub>2</sub> O                                | <b>4</b> | <b>20</b> |
| <b>S35</b> | The HMBC spectrum in D <sub>2</sub> O                                | <b>4</b> | <b>21</b> |
| <b>S36</b> | The ROESY spectrum in D <sub>2</sub> O                               | <b>4</b> | <b>21</b> |
| <b>S37</b> | The UV spectrum in H <sub>2</sub> O                                  | <b>4</b> | <b>22</b> |
| <b>S38</b> | The ECD spectrum in H <sub>2</sub> O                                 | <b>4</b> | <b>22</b> |
| <b>S39</b> | The IR spectrum                                                      | <b>4</b> | <b>23</b> |
| <b>S40</b> | The HR-ESI-MS data                                                   | <b>4</b> | <b>23</b> |
| <b>S41</b> | The <sup>1</sup> H NMR spectrum in D <sub>2</sub> O (500 MHz)        | <b>5</b> | <b>24</b> |
| <b>S42</b> | The <sup>13</sup> C NMR spectrum in D <sub>2</sub> O (125 MHz)       | <b>5</b> | <b>24</b> |
| <b>S43</b> | The <sup>1</sup> H- <sup>1</sup> H COSY spectrum in D <sub>2</sub> O | <b>5</b> | <b>25</b> |
| <b>S44</b> | The HSQC spectrum in D <sub>2</sub> O                                | <b>5</b> | <b>25</b> |
| <b>S45</b> | The HMBC spectrum in D <sub>2</sub> O                                | <b>5</b> | <b>26</b> |
| <b>S46</b> | The ROESY spectrum in D <sub>2</sub> O                               | <b>5</b> | <b>26</b> |
| <b>S47</b> | The UV spectrum in H <sub>2</sub> O                                  | <b>5</b> | <b>27</b> |
| <b>S48</b> | The ECD spectrum in H <sub>2</sub> O                                 | <b>5</b> | <b>27</b> |
| <b>S49</b> | The IR spectrum                                                      | <b>5</b> | <b>28</b> |
| <b>S50</b> | The HR-ESI-MS data                                                   | <b>5</b> | <b>28</b> |
| <b>S51</b> | The <sup>1</sup> H NMR spectrum in D <sub>2</sub> O (500 MHz)        | <b>6</b> | <b>29</b> |
| <b>S52</b> | The <sup>13</sup> C NMR spectrum in D <sub>2</sub> O (125 MHz)       | <b>6</b> | <b>29</b> |
| <b>S53</b> | The <sup>1</sup> H- <sup>1</sup> H COSY spectrum in D <sub>2</sub> O | <b>6</b> | <b>30</b> |
| <b>S54</b> | The HSQC spectrum in D <sub>2</sub> O                                | <b>6</b> | <b>30</b> |
| <b>S55</b> | The HMBC spectrum in D <sub>2</sub> O                                | <b>6</b> | <b>31</b> |
| <b>S56</b> | The ROESY spectrum in D <sub>2</sub> O                               | <b>6</b> | <b>31</b> |
| <b>S57</b> | The UV spectrum in H <sub>2</sub> O                                  | <b>6</b> | <b>32</b> |
| <b>S58</b> | The ECD spectrum in H <sub>2</sub> O                                 | <b>6</b> | <b>32</b> |
| <b>S59</b> | The IR spectrum                                                      | <b>6</b> | <b>33</b> |
| <b>S60</b> | The HR-ESI-MS data                                                   | <b>6</b> | <b>33</b> |
| <b>S61</b> | The <sup>1</sup> H NMR spectrum in CD <sub>3</sub> OD (500 MHz)      | <b>7</b> | <b>34</b> |
| <b>S62</b> | The <sup>13</sup> C NMR spectrum in CD <sub>3</sub> OD (125 MHz)     | <b>7</b> | <b>34</b> |
| <b>S63</b> | The HSQC spectrum in CD <sub>3</sub> OD                              | <b>7</b> | <b>35</b> |
| <b>S64</b> | The HMBC spectrum in CD <sub>3</sub> OD                              | <b>7</b> | <b>35</b> |
| <b>S65</b> | The ROESY spectrum in CD <sub>3</sub> OD                             | <b>7</b> | <b>36</b> |
| <b>S66</b> | The UV spectrum in MeOH                                              | <b>7</b> | <b>36</b> |
| <b>S67</b> | The ECD spectrum in MeOH                                             | <b>7</b> | <b>37</b> |
| <b>S68</b> | The IR spectrum                                                      | <b>7</b> | <b>37</b> |
| <b>S69</b> | The HR-ESI-MS data                                                   | <b>7</b> | <b>38</b> |

|            |                                                                        |                   |              |
|------------|------------------------------------------------------------------------|-------------------|--------------|
| <b>S70</b> | The <sup>1</sup> H NMR spectrum in D <sub>2</sub> O (500 MHz)          | <b>8</b>          | <b>38</b>    |
| <b>S71</b> | The <sup>13</sup> C NMR spectrum in D <sub>2</sub> O (125 MHz)         | <b>8</b>          | <b>39</b>    |
| <b>S72</b> | The HSQC spectrum in D <sub>2</sub> O                                  | <b>8</b>          | <b>39</b>    |
| <b>S73</b> | The HMBC spectrum in D <sub>2</sub> O                                  | <b>8</b>          | <b>40</b>    |
| <b>S74</b> | The 1D-NOESY spectrum in D <sub>2</sub> O                              | <b>8</b>          | <b>40</b>    |
| <b>S75</b> | The UV spectrum in H <sub>2</sub> O                                    | <b>8</b>          | <b>41</b>    |
| <b>S76</b> | The [Mo <sub>2</sub> (OAc) <sub>4</sub> ] induced ECD spectrum in DMSO | <b>8</b>          | <b>41</b>    |
| <b>S77</b> | The IR spectrum                                                        | <b>8</b>          | <b>42</b>    |
| <b>S78</b> | The HR-ESI-MS data                                                     | <b>8</b>          | <b>42</b>    |
| —          | The cytotoxic activities of <b>1–8</b>                                 | <b>1–8</b>        | <b>43</b>    |
| —          | General Experimental Procedures                                        | <b>1–8</b>        | <b>43</b>    |
| —          | Determination of the Absolute Configuration of Sugar                   | <b>7</b>          | <b>44</b>    |
| <b>S79</b> | The Gas Chromatographic separation of D-Glu                            | <b>D-Glu</b>      | <b>44</b>    |
| <b>S80</b> | The Gas Chromatographic analysis of sugar moiety of compound <b>7</b>  | <b>7</b>          | <b>44</b>    |
| —          | X-ray Crystallographic Analyses                                        | <b>1, 3, 4, 5</b> | <b>45</b>    |
| —          | ECD Calculation Details                                                | <b>6, 7</b>       | <b>46–49</b> |

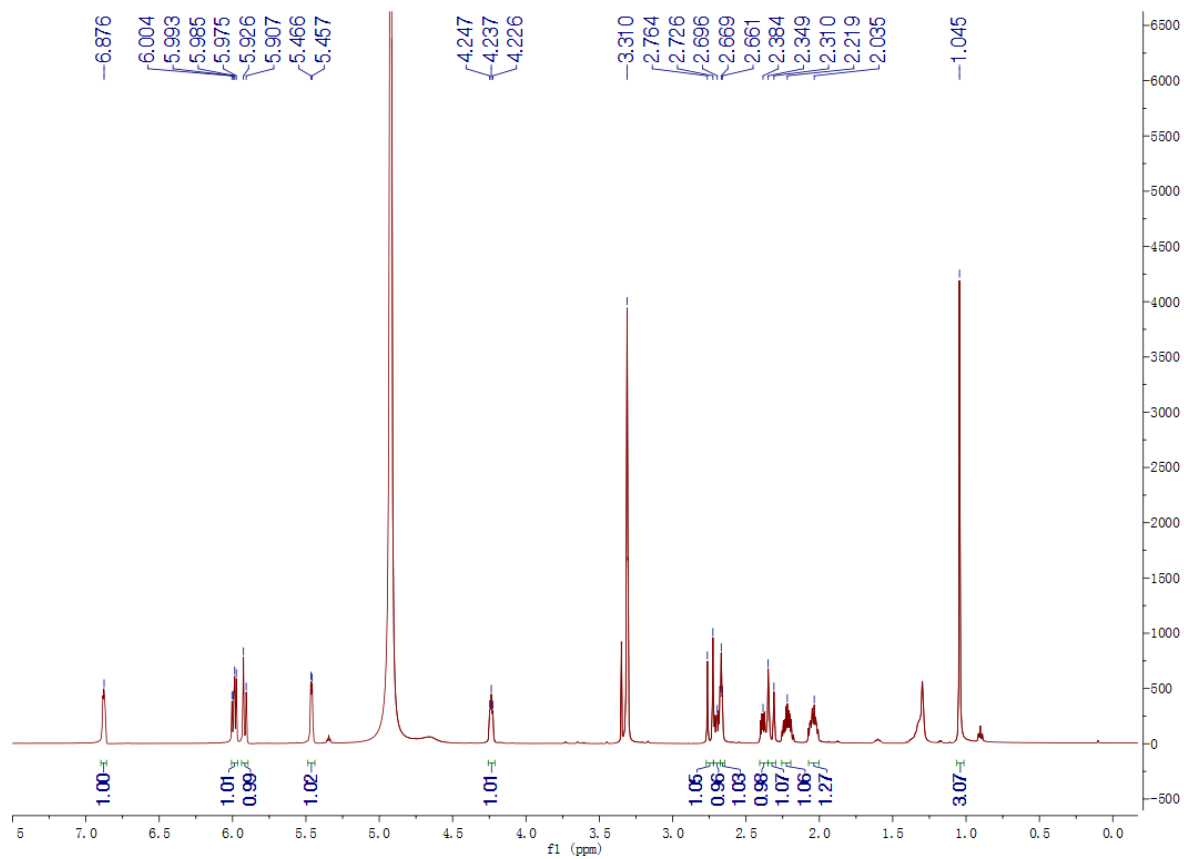

Figure S1. The  $^1\text{H}$  NMR spectrum of compound **1** in  $\text{CD}_3\text{OD}$

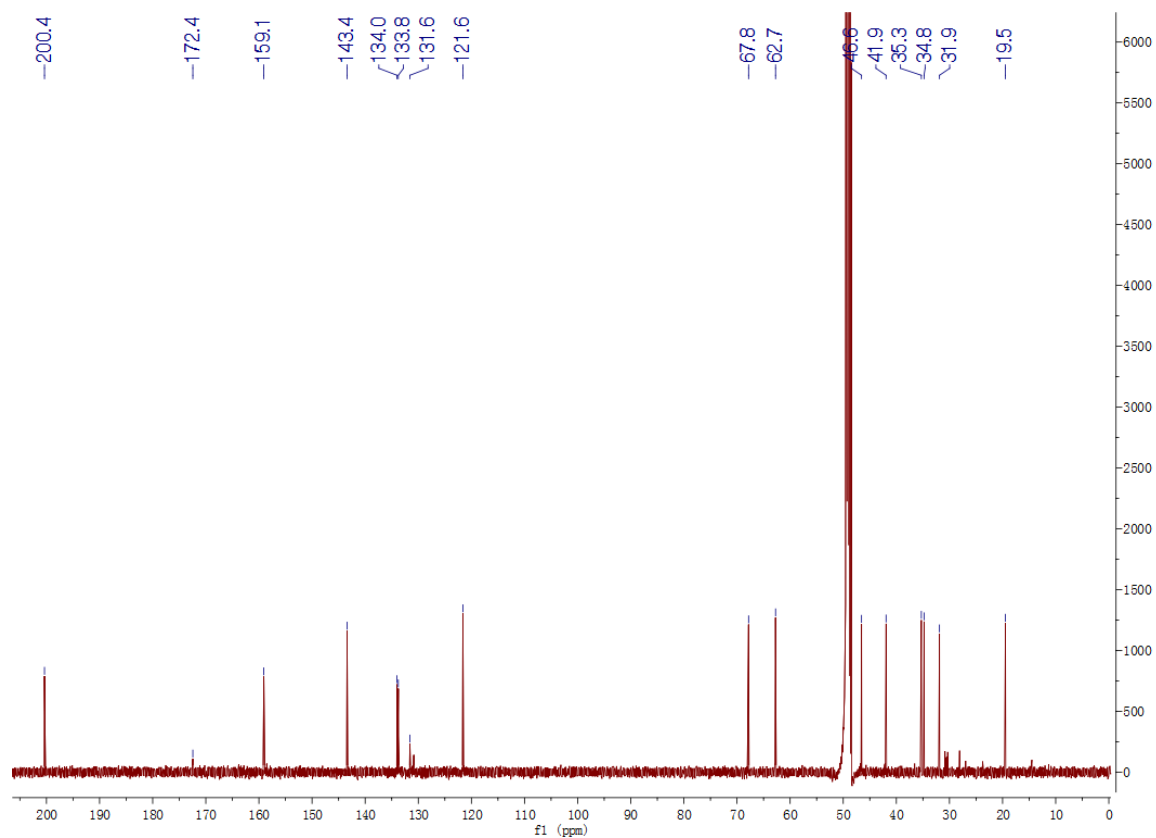

Figure S2. The  $^{13}\text{C}$  NMR spectrum of compound **1** in  $\text{CD}_3\text{OD}$

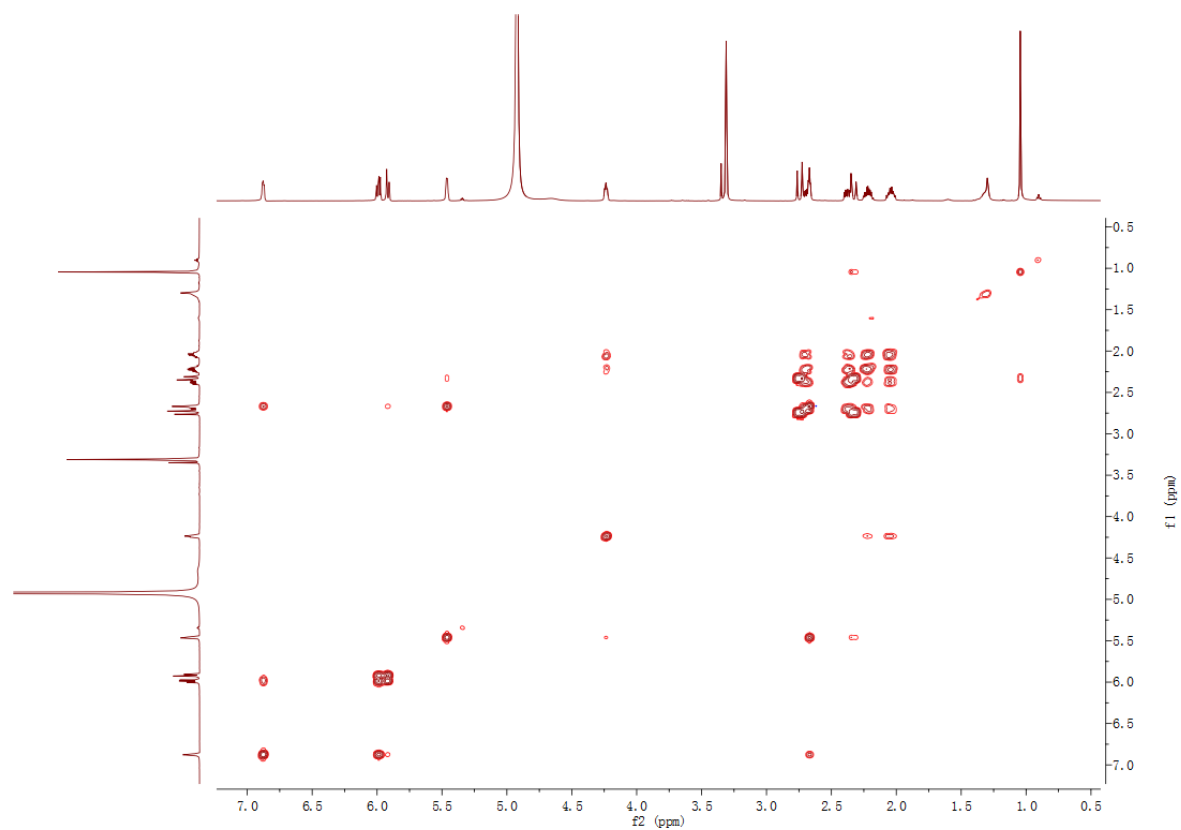

**Figure S3.** The  $^1\text{H}$ - $^1\text{H}$  COSY spectrum of compound **1** in  $\text{CD}_3\text{OD}$

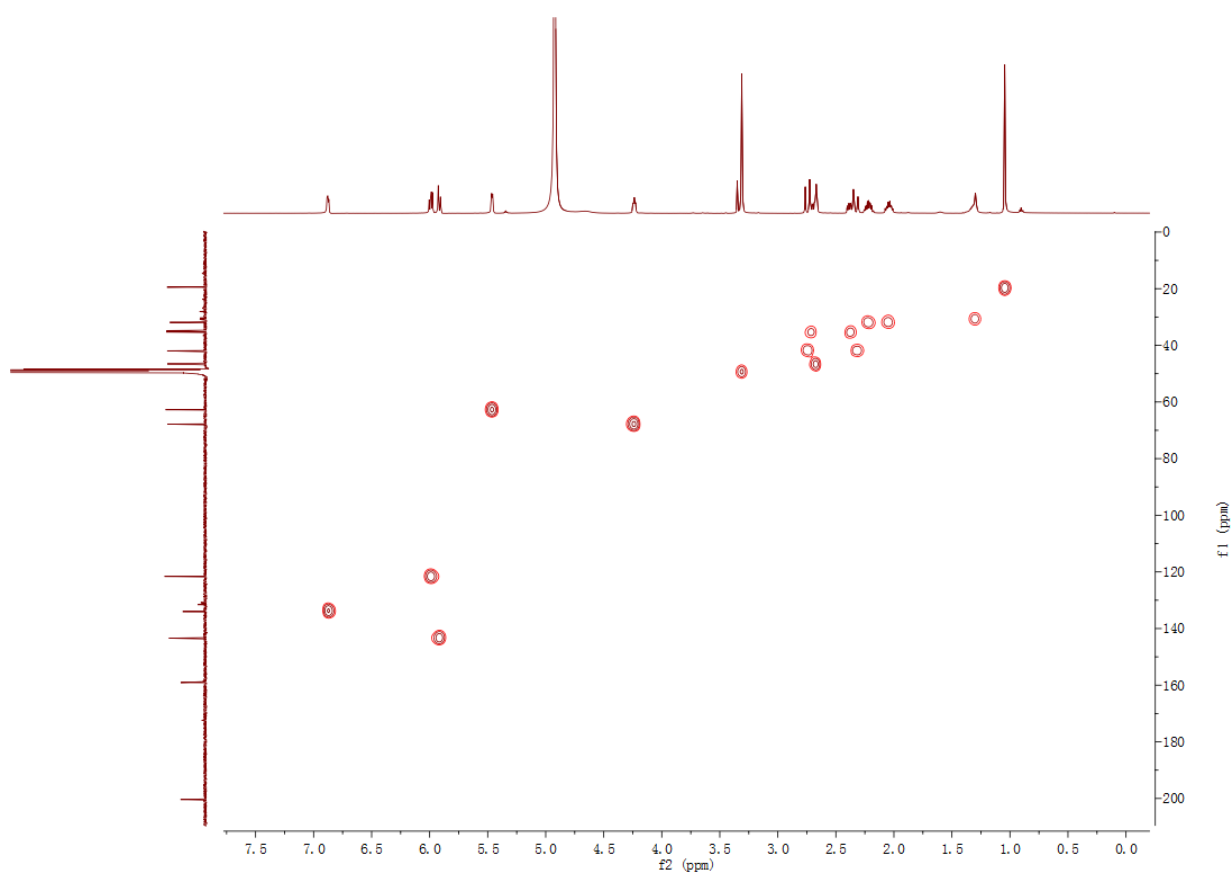

**Figure S4.** The HSQC spectrum of compound **1** in  $\text{CD}_3\text{OD}$

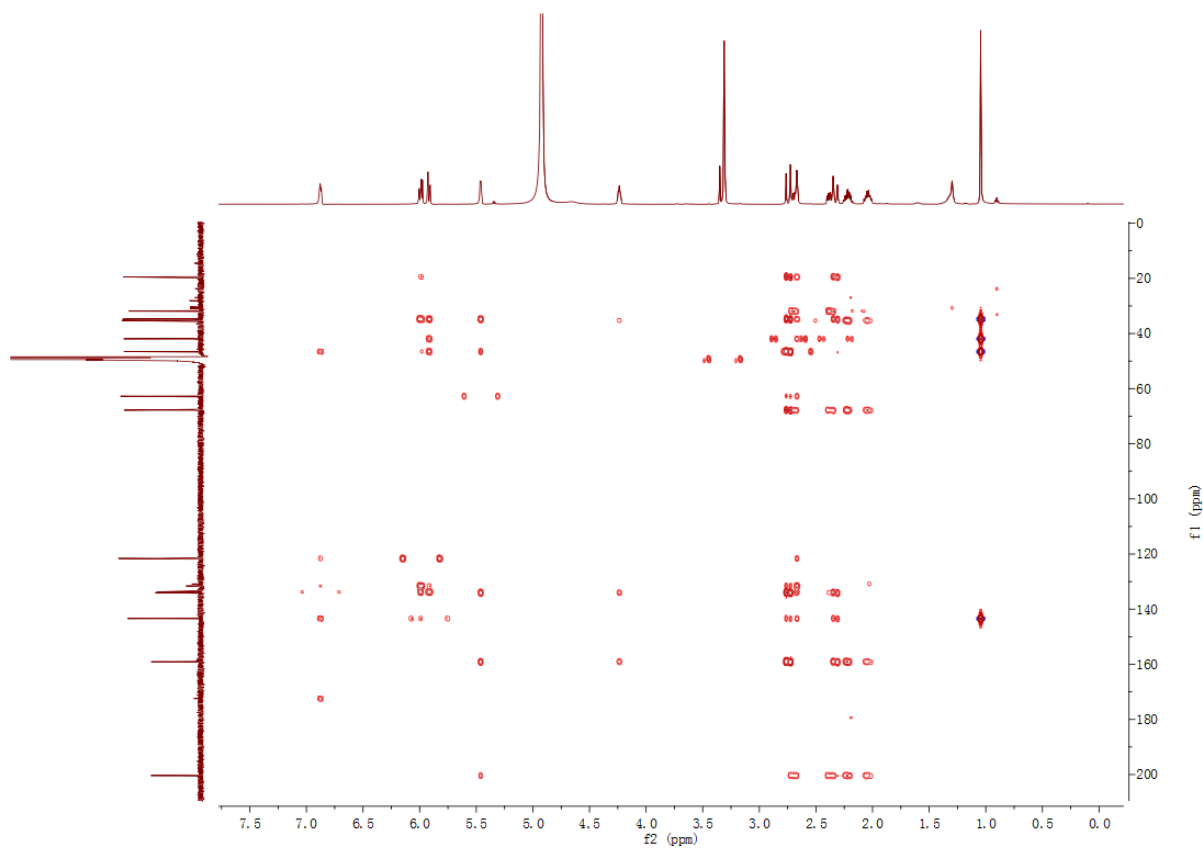

**Figure S5.** The HMBC spectrum of compound **1** in CD<sub>3</sub>OD

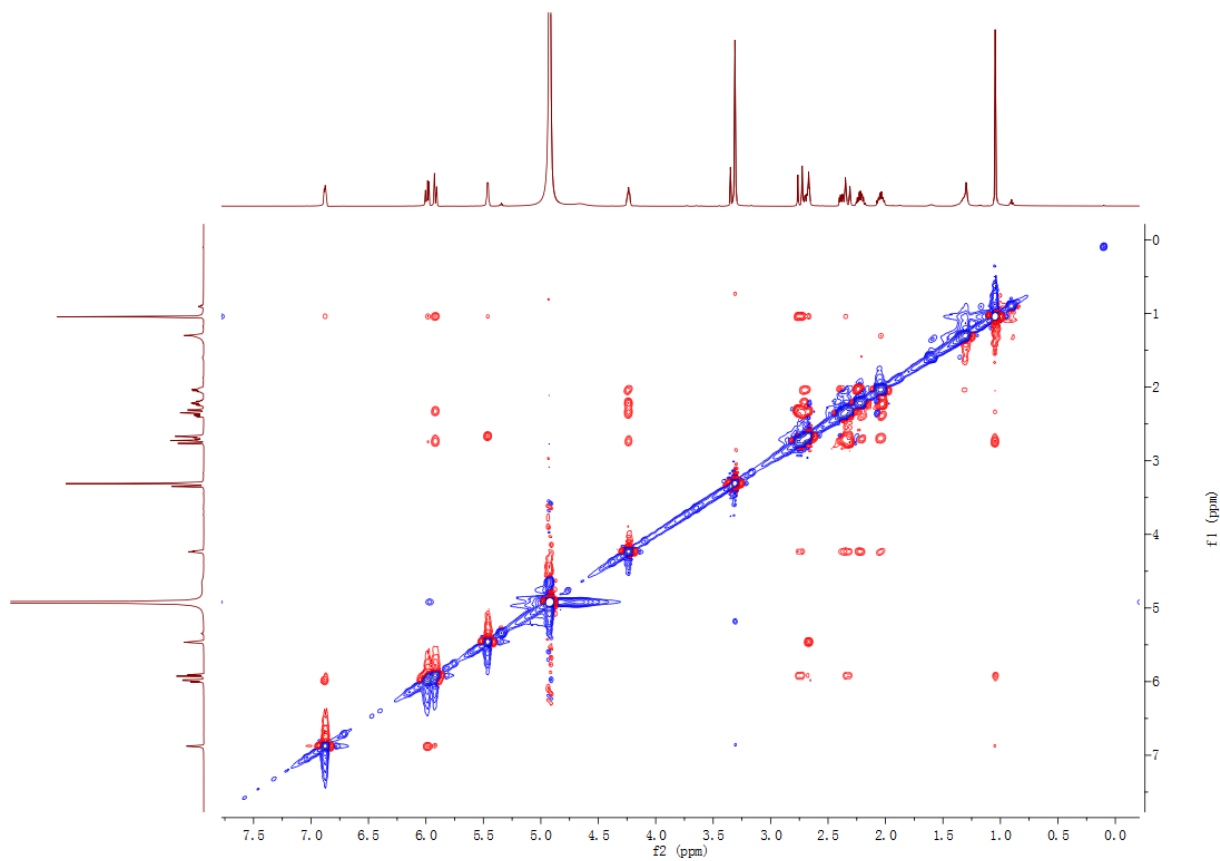

**Figure S6.** The ROESY spectrum of compound **1** in CD<sub>3</sub>OD

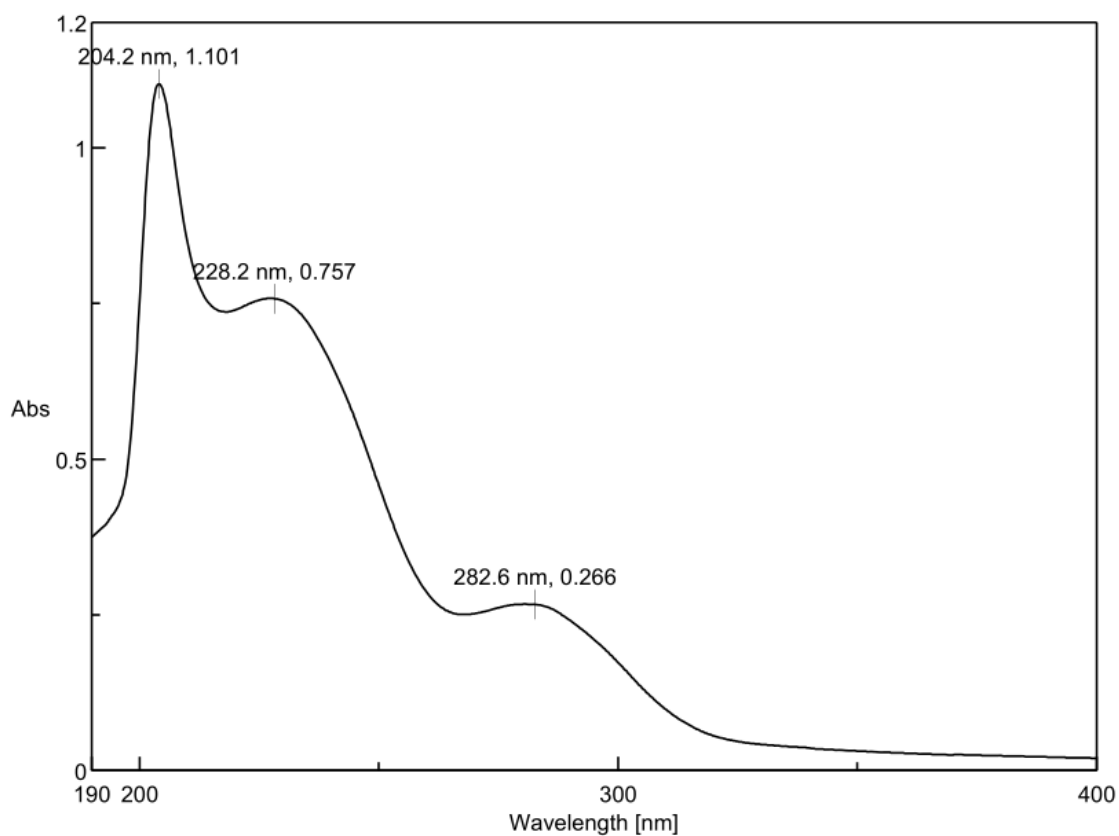

**Figure S7.** The UV spectrum of compound **1** in H<sub>2</sub>O

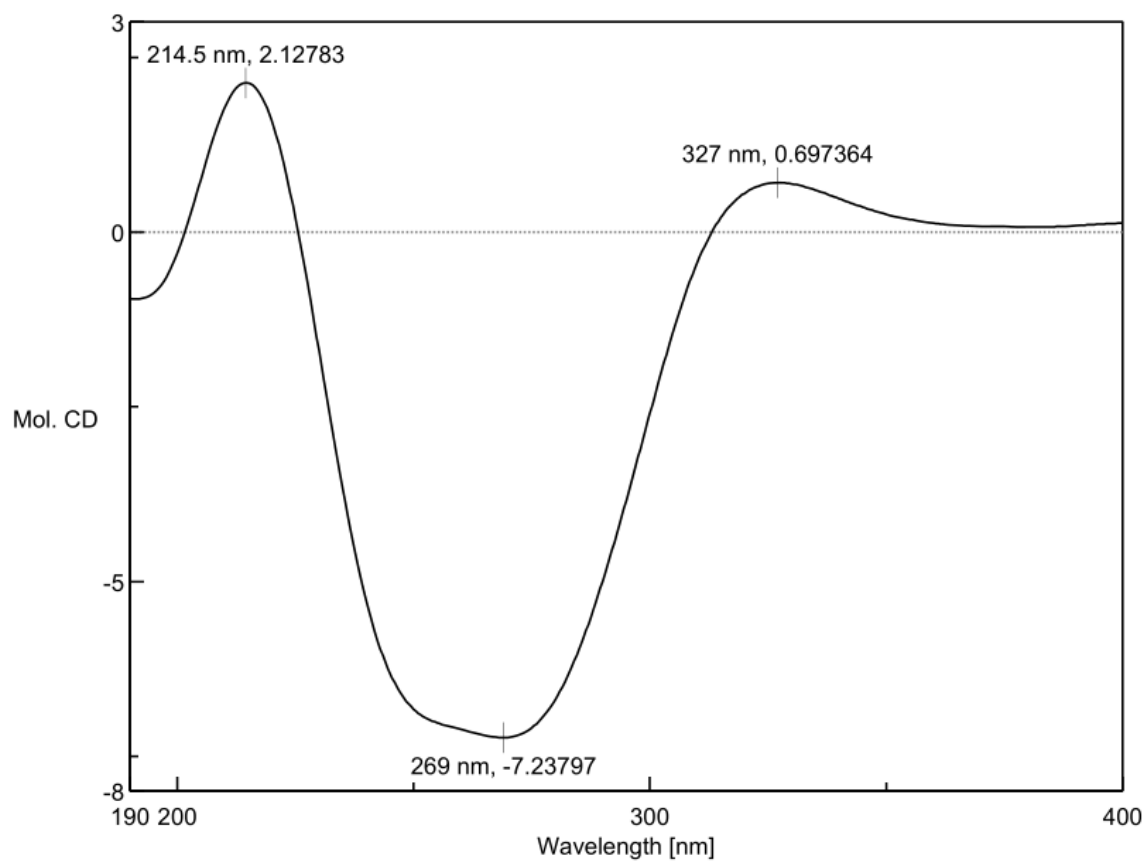

**Figure S8.** The ECD spectrum of compound **1** in H<sub>2</sub>O

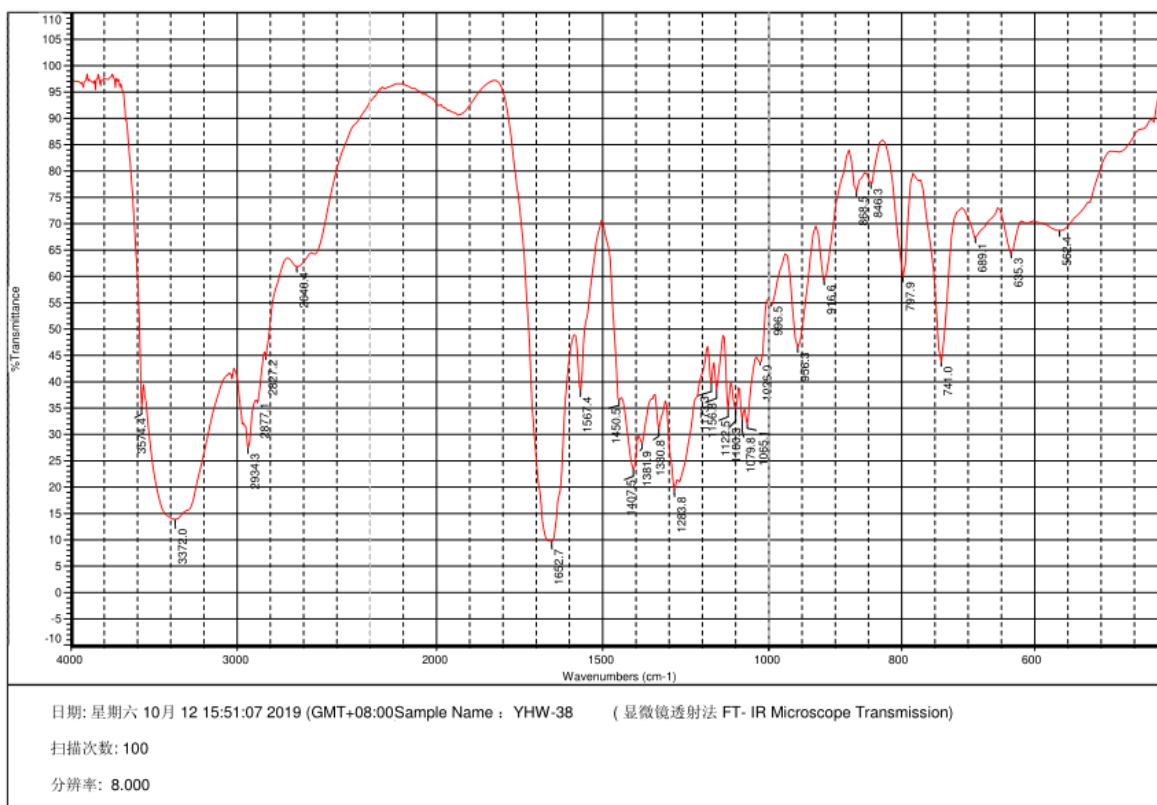

Figure S9. The IR spectrum of compound 1

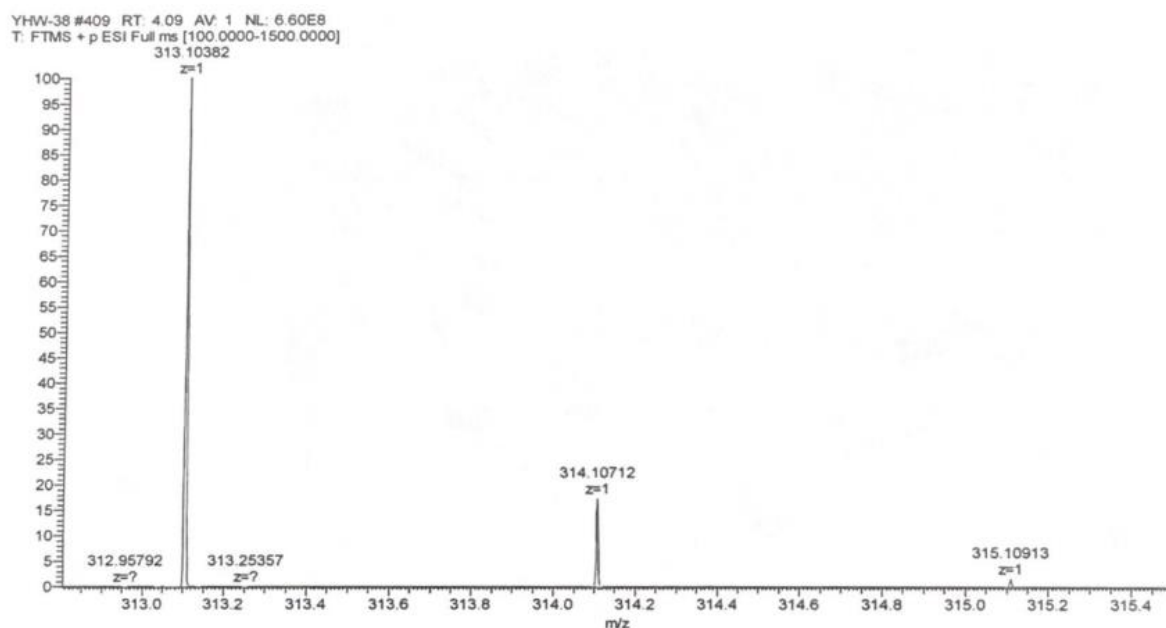

| m/z       | Theo. Mass | Delta (ppm) | RDB equiv. | Composition   |      |
|-----------|------------|-------------|------------|---------------|------|
| 313.10382 | 313.10464  | -2.63       | 7.5        | C16 H18 O5 Na | M+Na |

Figure S10. The HR-ESI-MS data of compound 1



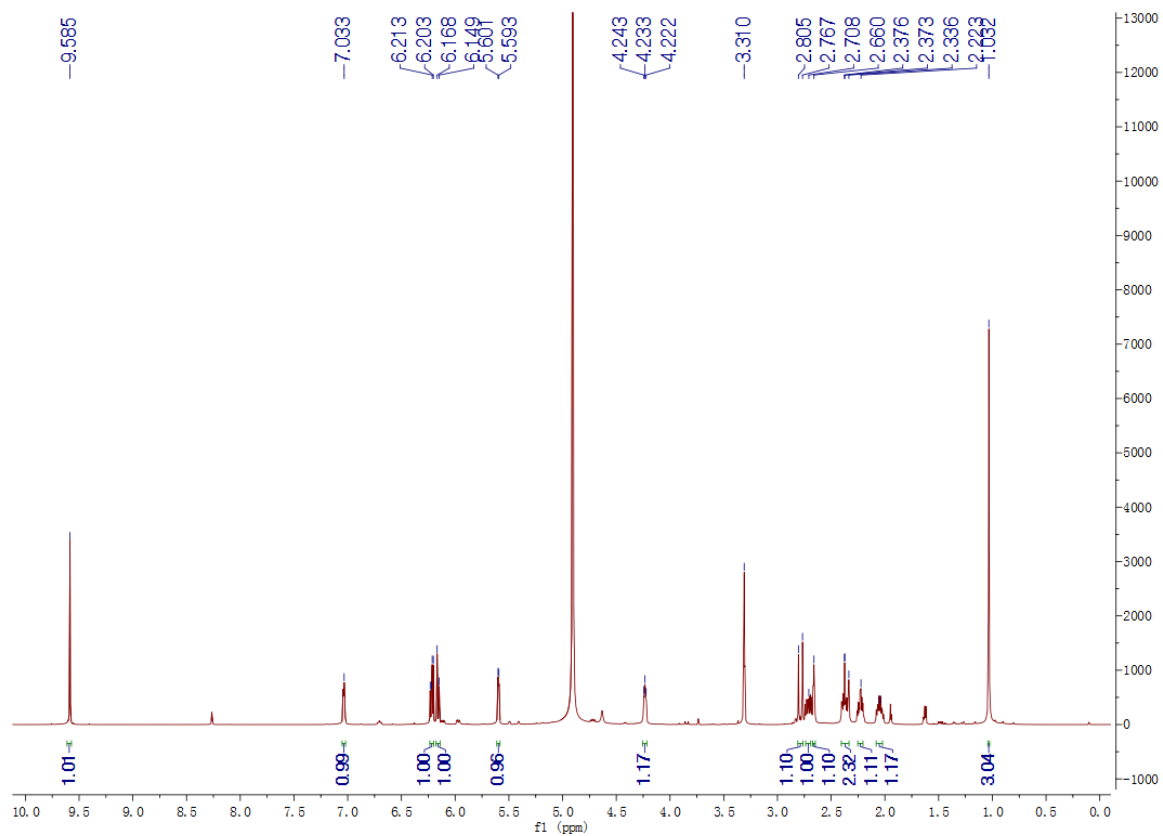

Figure S11. The  $^1\text{H}$  NMR spectrum of compound **2** in  $\text{CD}_3\text{OD}$

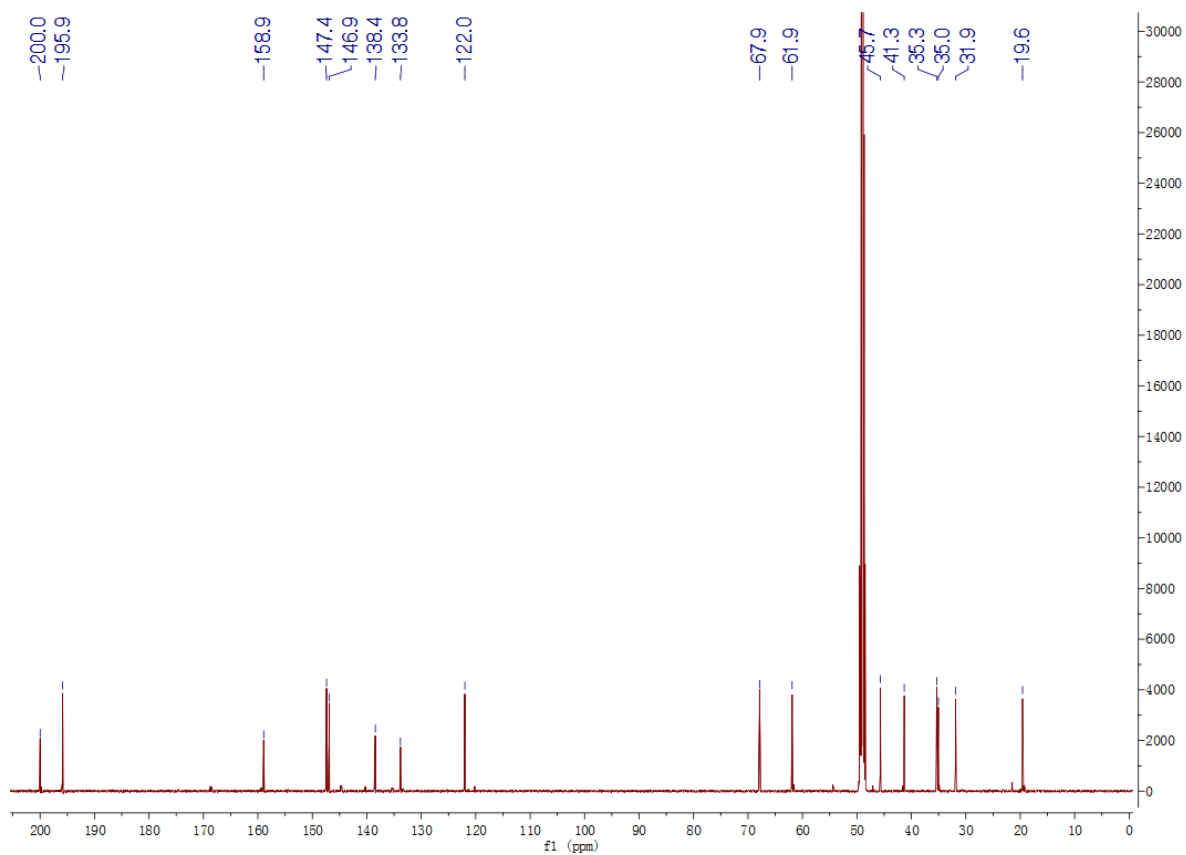

Figure S12. The  $^{13}\text{C}$  NMR spectrum of compound **2** in  $\text{CD}_3\text{OD}$

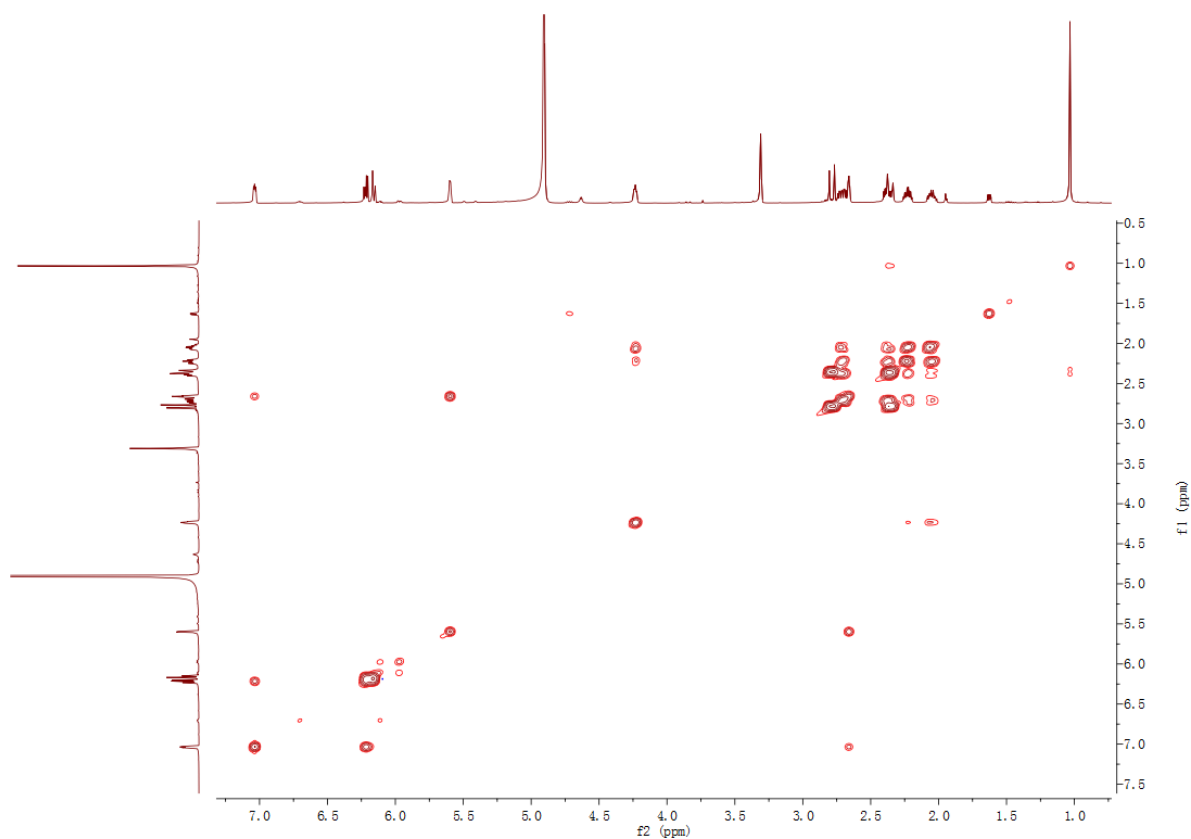

**Figure S13.** The  $^1\text{H}$ - $^1\text{H}$  COSY spectrum of compound **2** in  $\text{CD}_3\text{OD}$

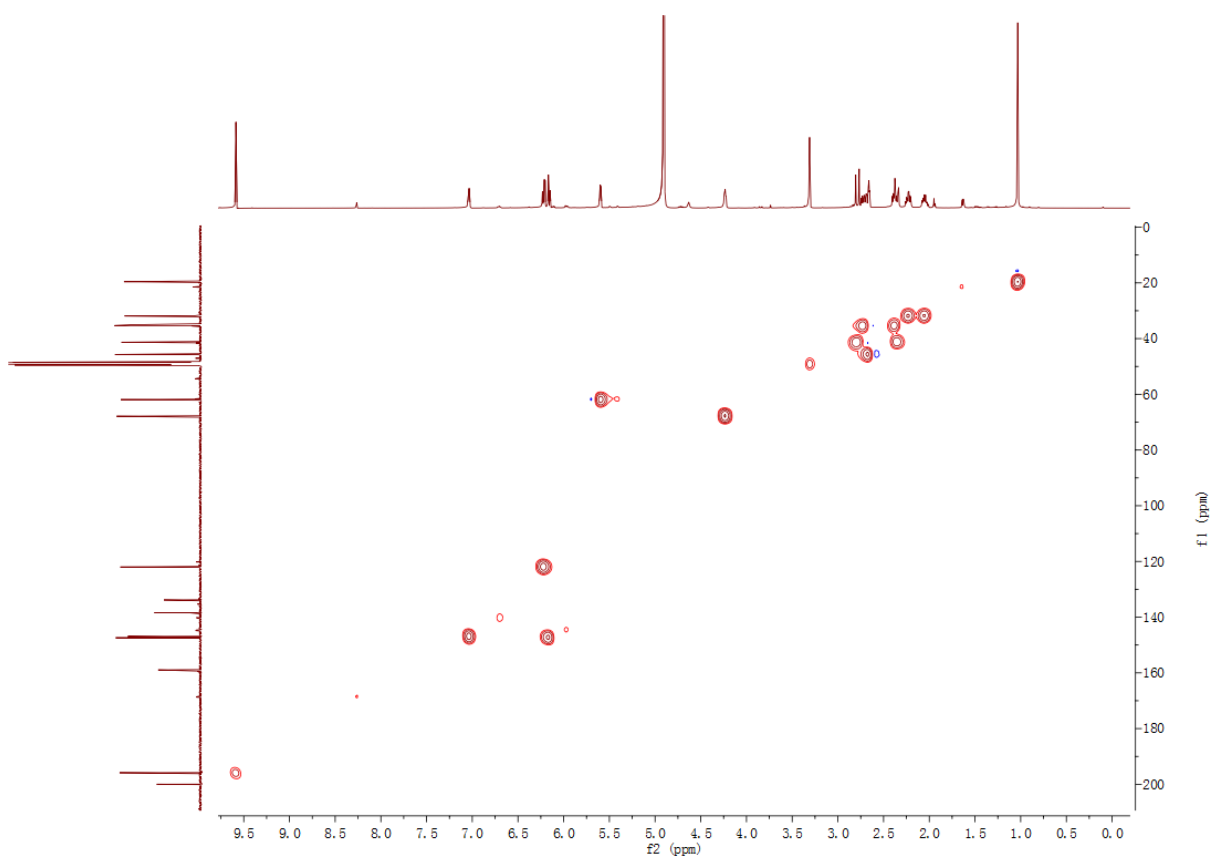

**Figure S14.** The HSQC spectrum of compound **2** in  $\text{CD}_3\text{OD}$

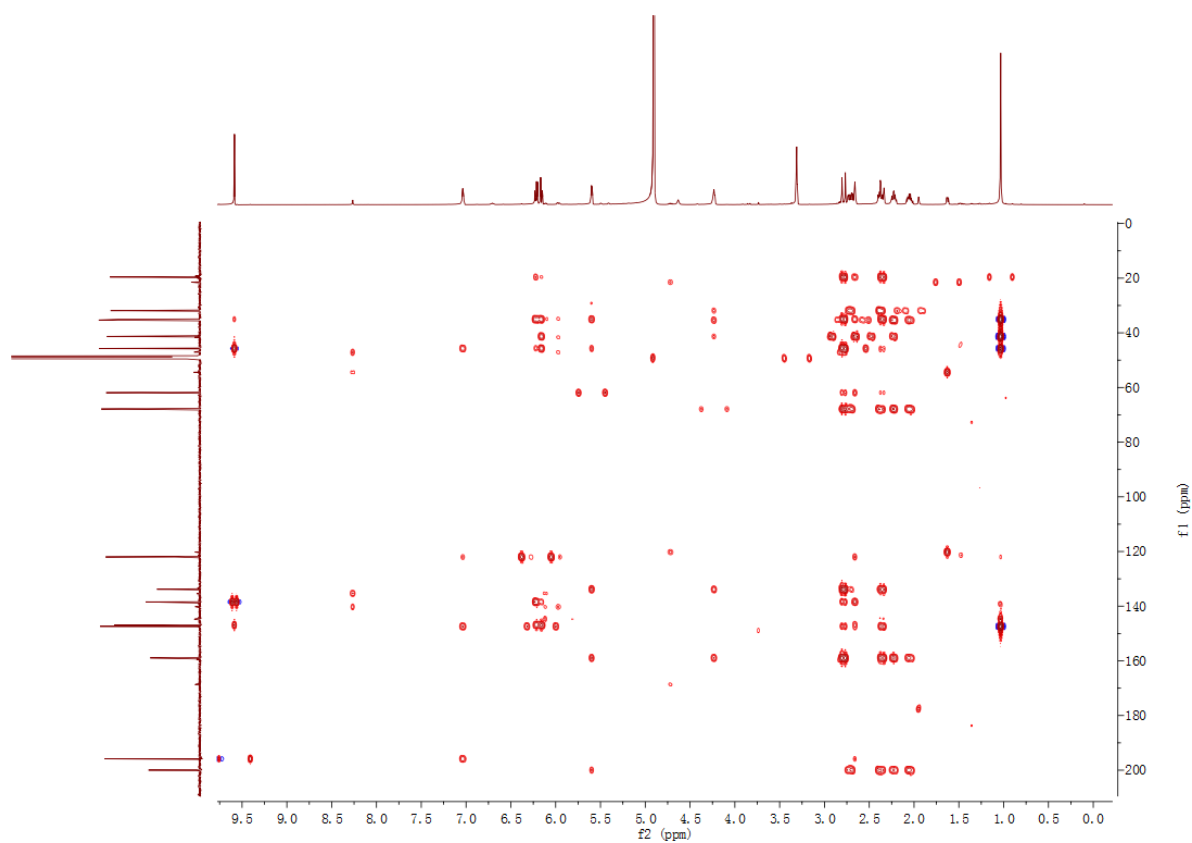

**Figure S15.** The HMBC spectrum of compound **2** in CD<sub>3</sub>OD

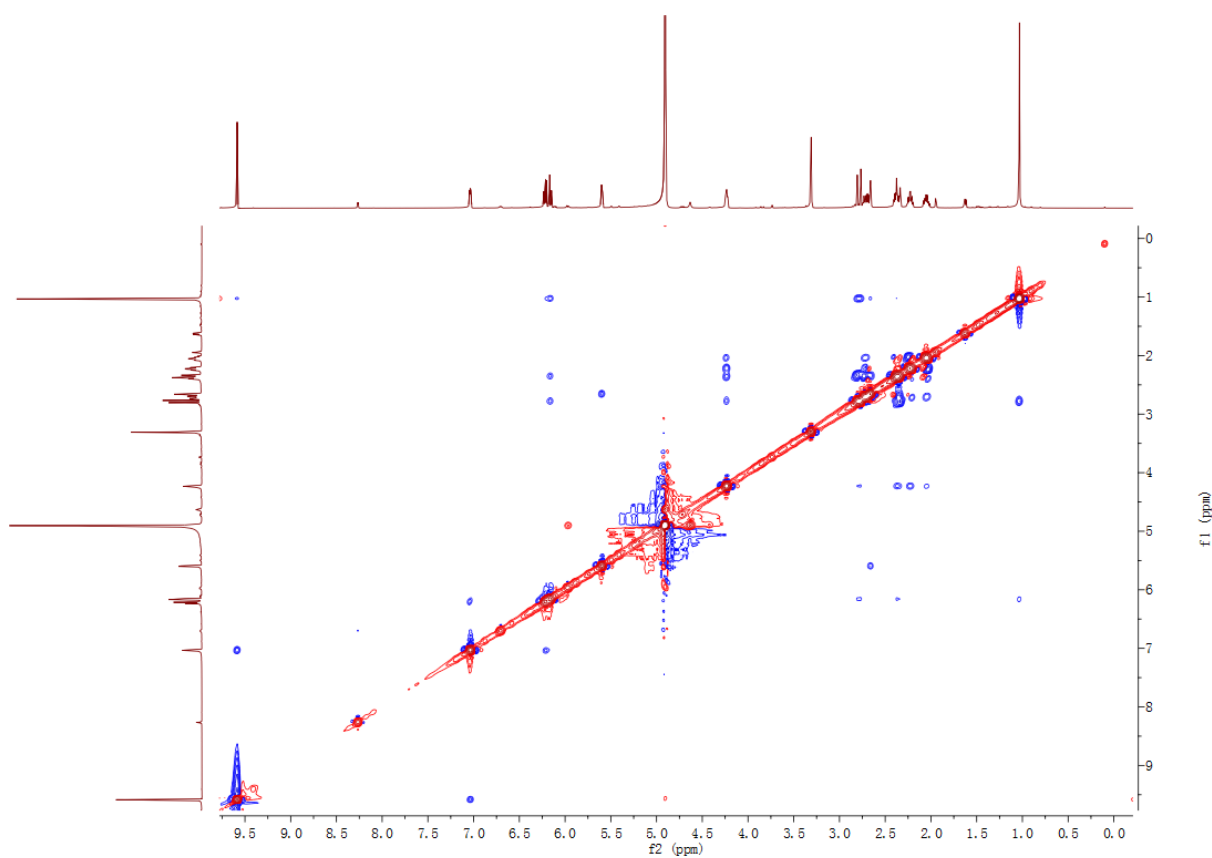

**Figure S16.** The ROESY spectrum of compound **2** in CD<sub>3</sub>OD

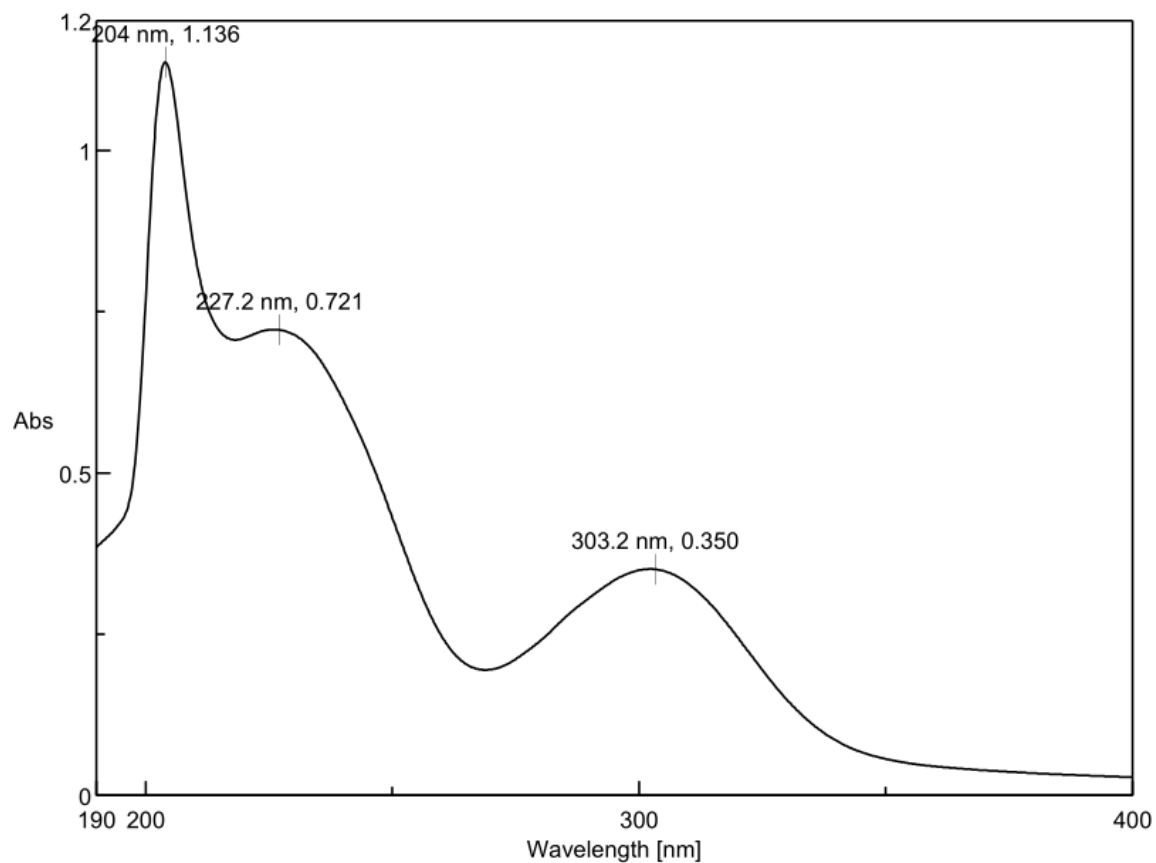

**Figure S17.** The UV spectrum of compound 2 in H<sub>2</sub>O

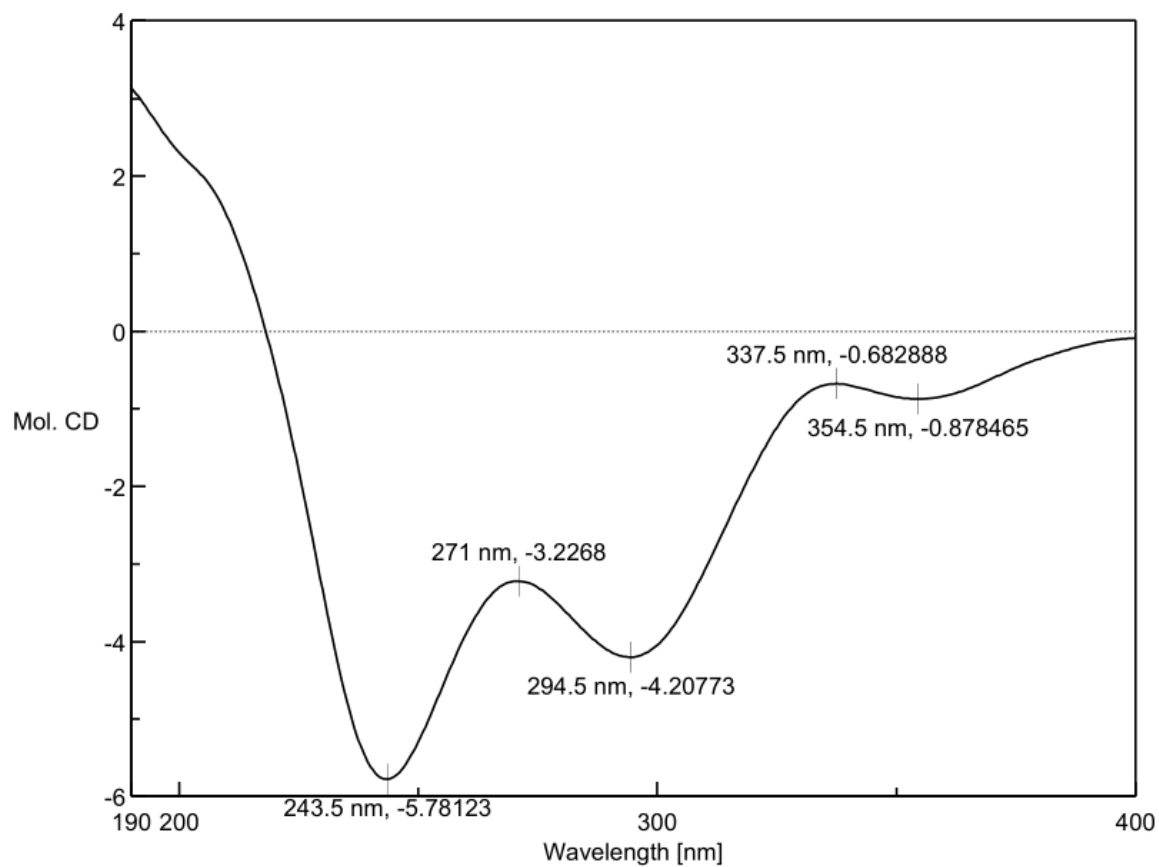

**Figure S18.** The ECD spectrum of compound 2 in H<sub>2</sub>O

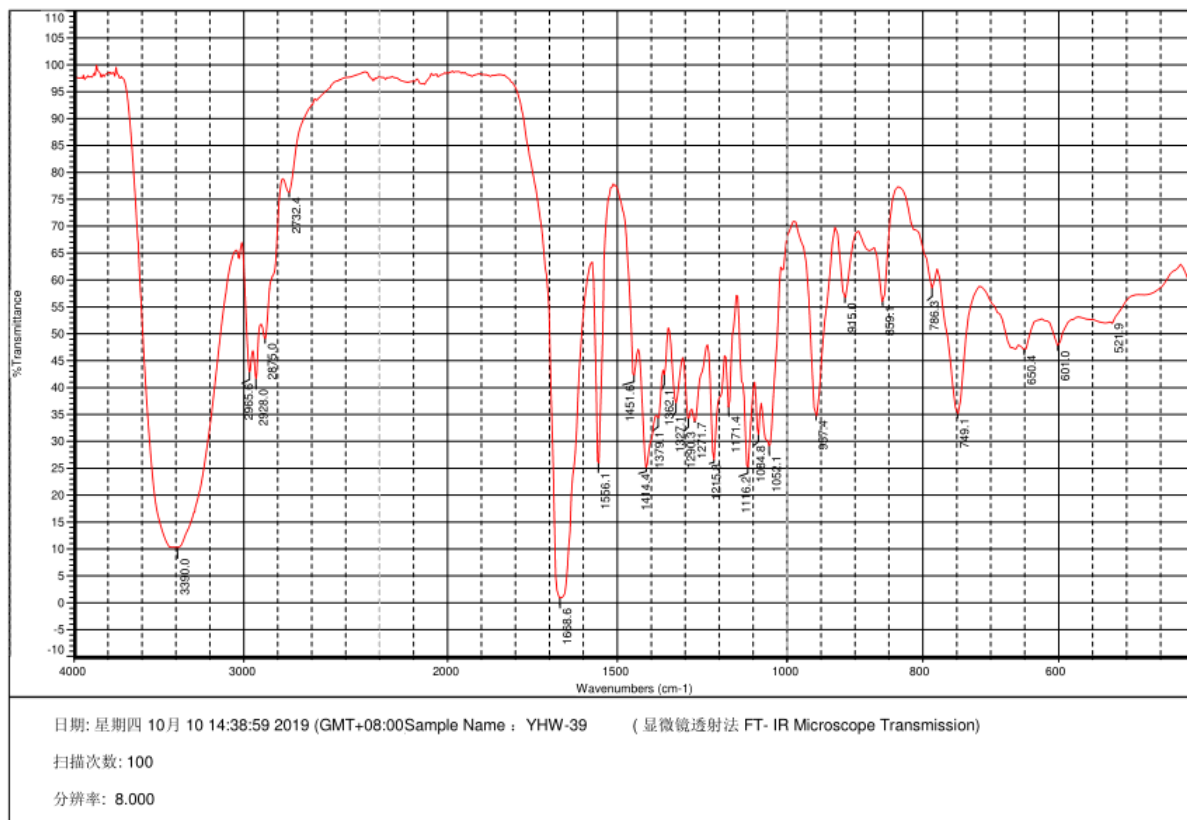

Figure S19. The IR spectrum of compound 2

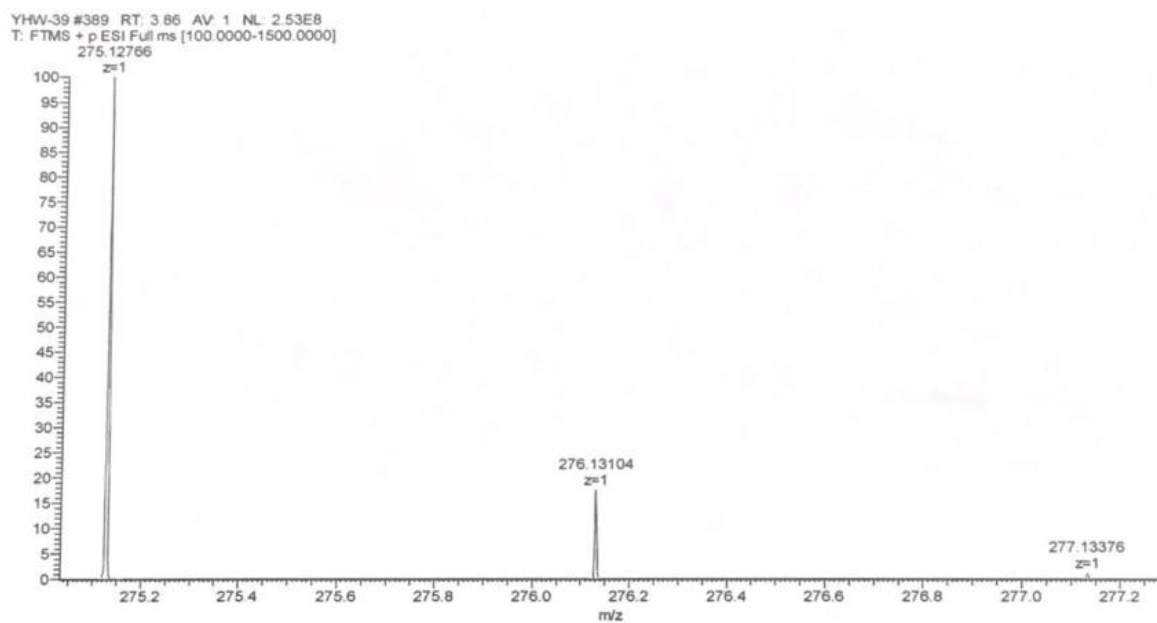

| m/z       | Theo. Mass | Delta (ppm) | RDB equiv. | Composition |     |
|-----------|------------|-------------|------------|-------------|-----|
| 275.12766 | 275.12779  | -0.46       | 7.5        | C16 H19 O4  | M+H |

Figure S20. The HR-ESI-MS data of compound 2

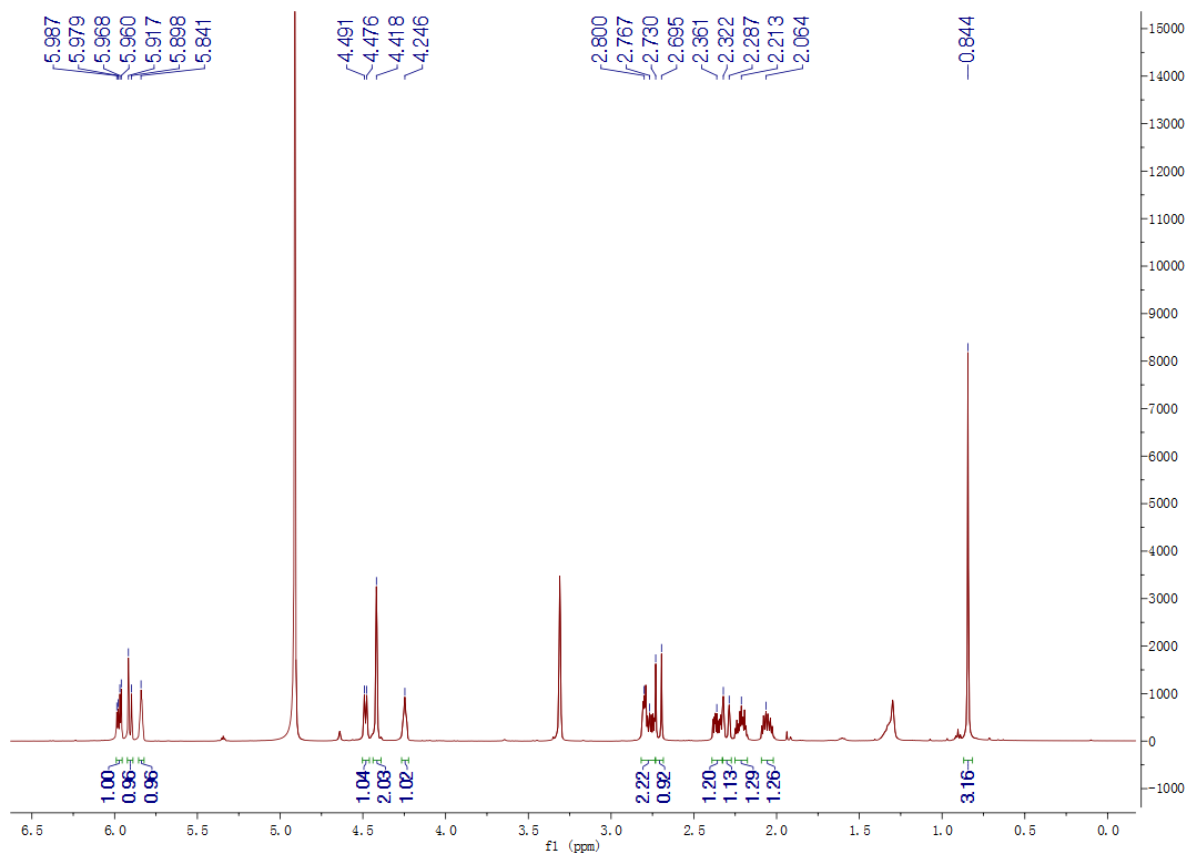

Figure S21. The  $^1\text{H}$  NMR spectrum of compound **3** in  $\text{CD}_3\text{OD}$

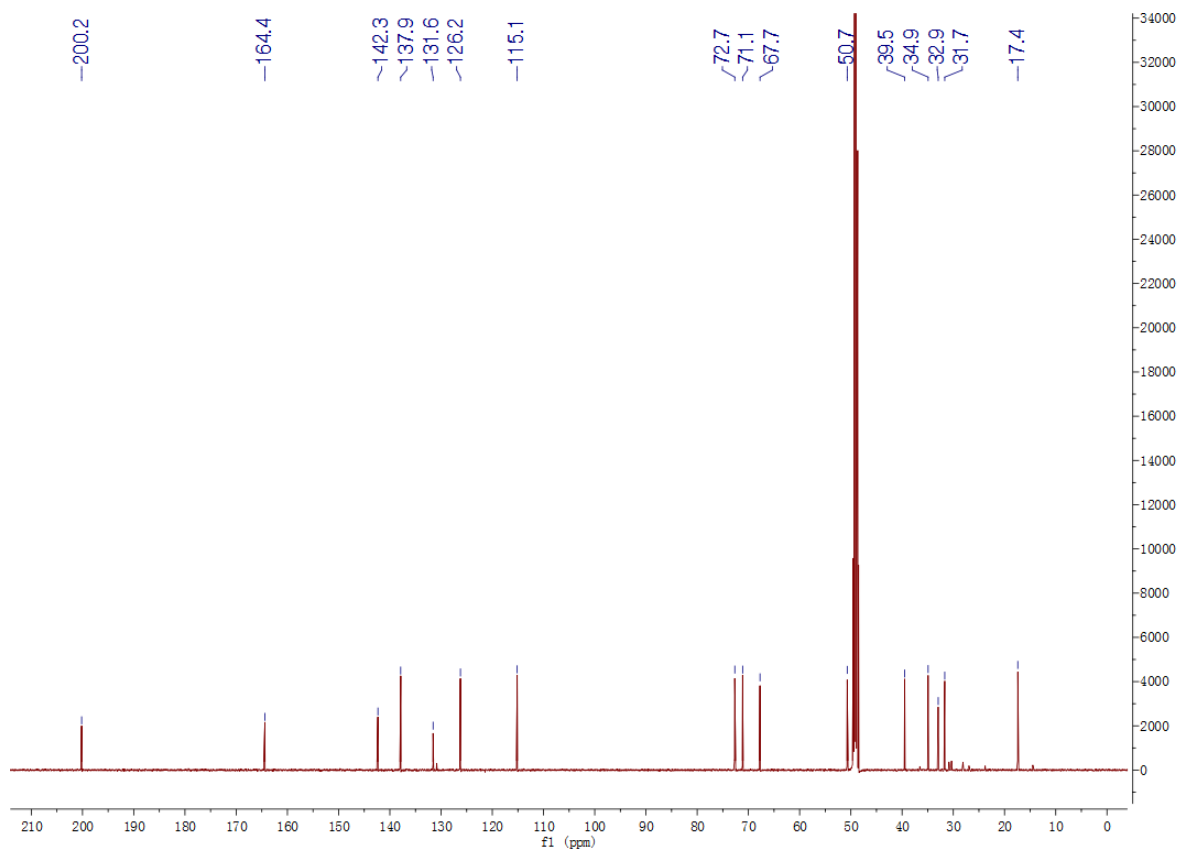

Figure S22. The  $^{13}\text{C}$  NMR spectrum of compound **3** in  $\text{CD}_3\text{OD}$

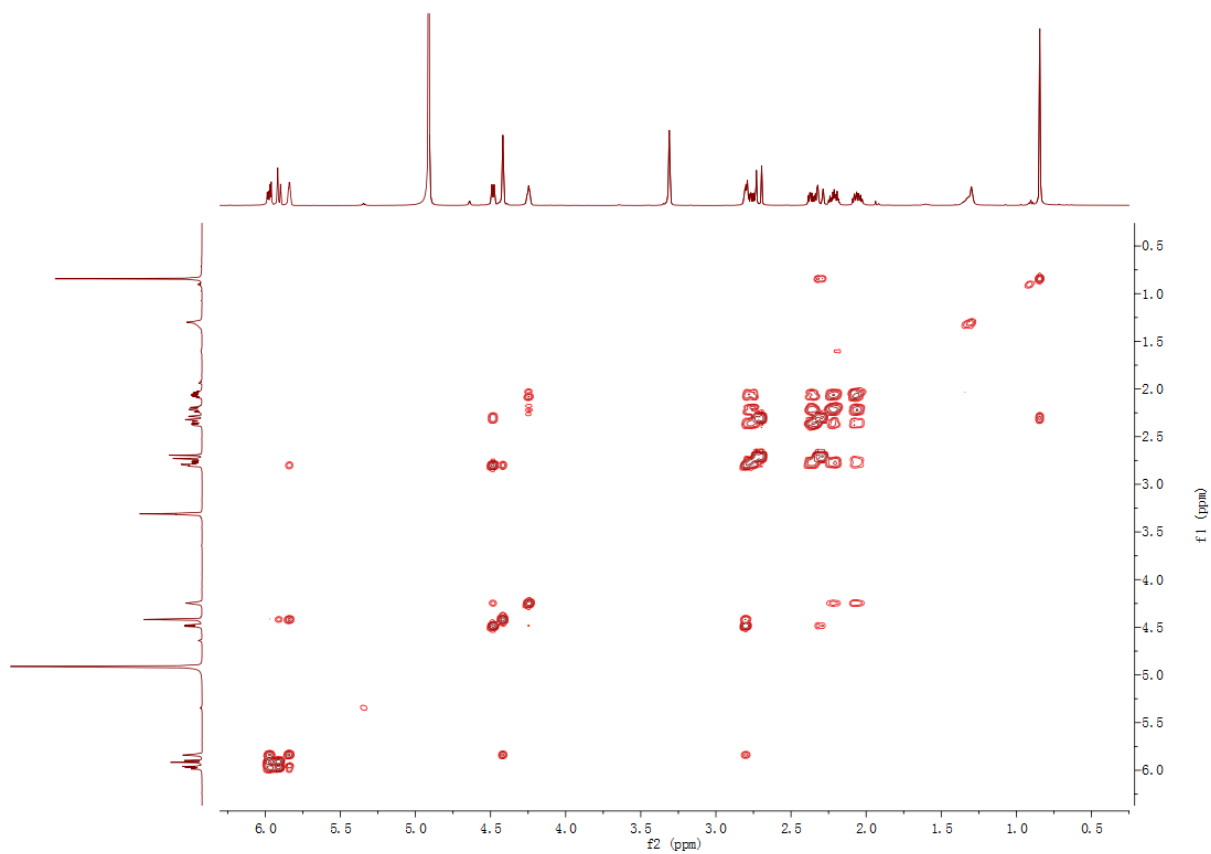

**Figure S23.** The  $^1\text{H}$ - $^1\text{H}$  COSY spectrum of compound **3** in  $\text{CD}_3\text{OD}$

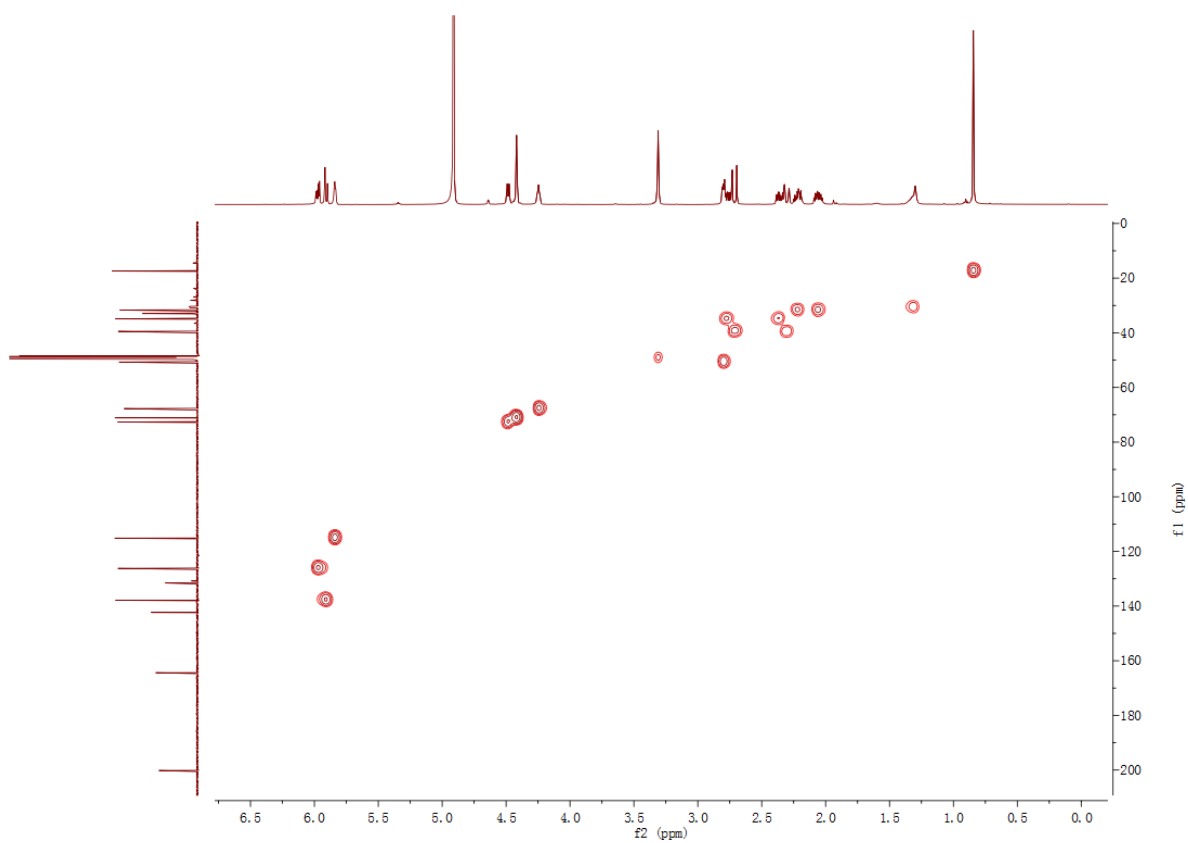

**Figure S24.** The HSQC spectrum of compound **3** in  $\text{CD}_3\text{OD}$

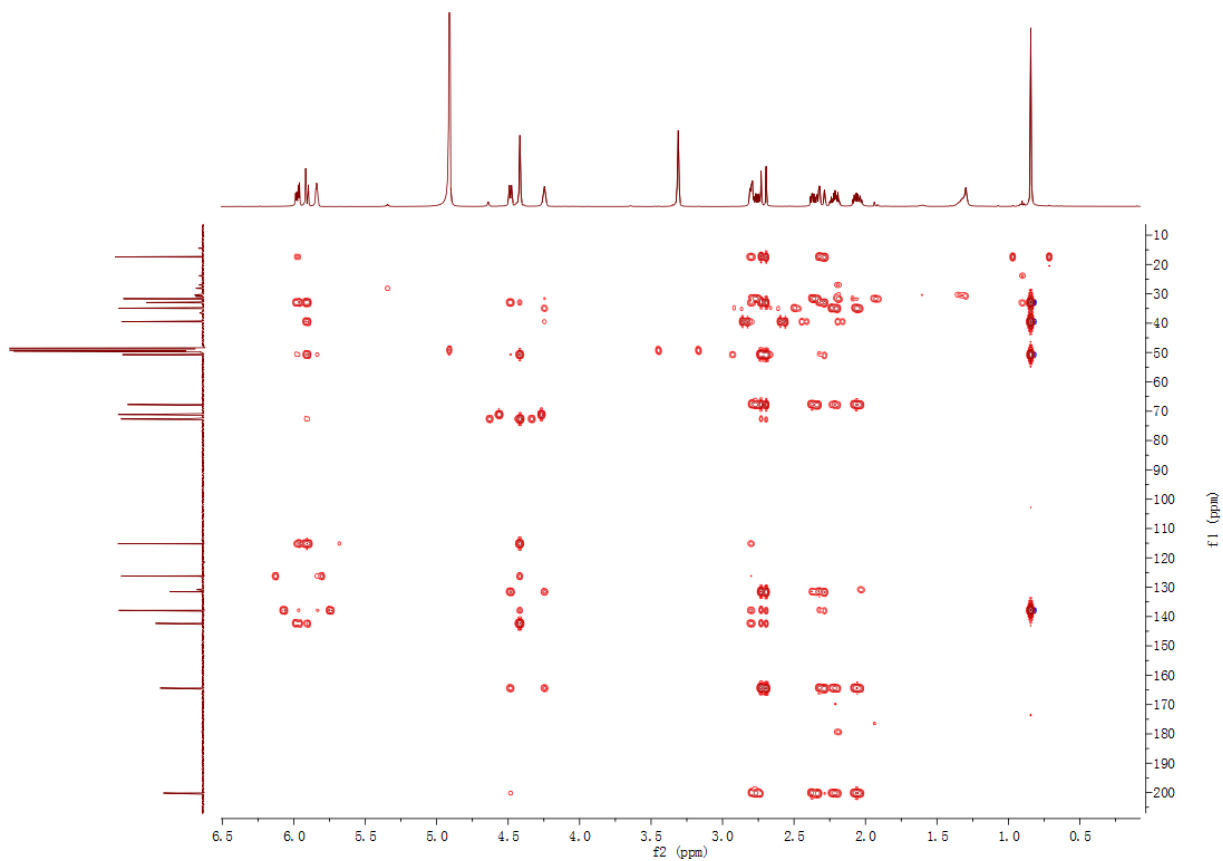

**Figure S25.** The HMBC spectrum of compound **3** in CD<sub>3</sub>OD

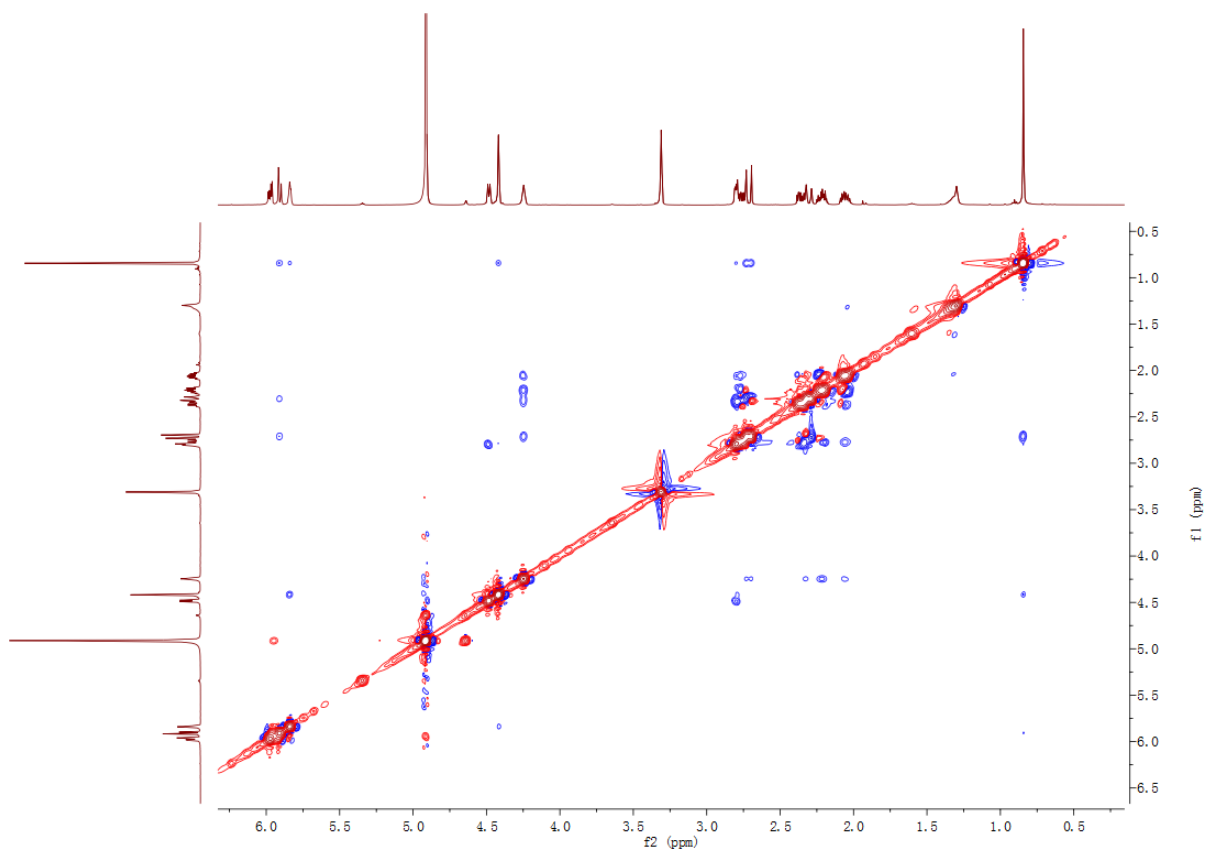

**Figure S26.** The ROESY spectrum of compound **3** in CD<sub>3</sub>OD



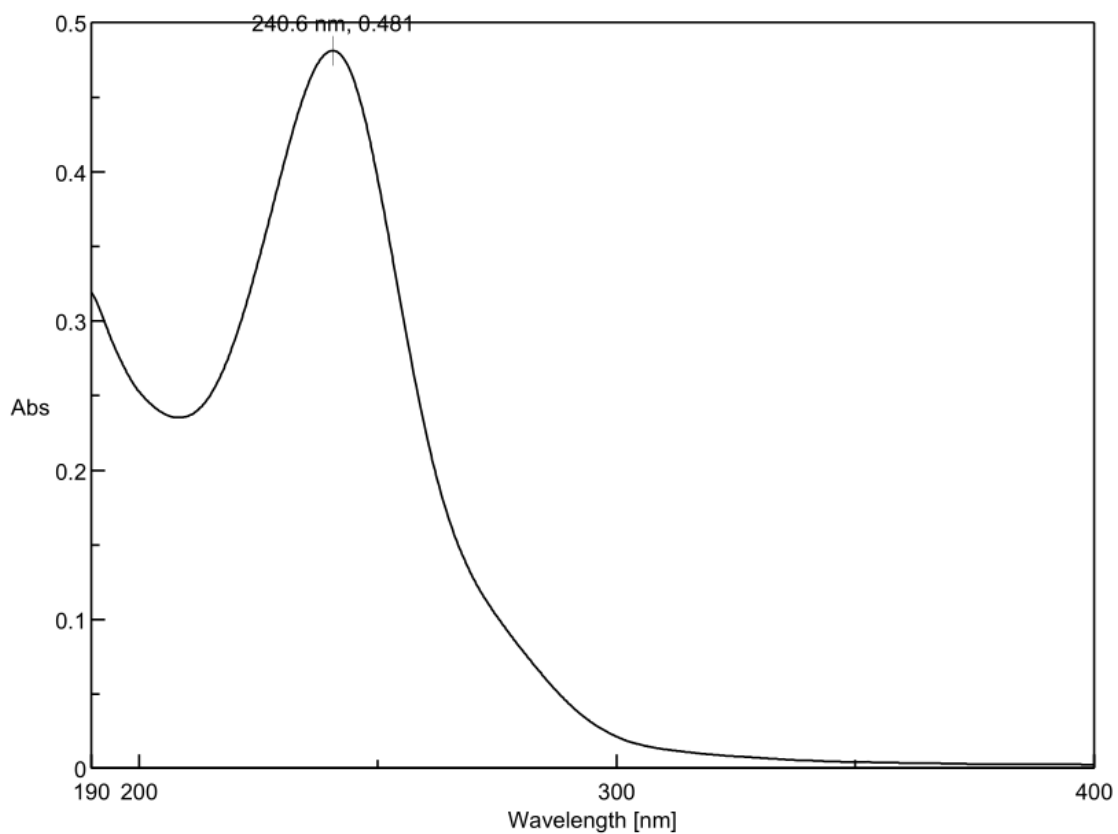

**Figure S27.** The UV spectrum of compound **3** in H<sub>2</sub>O

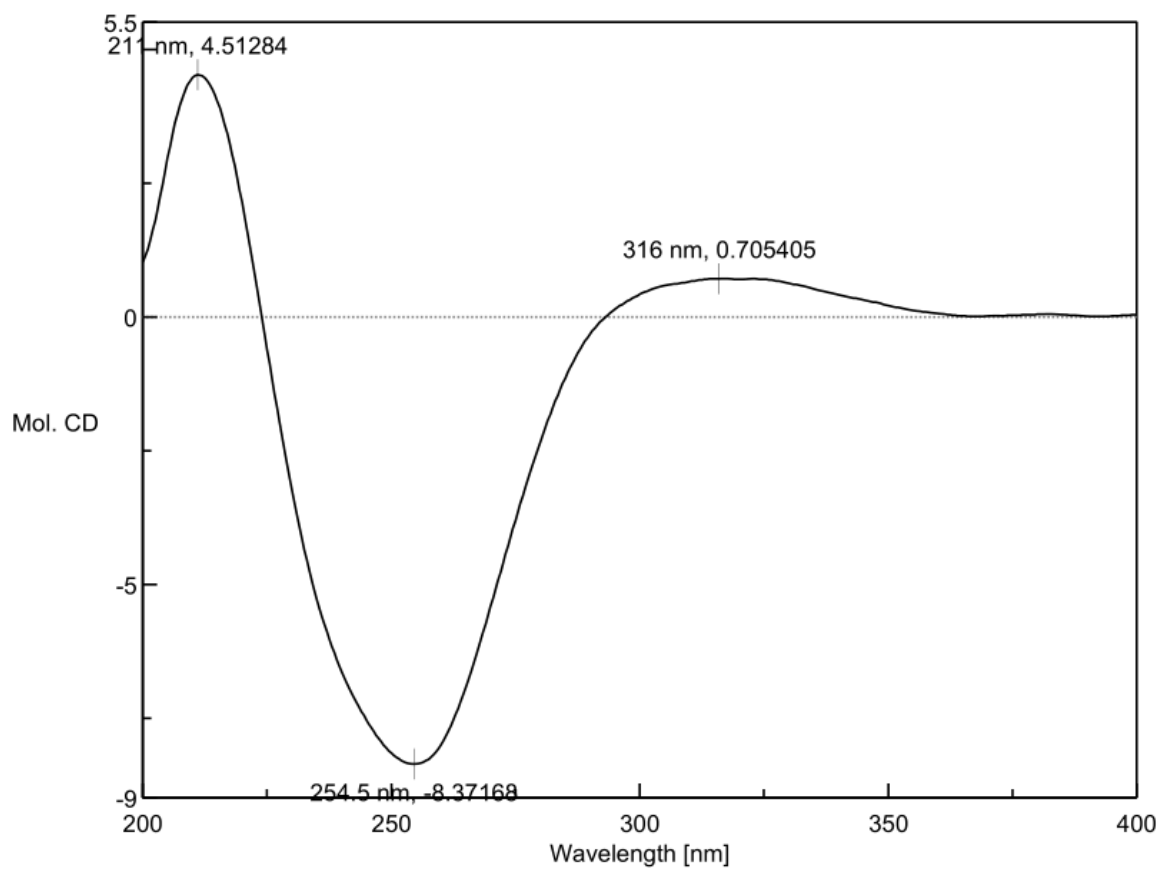

**Figure S28.** The ECD spectrum of compound **3** in MeOH

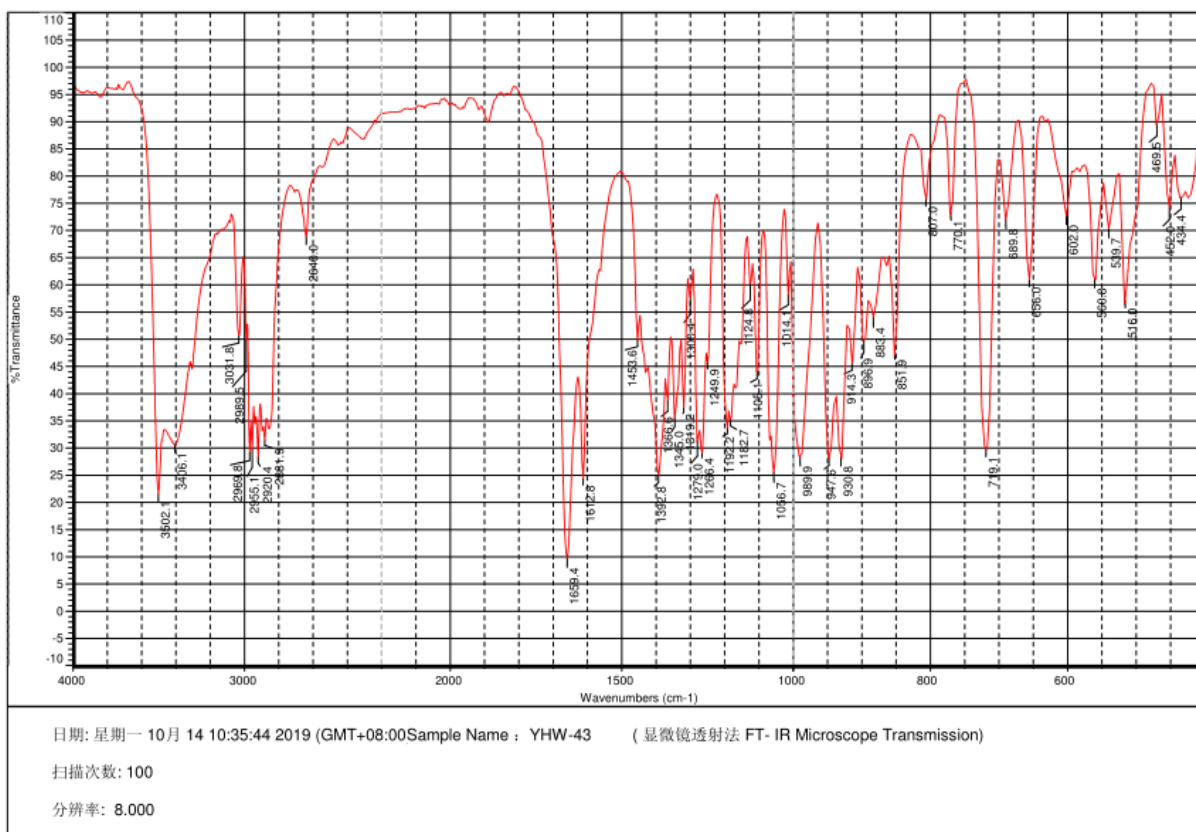

Figure S29. The IR spectrum of compound 3

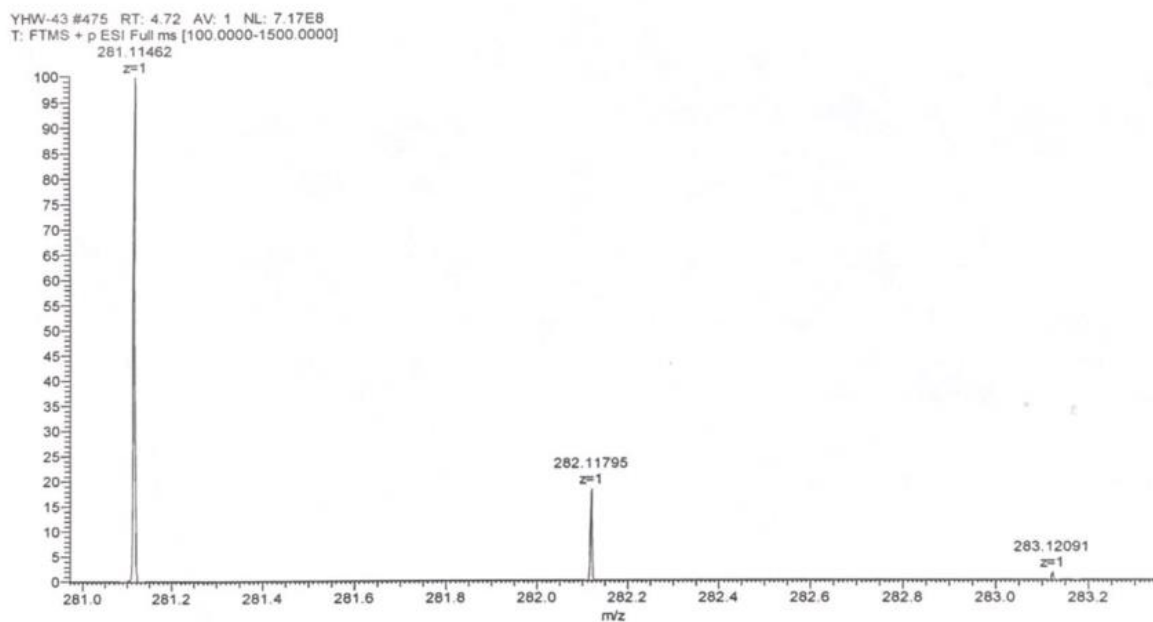

| m/z       | Theo. Mass | Delta (ppm) | RDB equiv. | Composition   |      |
|-----------|------------|-------------|------------|---------------|------|
| 281.11462 | 281.11482  | -0.7        | 7.5        | C16 H18 O3 Na | M+Na |

Figure S30. The HR-ESI-MS data of compound 3

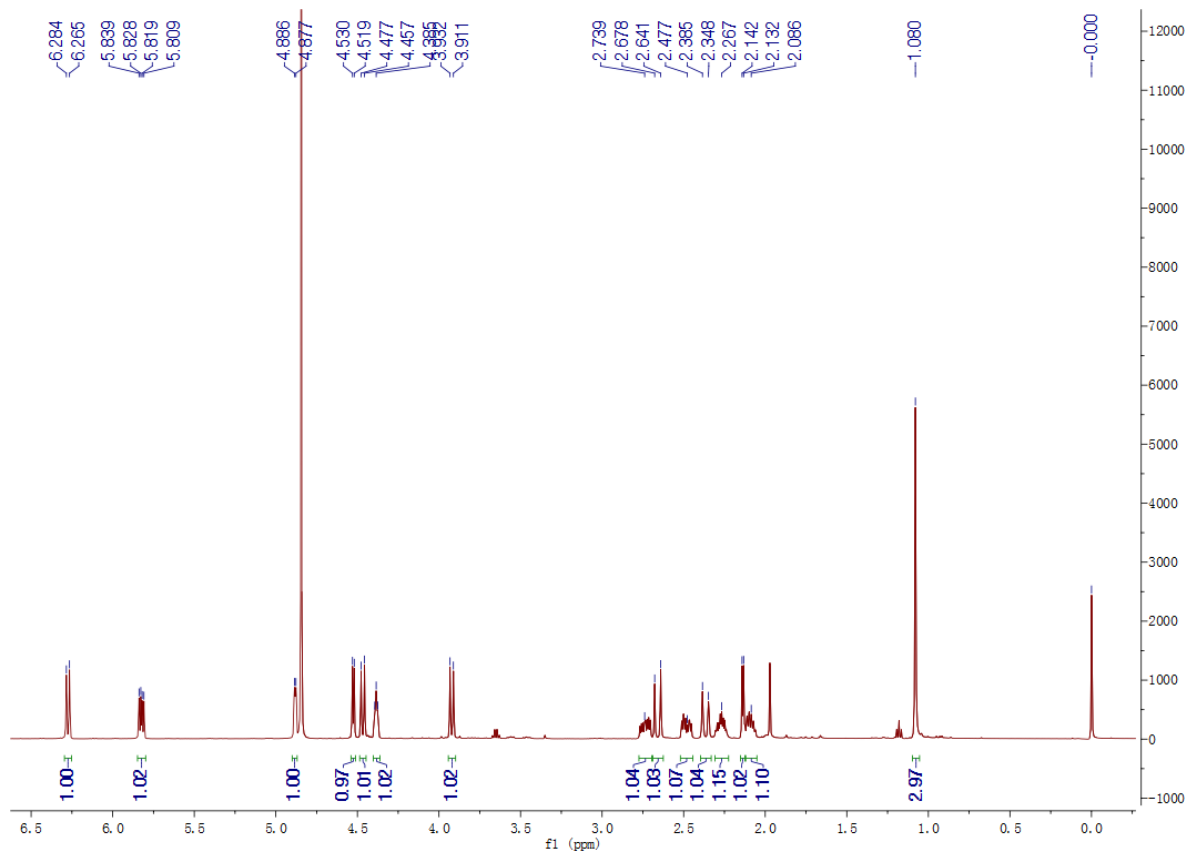

Figure S31. The  $^1\text{H}$  NMR spectrum of compound **4** in  $\text{D}_2\text{O}$

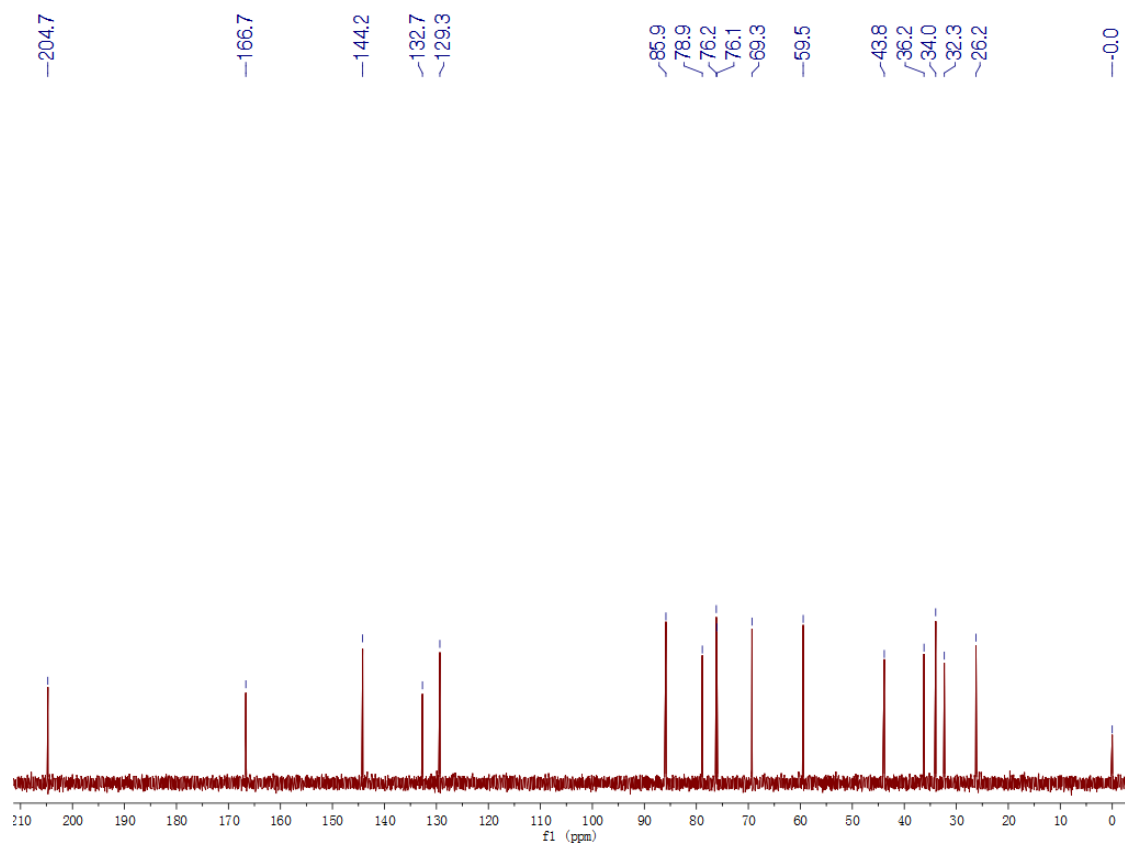

Figure S32. The  $^{13}\text{C}$  NMR spectrum of compound **4** in  $\text{D}_2\text{O}$

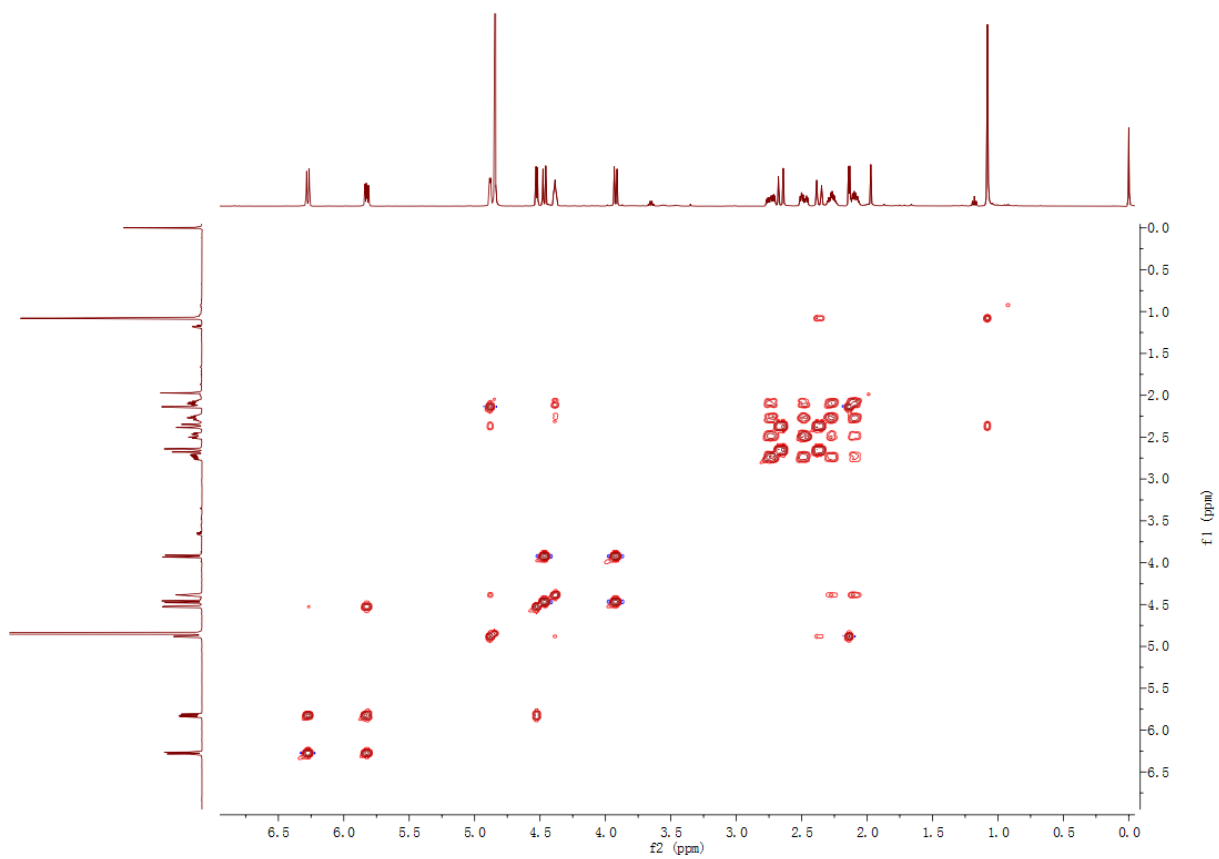

**Figure S33.** The  $^1\text{H}$ - $^1\text{H}$  COSY spectrum of compound **4** in  $\text{D}_2\text{O}$

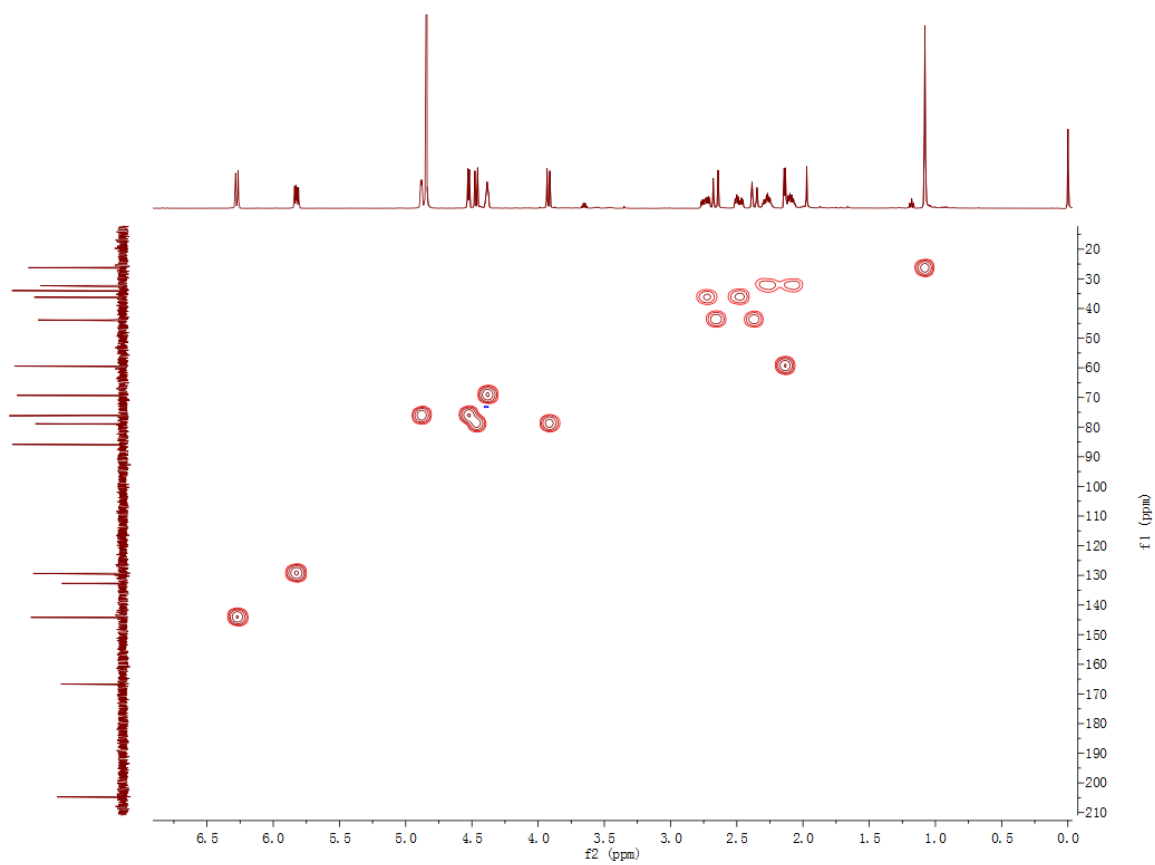

**Figure S34.** The HSQC spectrum of compound **4** in  $\text{D}_2\text{O}$

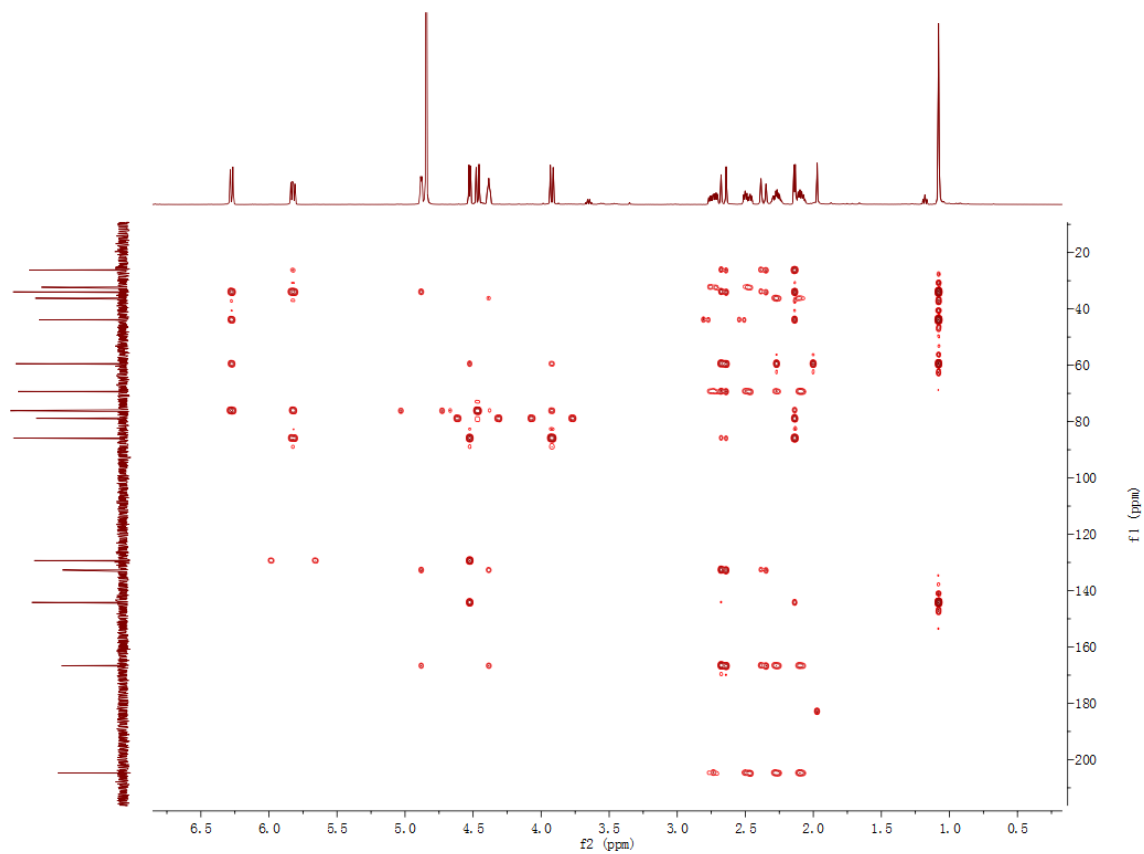

**Figure S35.** The HMBC spectrum of compound **4** in D<sub>2</sub>O

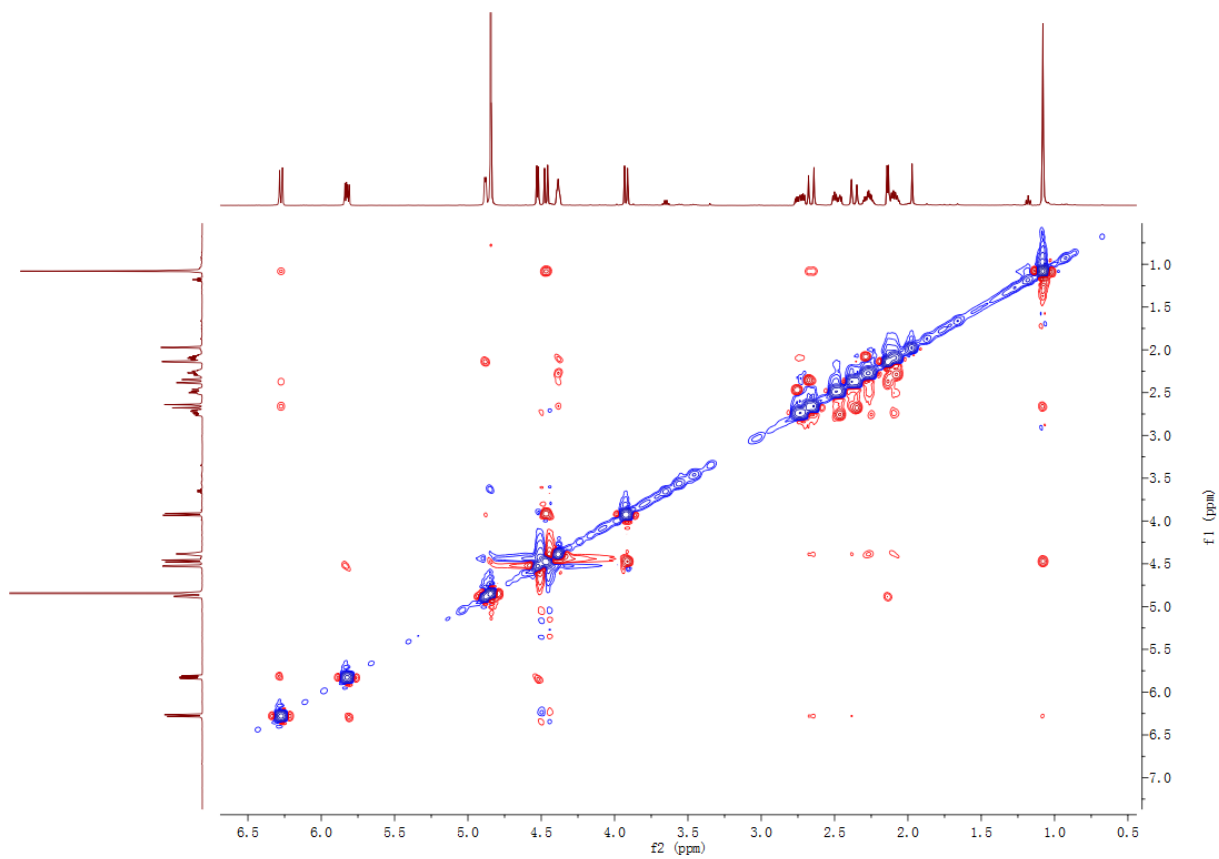

**Figure S36.** The ROESY spectrum of compound **4** in D<sub>2</sub>O

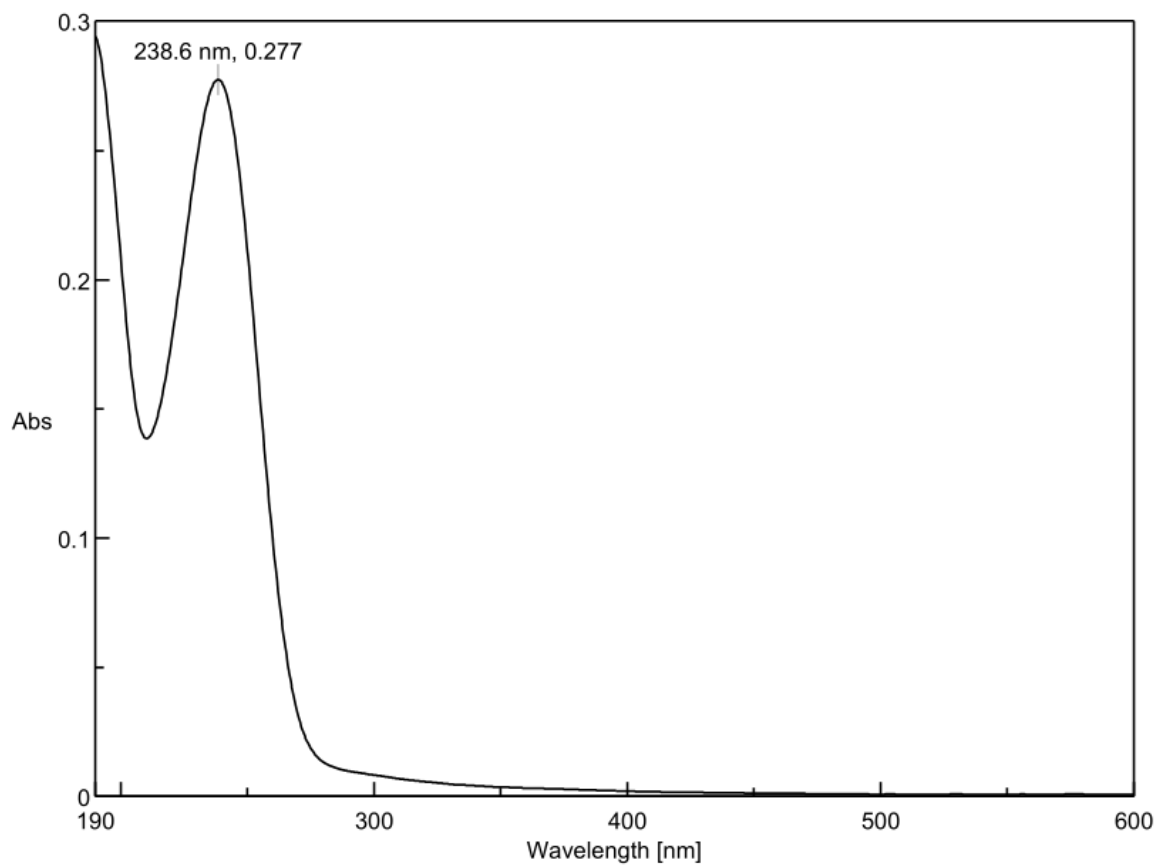

**Figure S37.** The UV spectrum of compound **4** in H<sub>2</sub>O

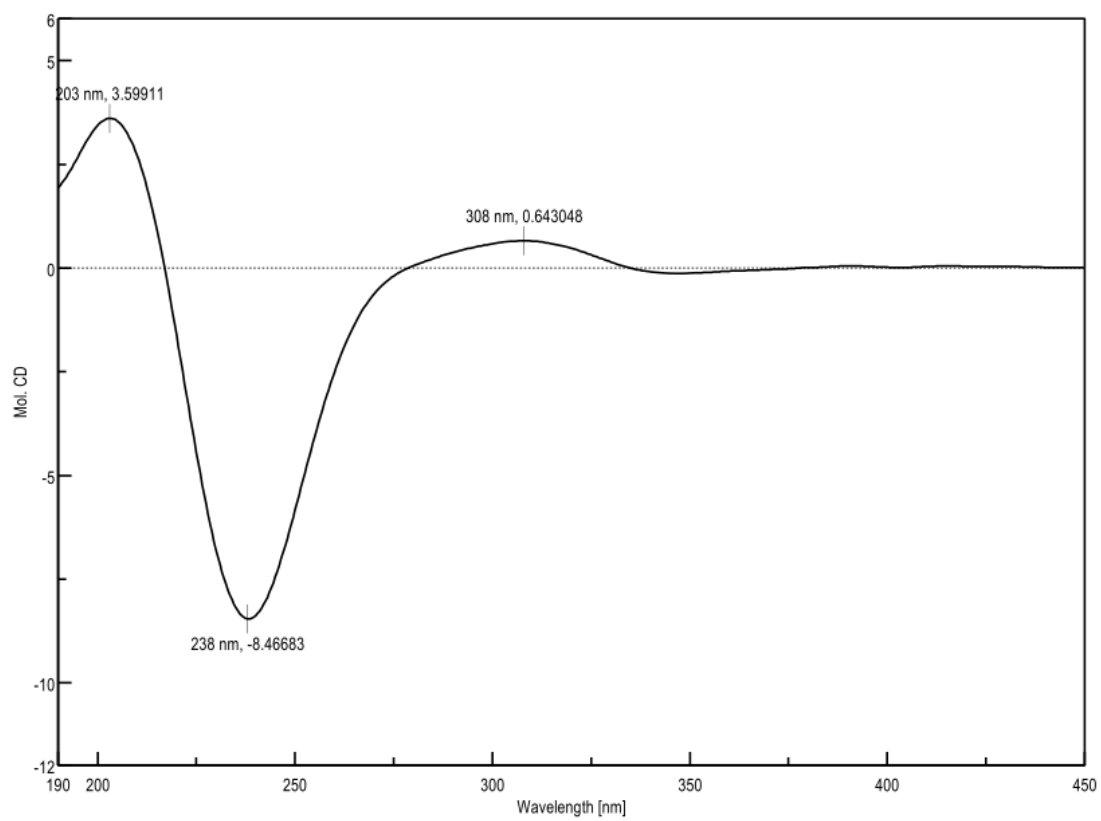

**Figure S38.** The ECD spectrum of compound **4** in H<sub>2</sub>O

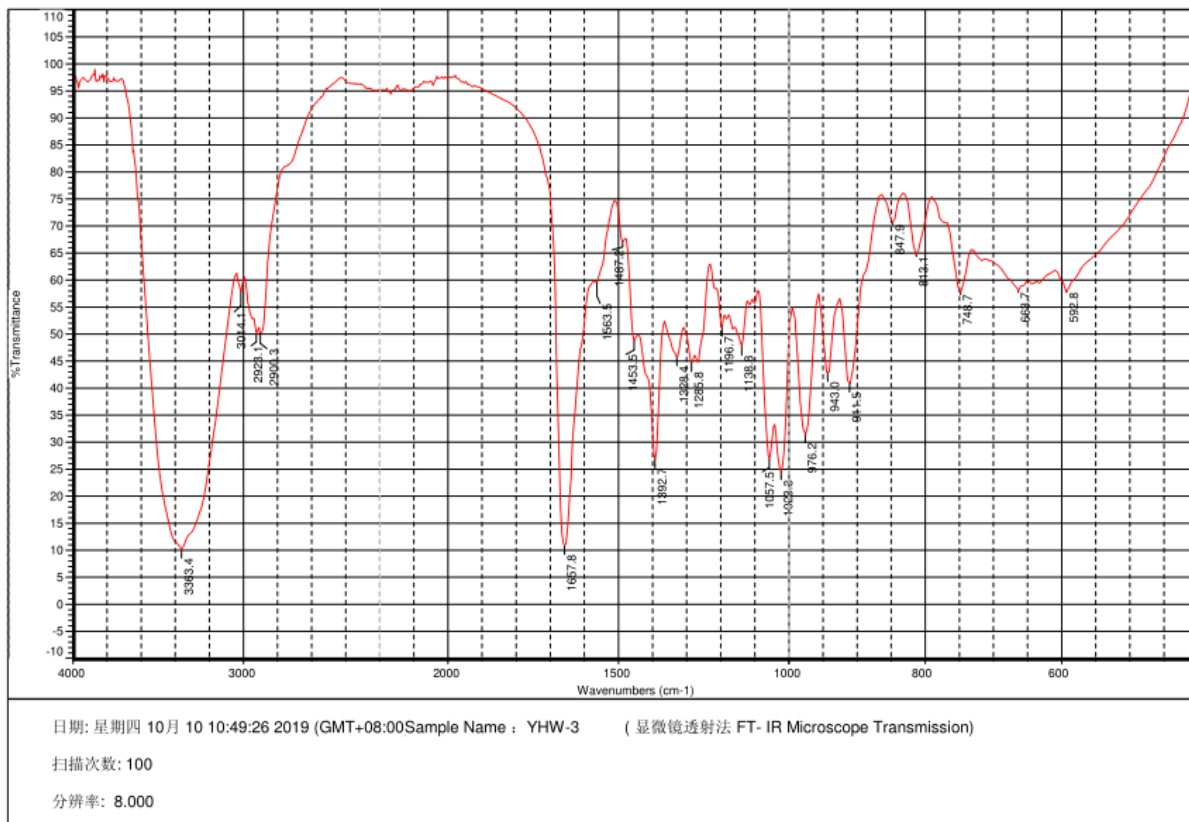

Figure S39. The IR spectrum of compound 4

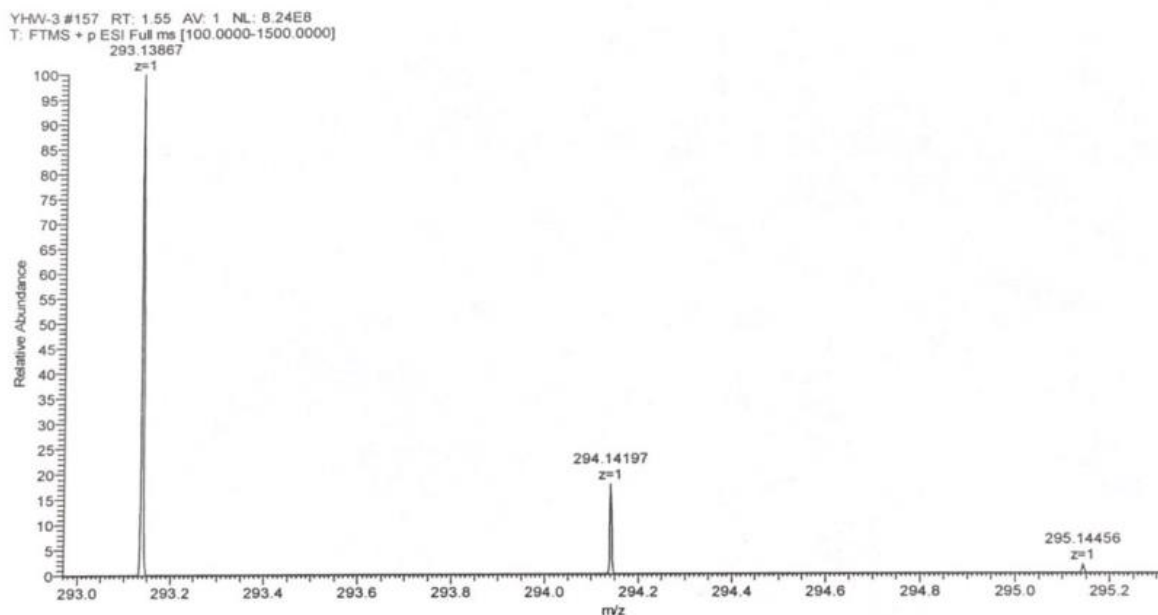

| m/z       | Theo. Mass | Delta (ppm) | RDB equiv. | Composition |     |
|-----------|------------|-------------|------------|-------------|-----|
| 293.13867 | 293.13835  | 1.09        | 6.5        | C16 H21 O5  | M+H |

Figure S40. The HR-ESI-MS data of compound 4

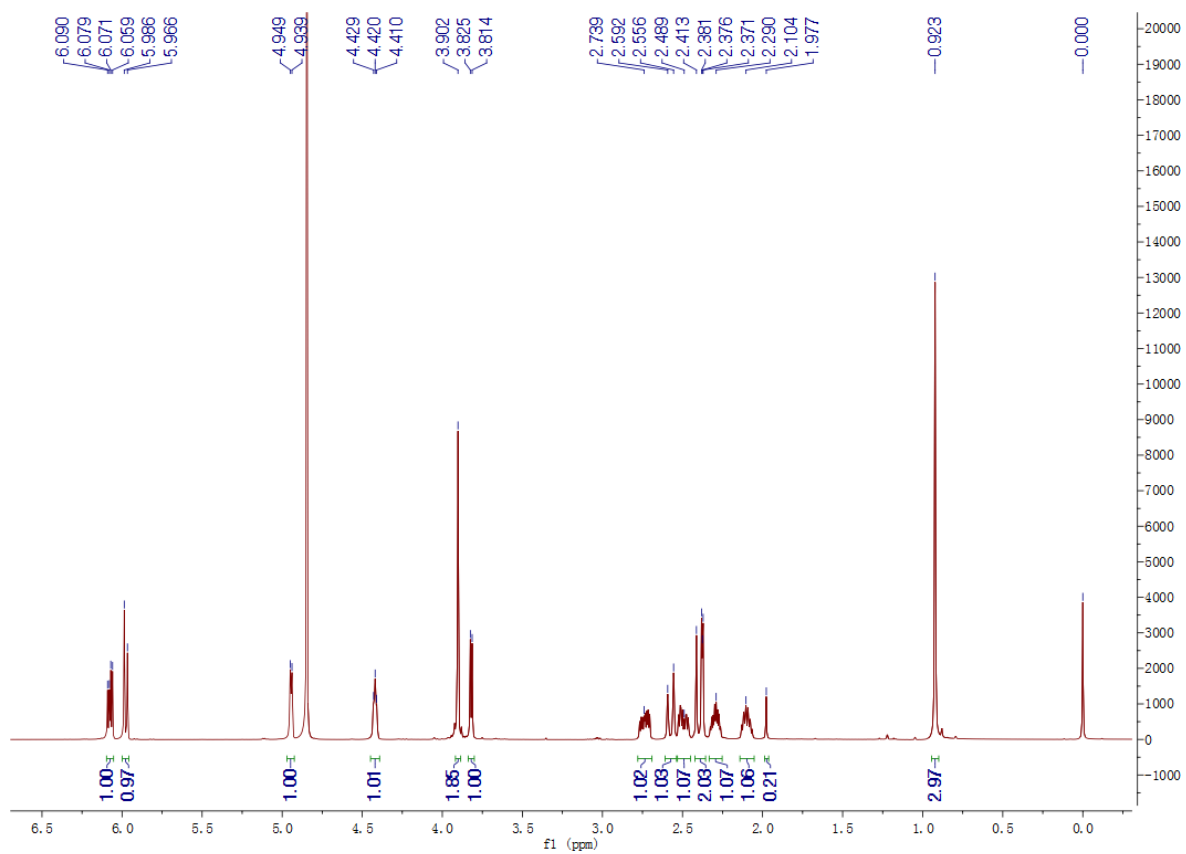

Figure S41. The  $^1\text{H}$  NMR spectrum of compound **5** in  $\text{D}_2\text{O}$

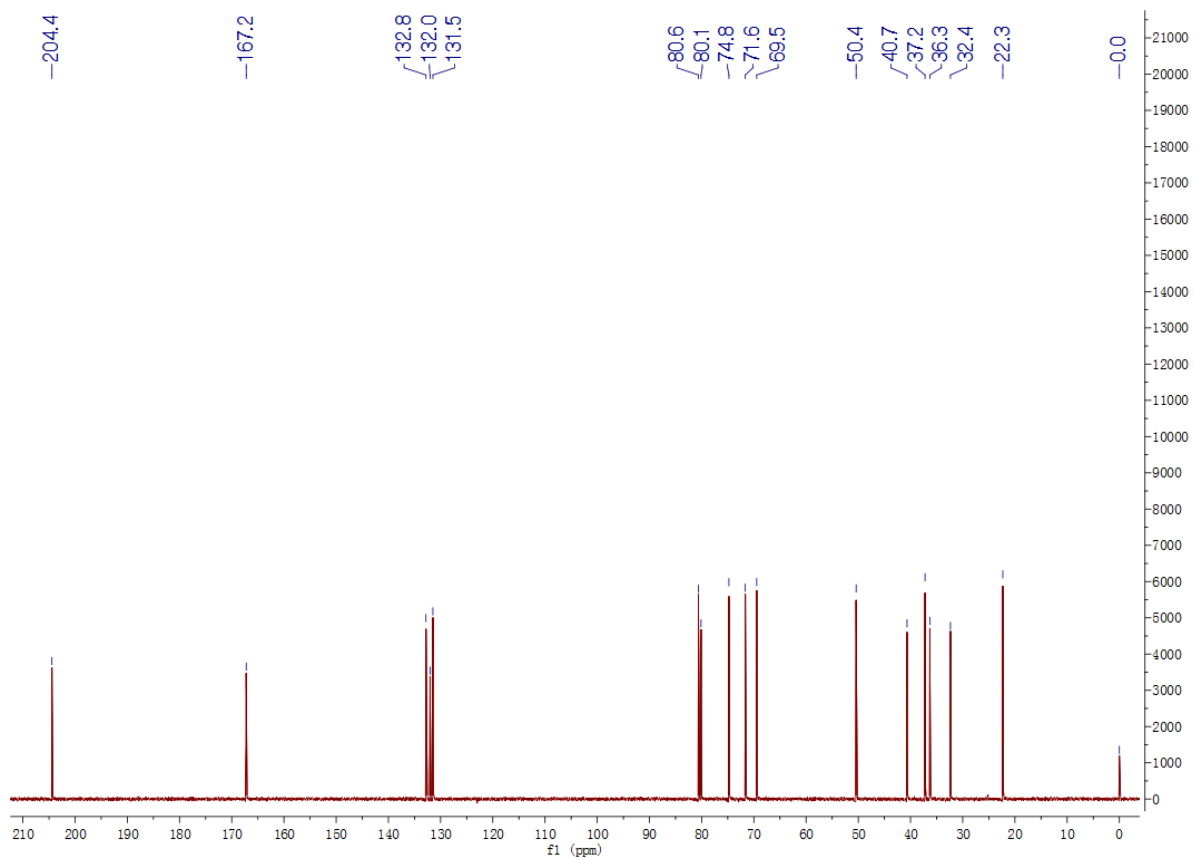

Figure S42. The  $^{13}\text{C}$  NMR spectrum of compound **5** in  $\text{D}_2\text{O}$



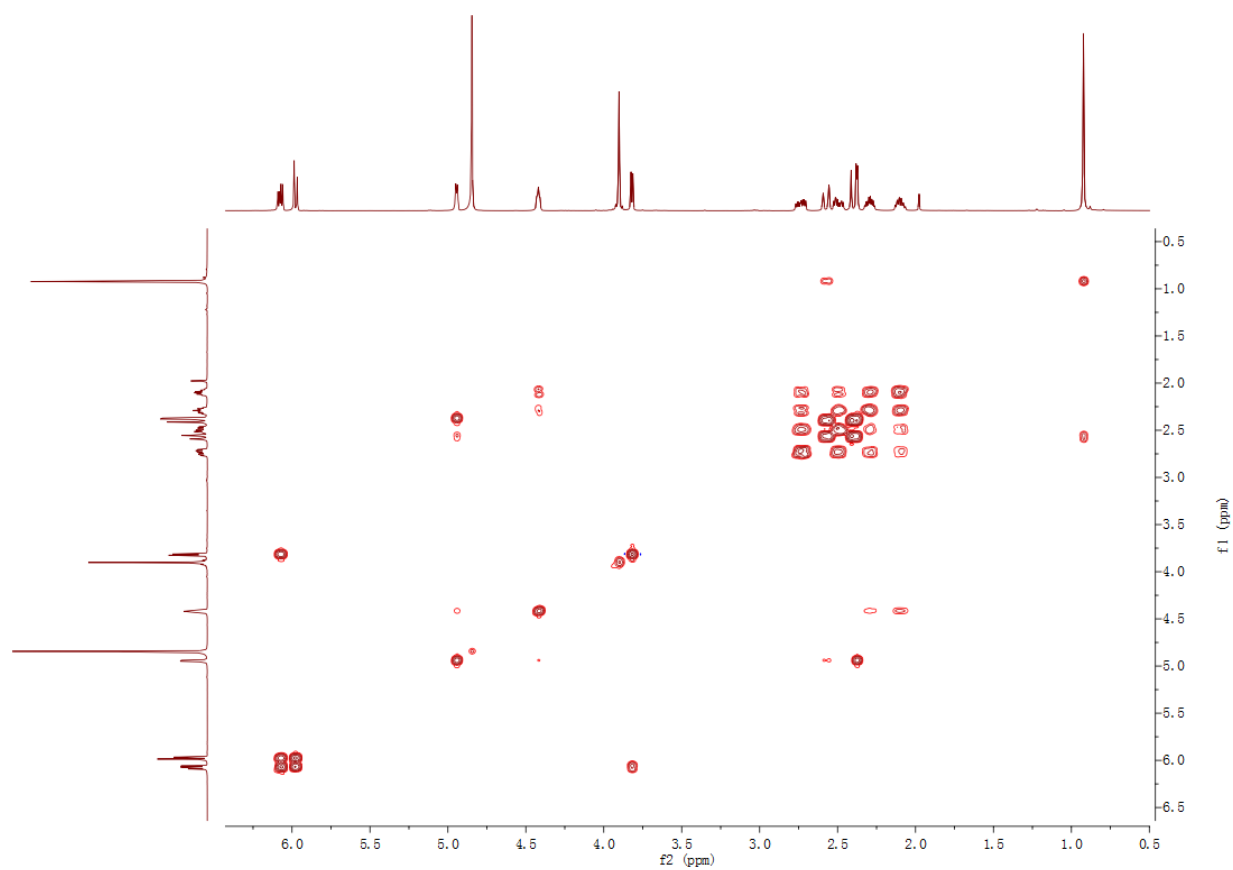

**Figure S43.** The  $^1\text{H}$ - $^1\text{H}$  COSY spectrum of compound **5** in  $\text{D}_2\text{O}$

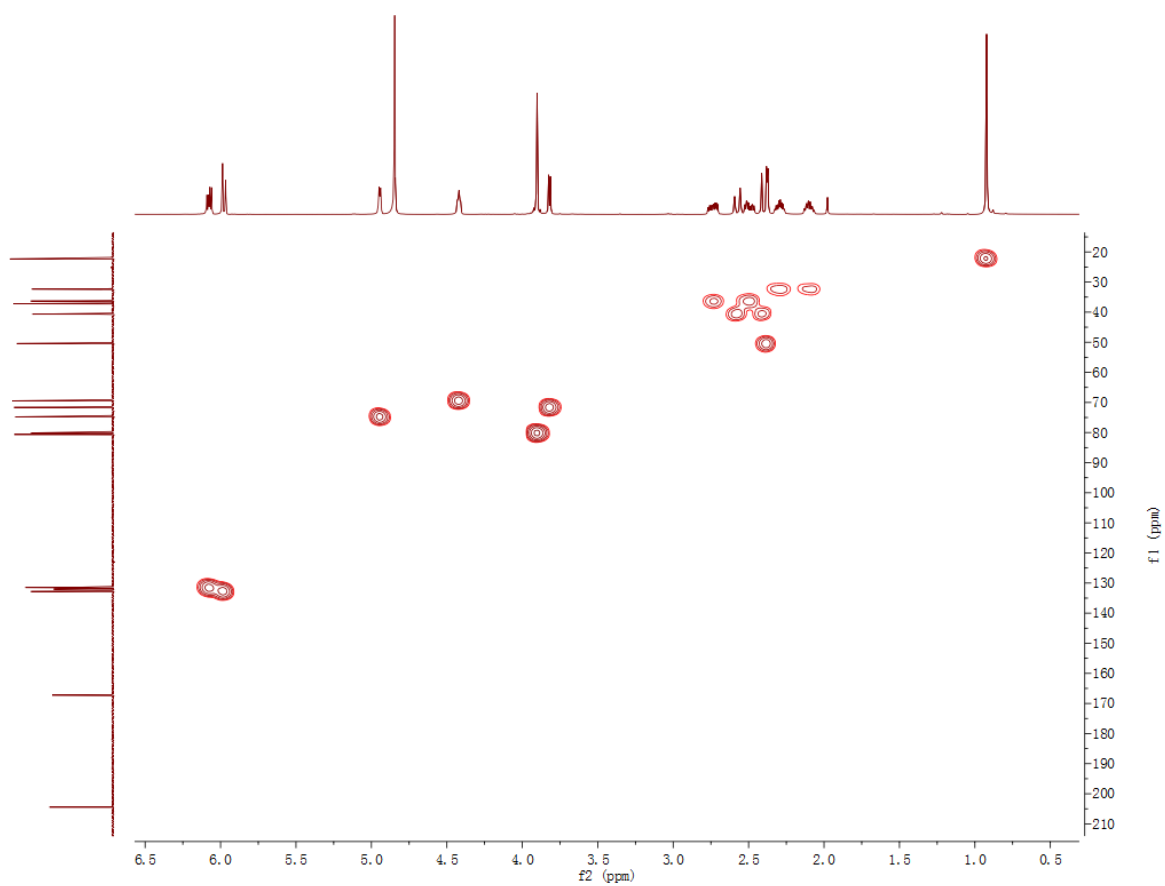

**Figure S44.** The HSQC spectrum of compound **5** in  $\text{D}_2\text{O}$

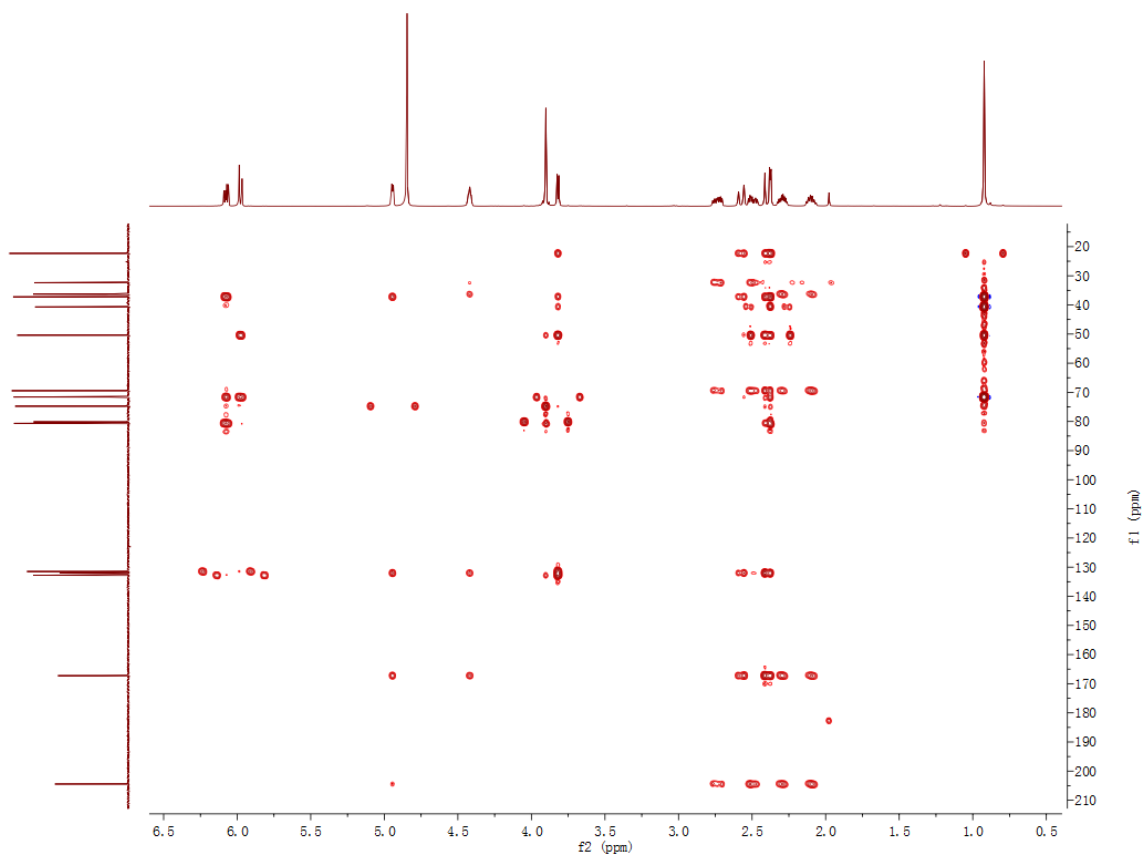

**Figure S45.** The HMBC spectrum of compound **5** in D<sub>2</sub>O

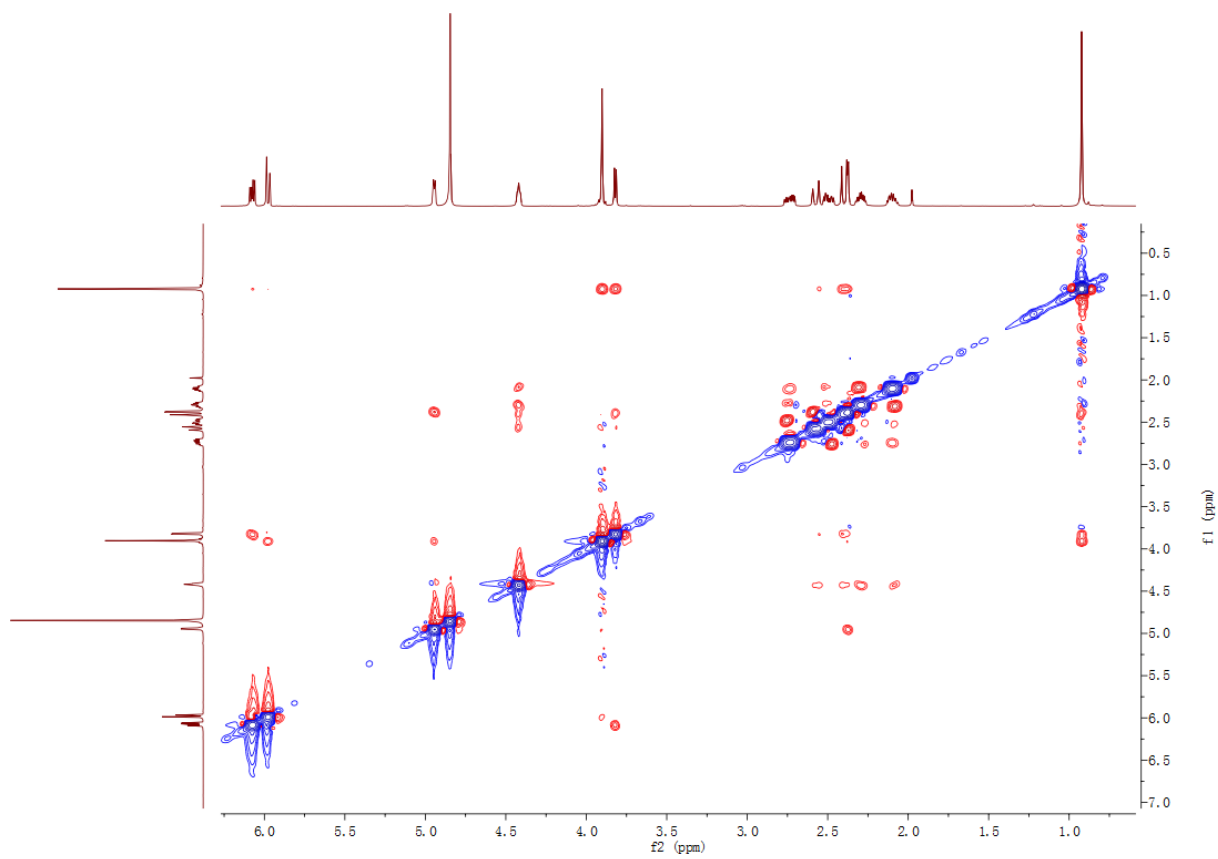

**Figure S46.** The ROESY spectrum of compound **5** in D<sub>2</sub>O

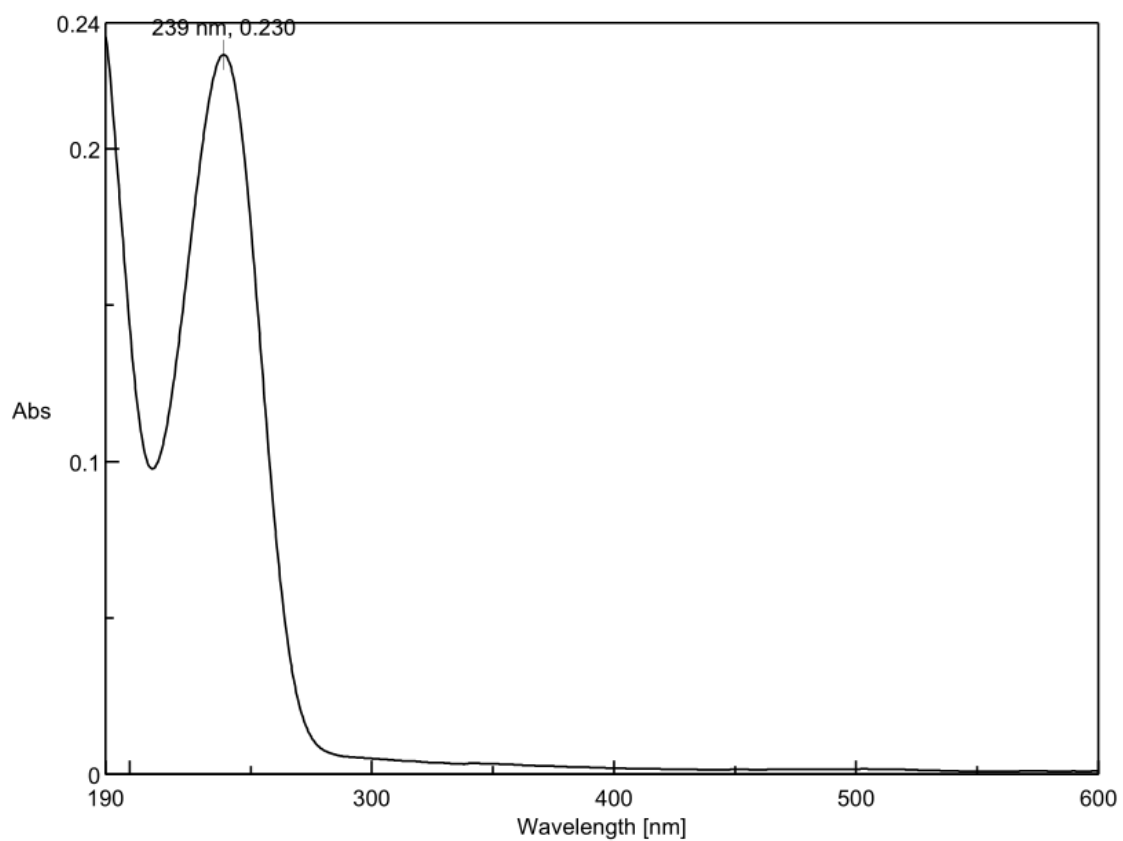

**Figure S47.** The UV spectrum of compound **5** in H<sub>2</sub>O

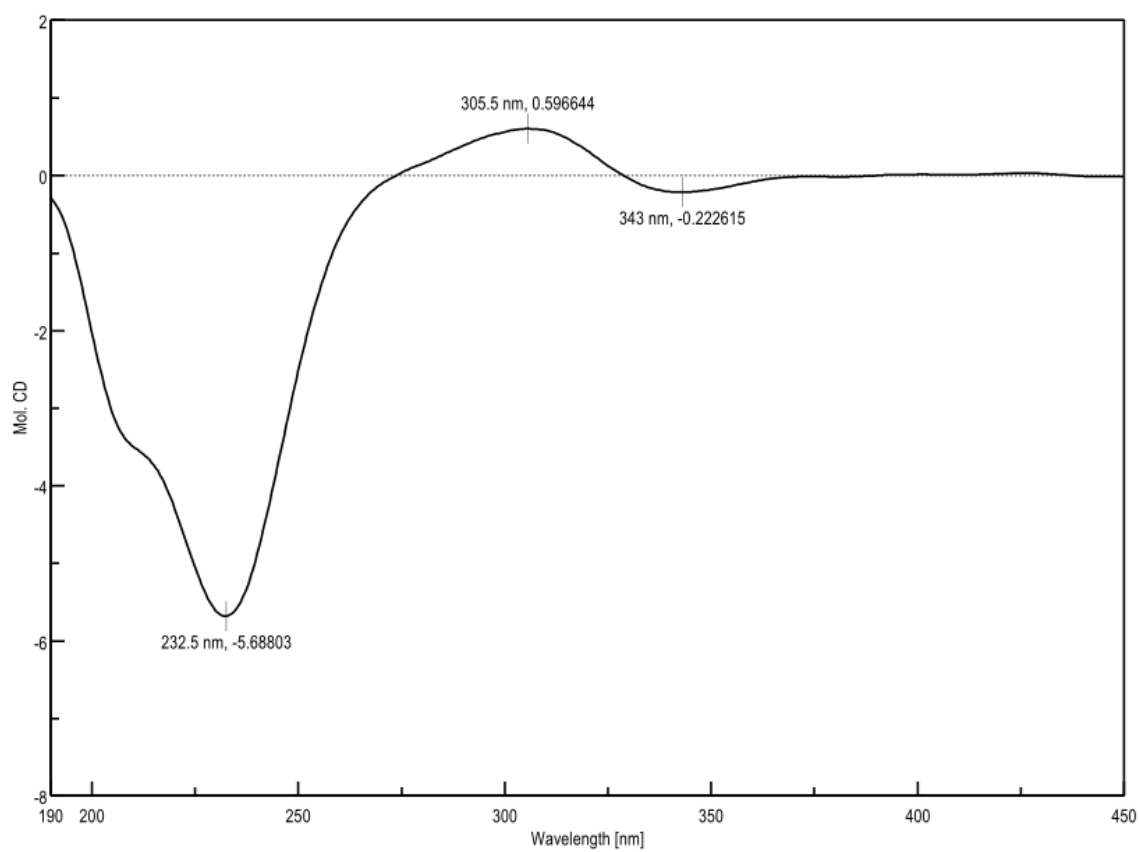

**Figure S48.** The ECD spectrum of compound **5** in H<sub>2</sub>O

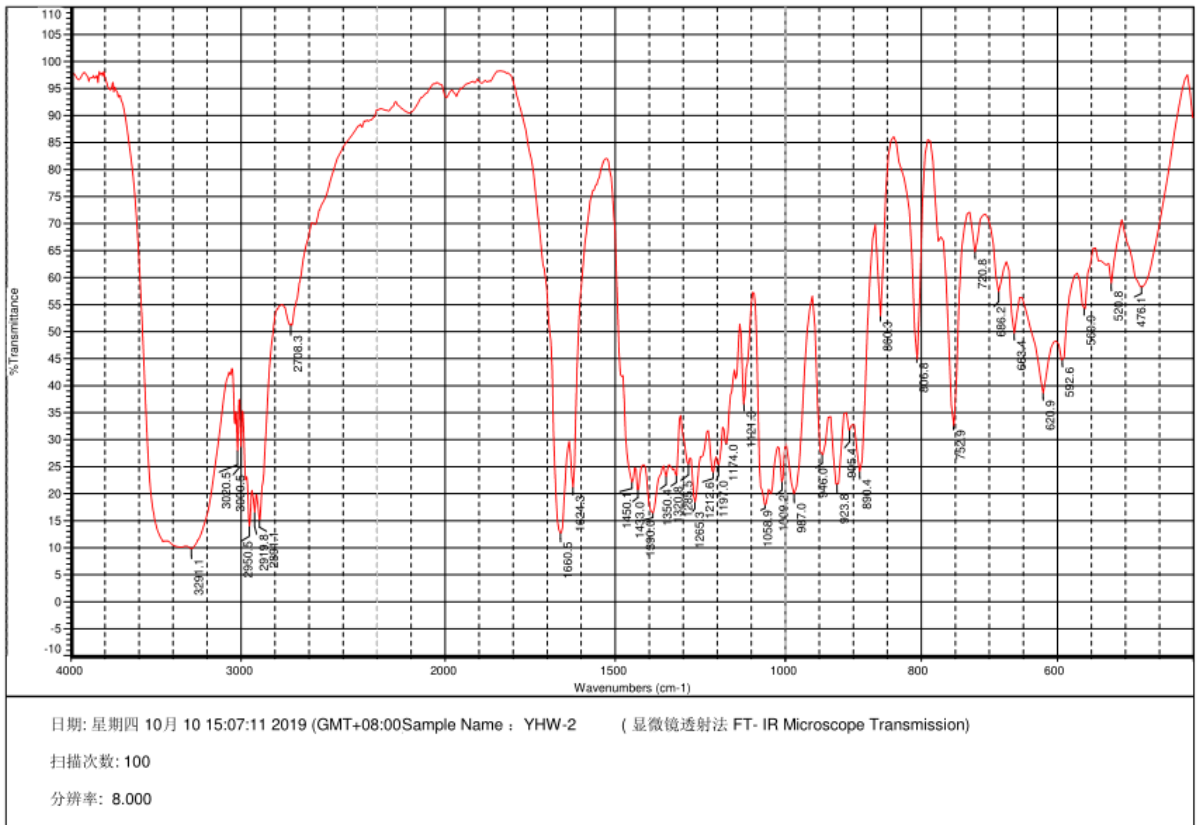

Figure S49. The IR spectrum of compound 5

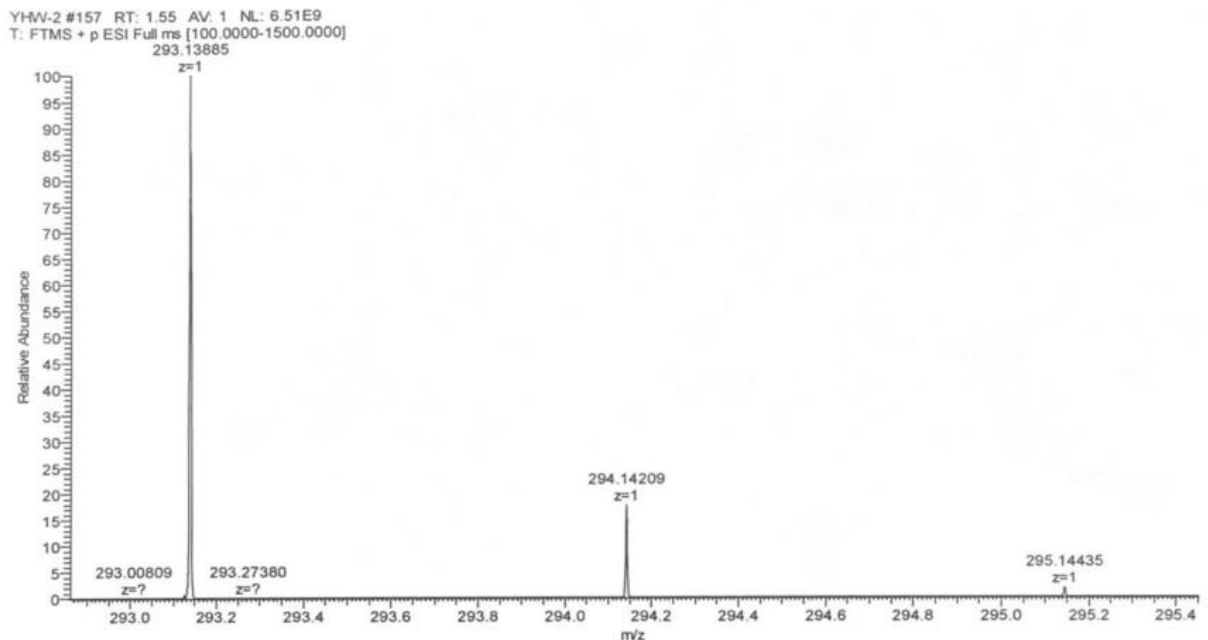

| m/z       | Theo. Mass | Delta (ppm) | RDB equiv. | Composition |     |
|-----------|------------|-------------|------------|-------------|-----|
| 293.13885 | 293.13835  | 1.7         | 6.5        | C16 H21 O5  | M+H |

Figure S50. The HR-ESI-MS data of compound 5

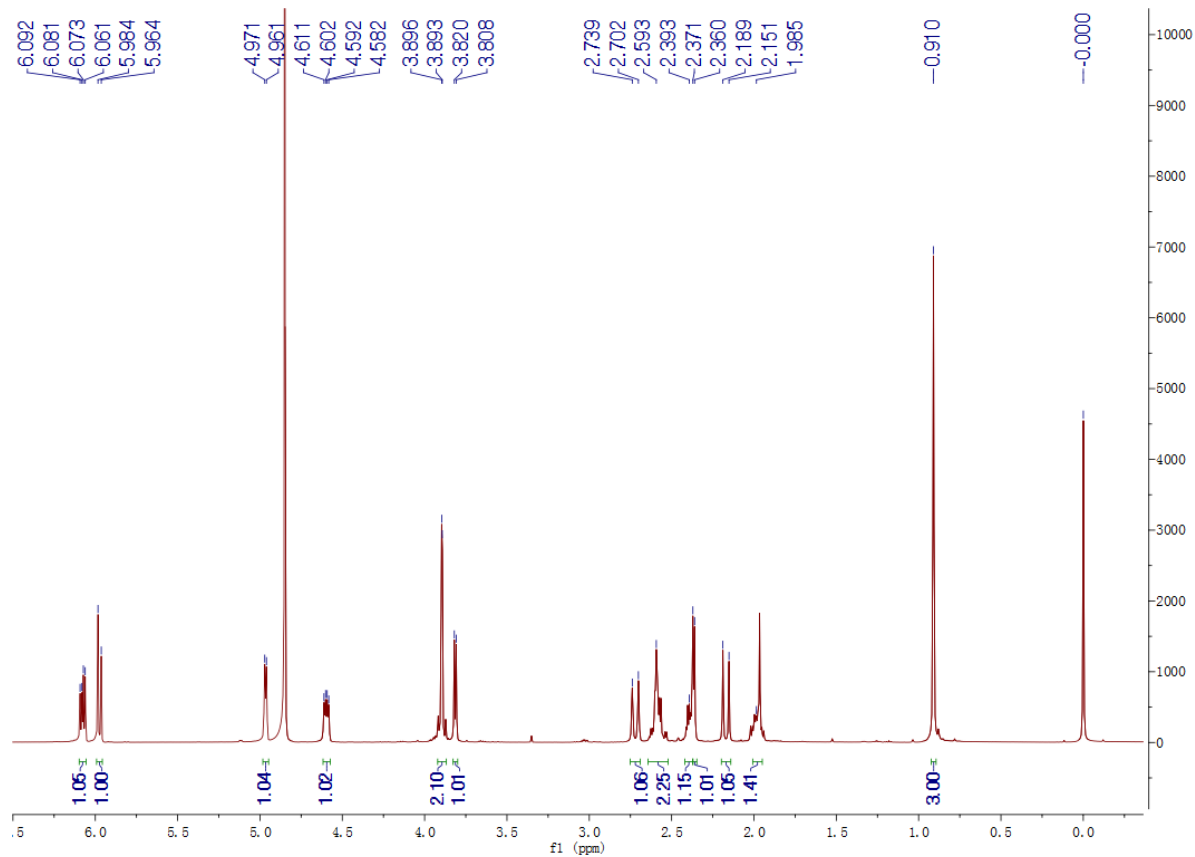

Figure S51. The  $^1\text{H}$  NMR spectrum of compound **6** in  $\text{D}_2\text{O}$

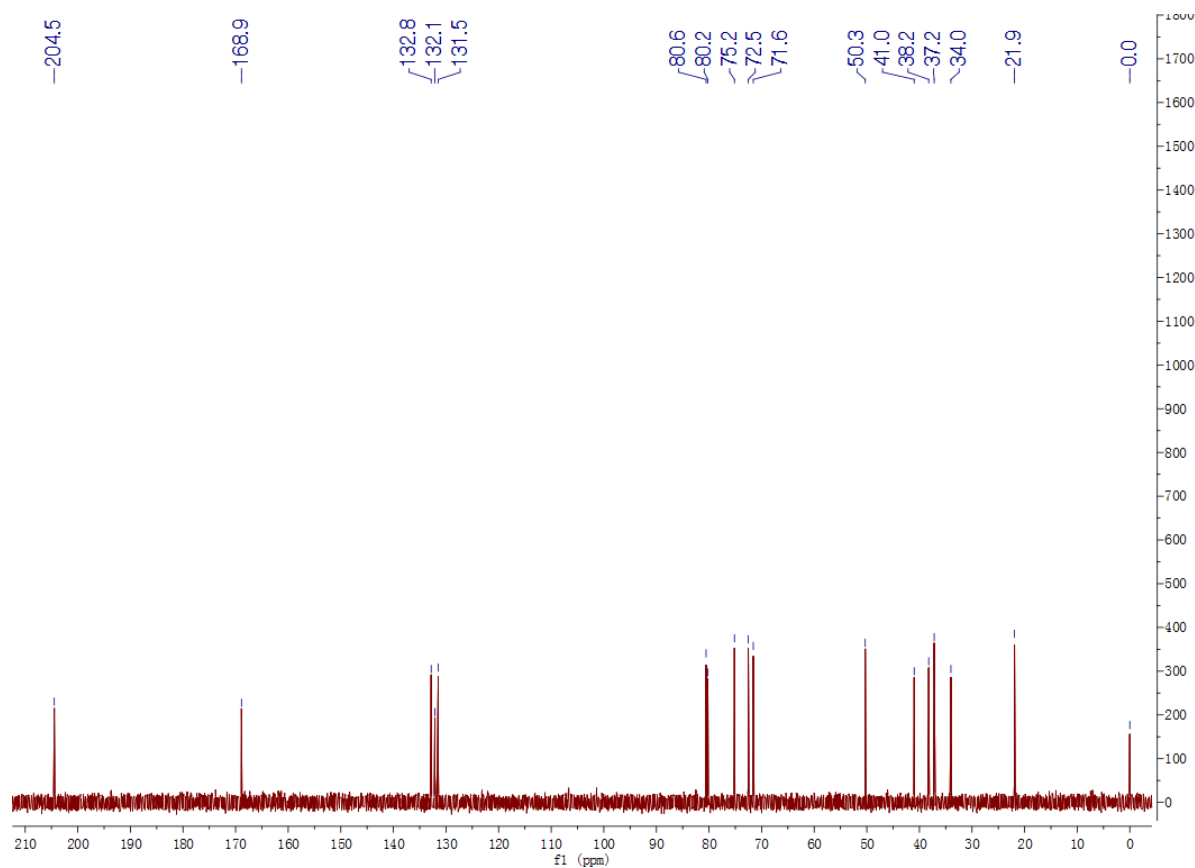

Figure S52. The  $^{13}\text{C}$  NMR spectrum of compound **6** in  $\text{D}_2\text{O}$

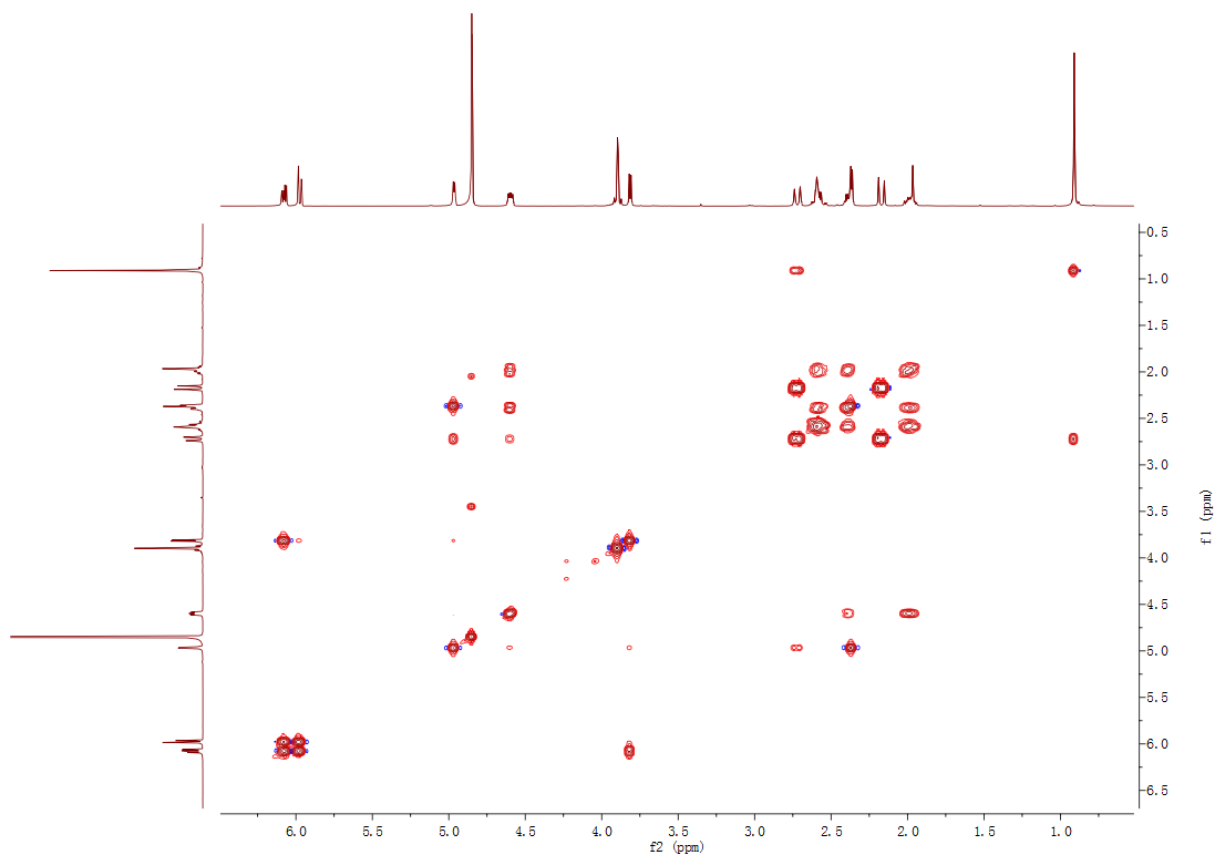

**Figure S53.** The  $^1\text{H}$ - $^1\text{H}$  COSY spectrum of compound **6** in  $\text{D}_2\text{O}$

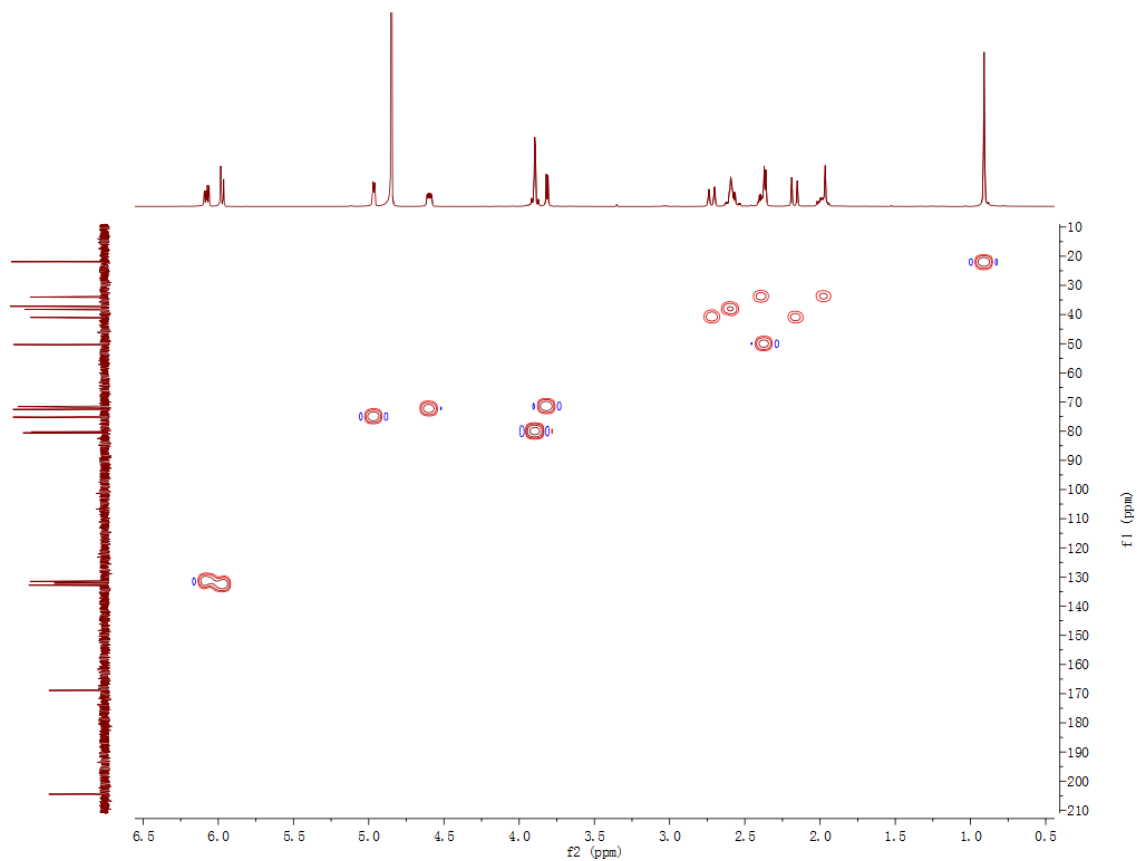

**Figure S54.** The HSQC spectrum of compound **6** in  $\text{D}_2\text{O}$

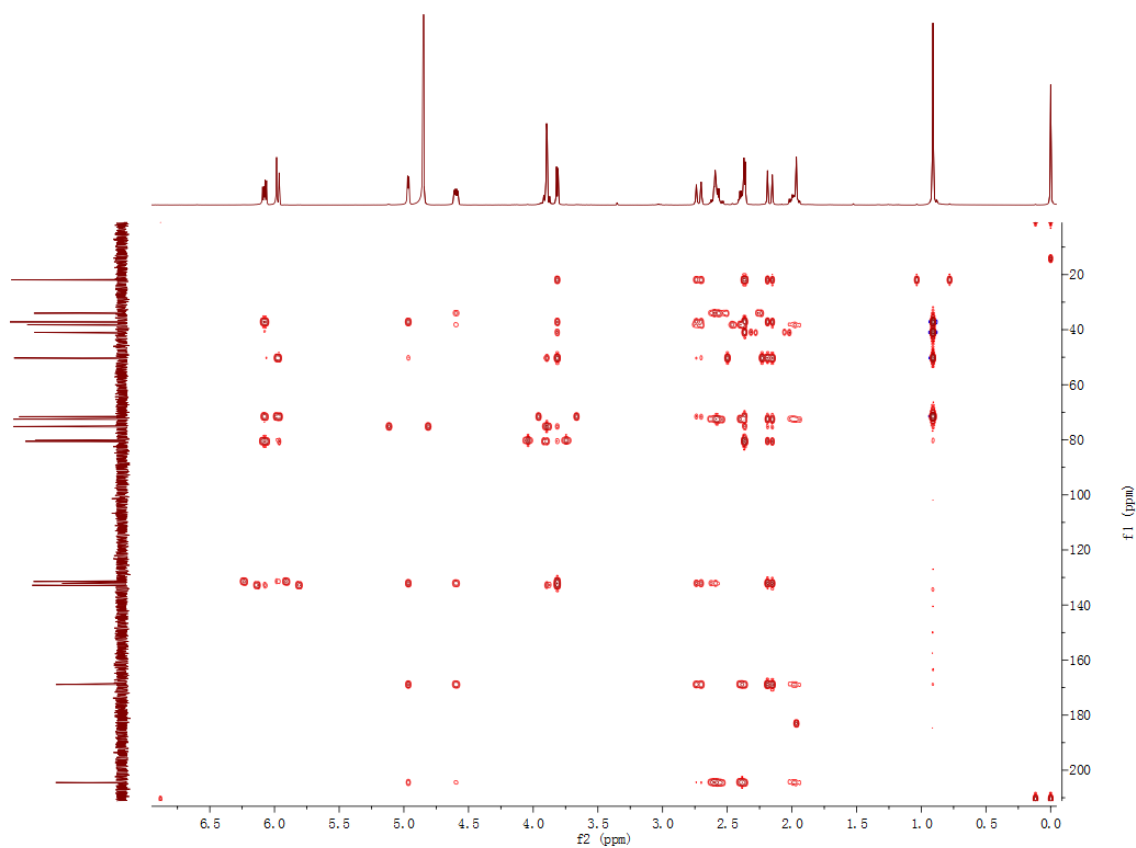

**Figure S55.** The HMBC spectrum of compound **6** in D<sub>2</sub>O

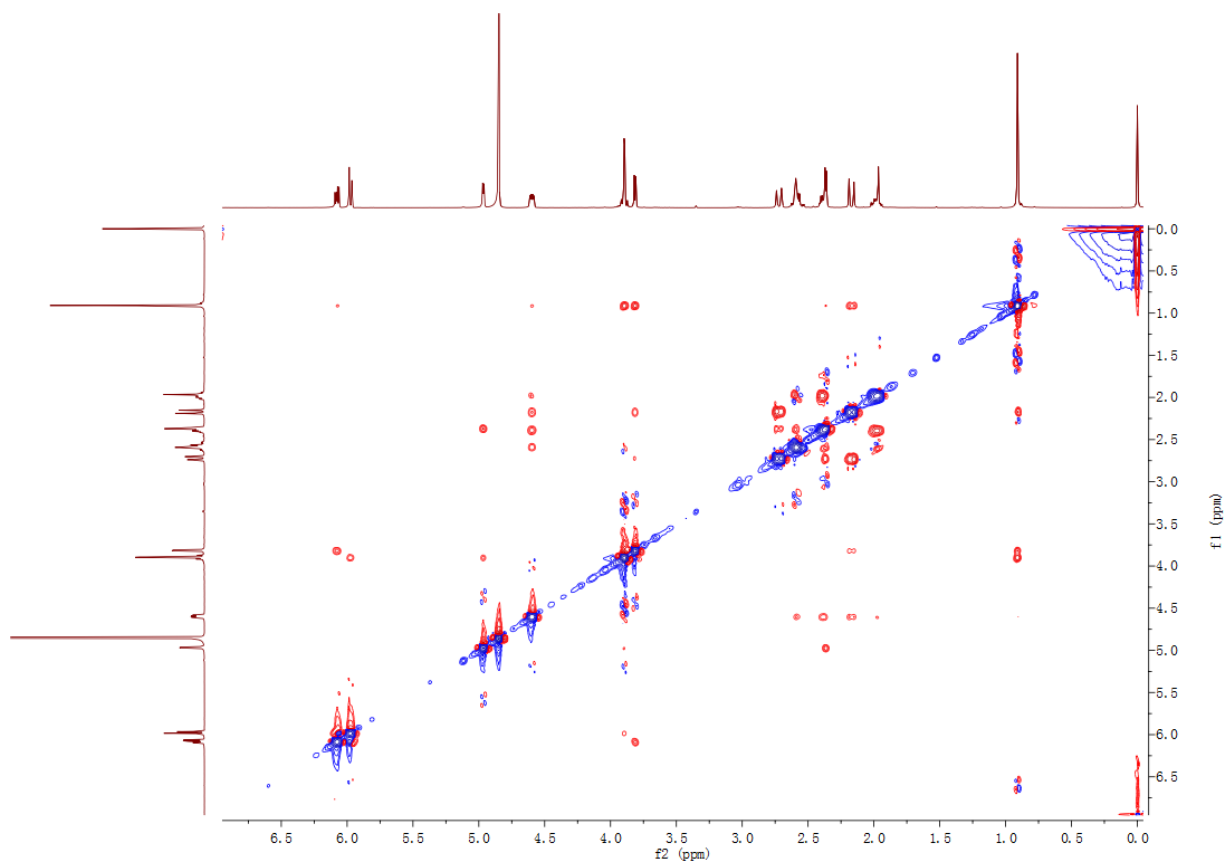

**Figure S56.** The ROESY spectrum of compound **6** in D<sub>2</sub>O

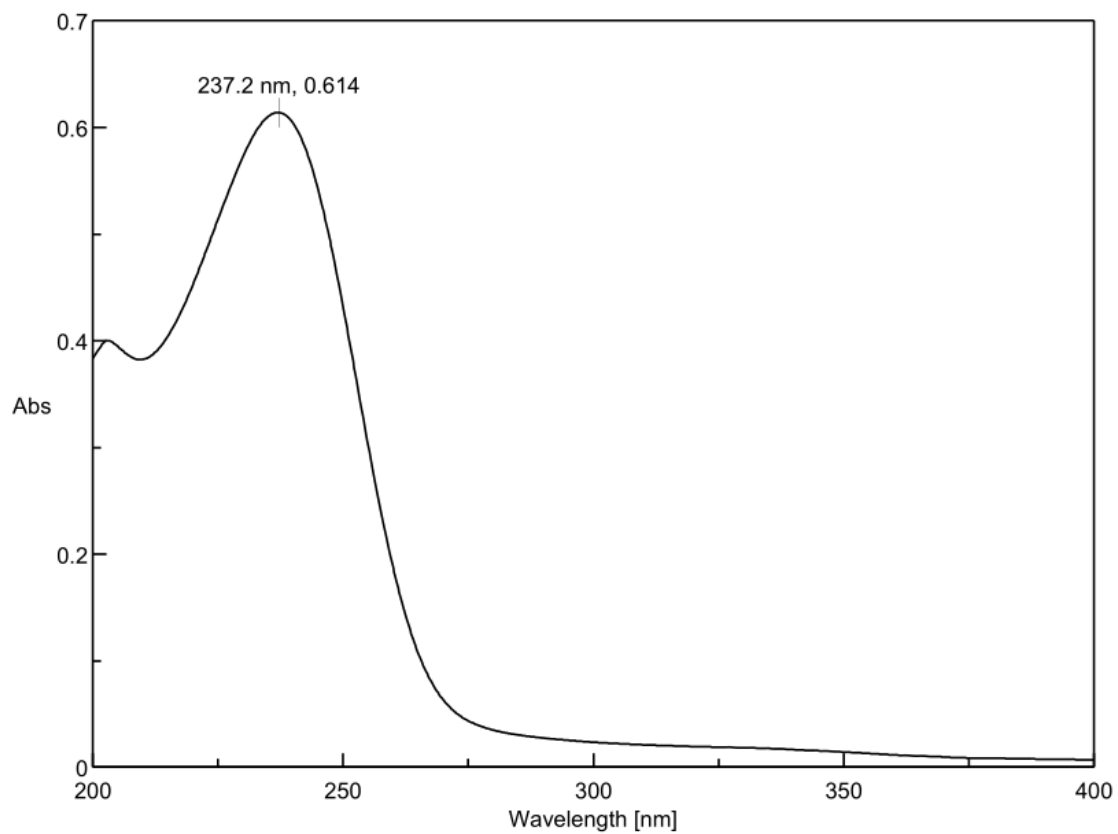

**Figure S57.** The UV spectrum of compound **6** in H<sub>2</sub>O

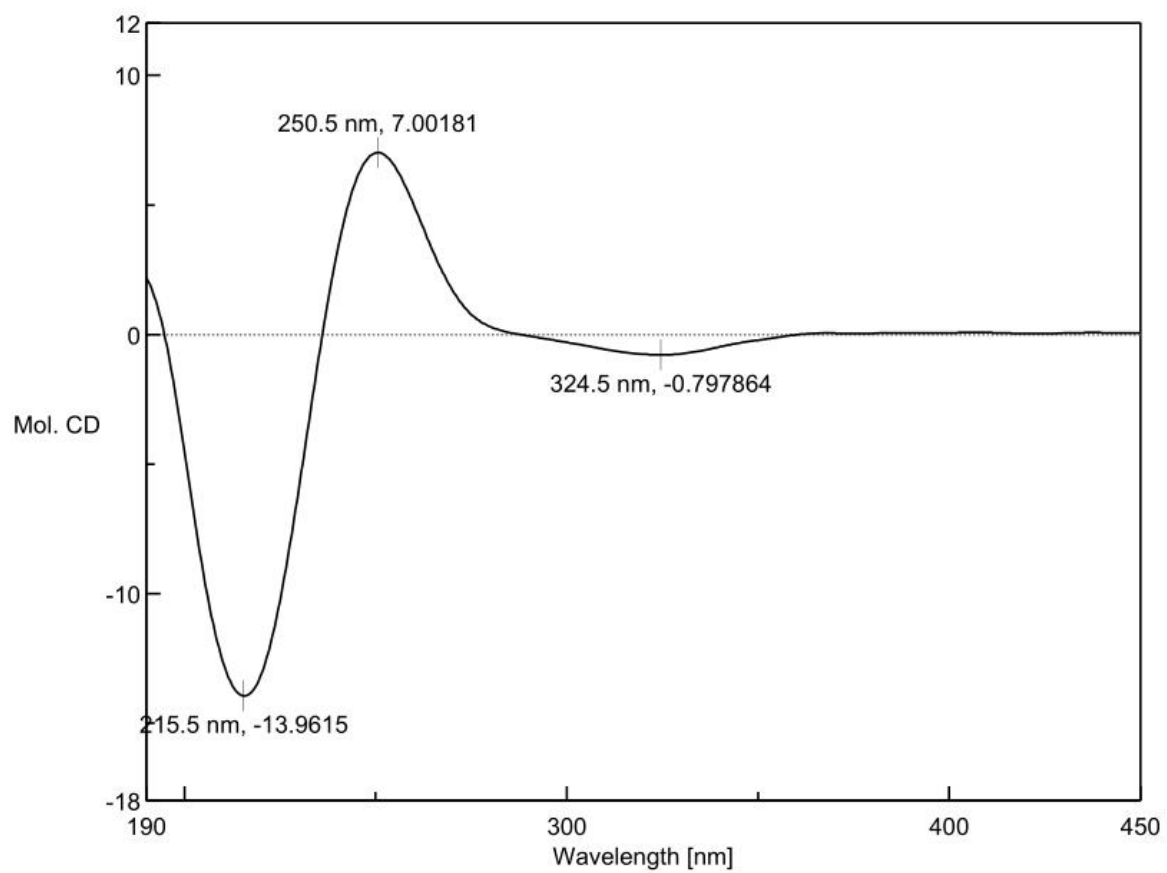

**Figure S58.** The ECD spectrum of compound **6** in H<sub>2</sub>O



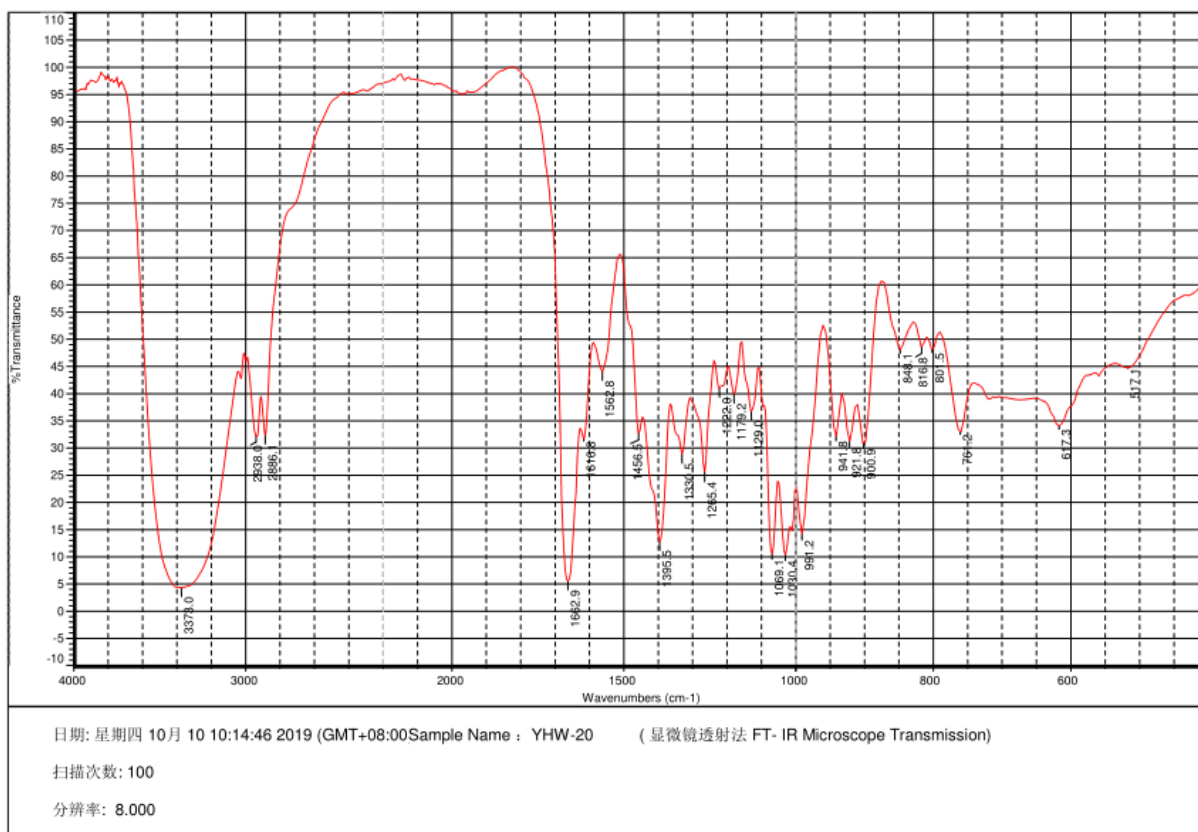

Figure S59. The IR spectrum of compound 6

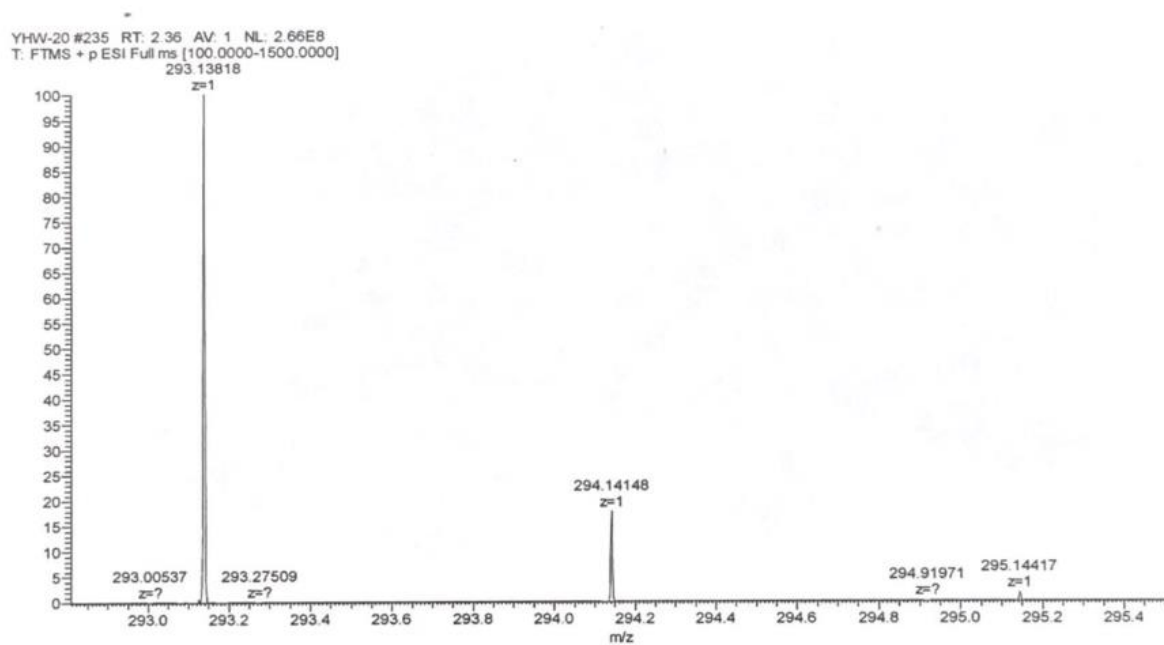

| m/z       | Theo. Mass | Delta (ppm) | RDB equiv. | Composition |     |
|-----------|------------|-------------|------------|-------------|-----|
| 293.13818 | 293.13835  | -0.58       | 6.5        | C16 H21 O5  | M+H |

Figure S60. The HR-ESI-MS data of compound 6

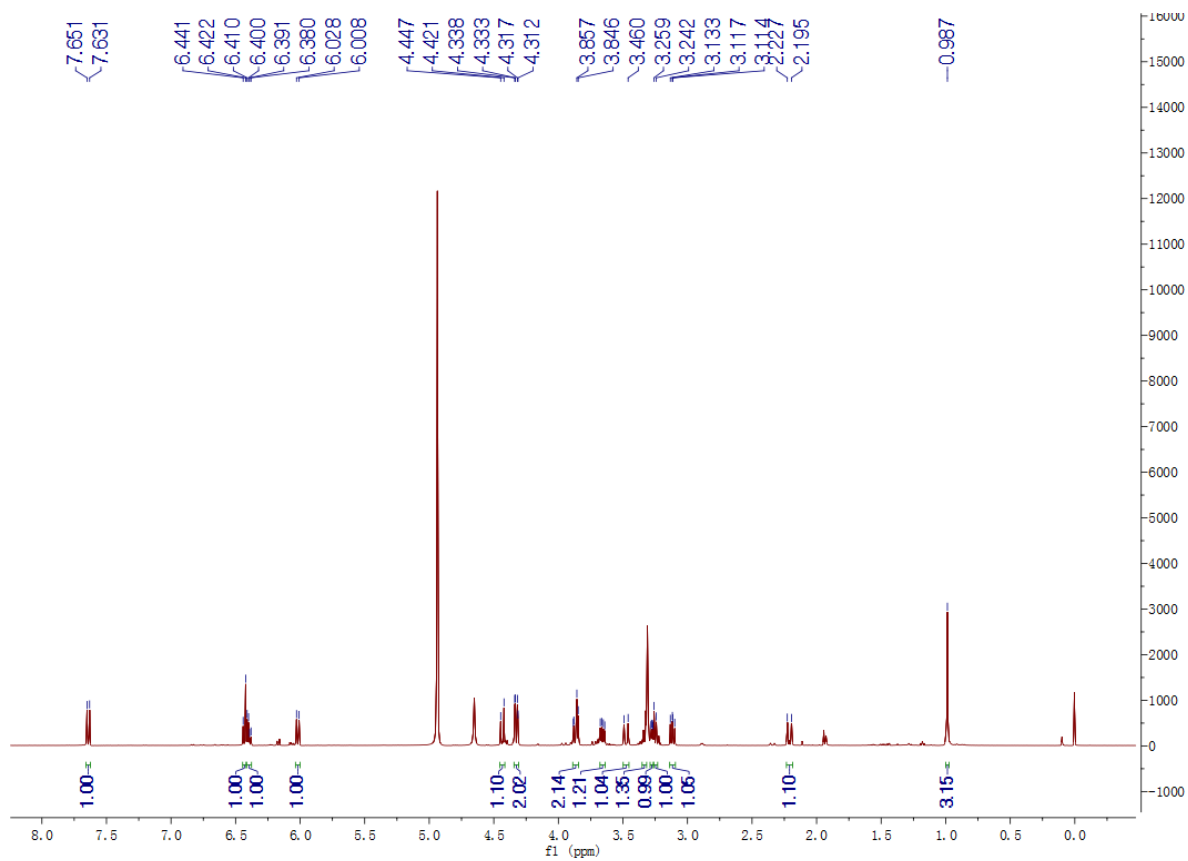

Figure S61. The  $^1\text{H}$  NMR spectrum of compound **7** in  $\text{CD}_3\text{OD}$

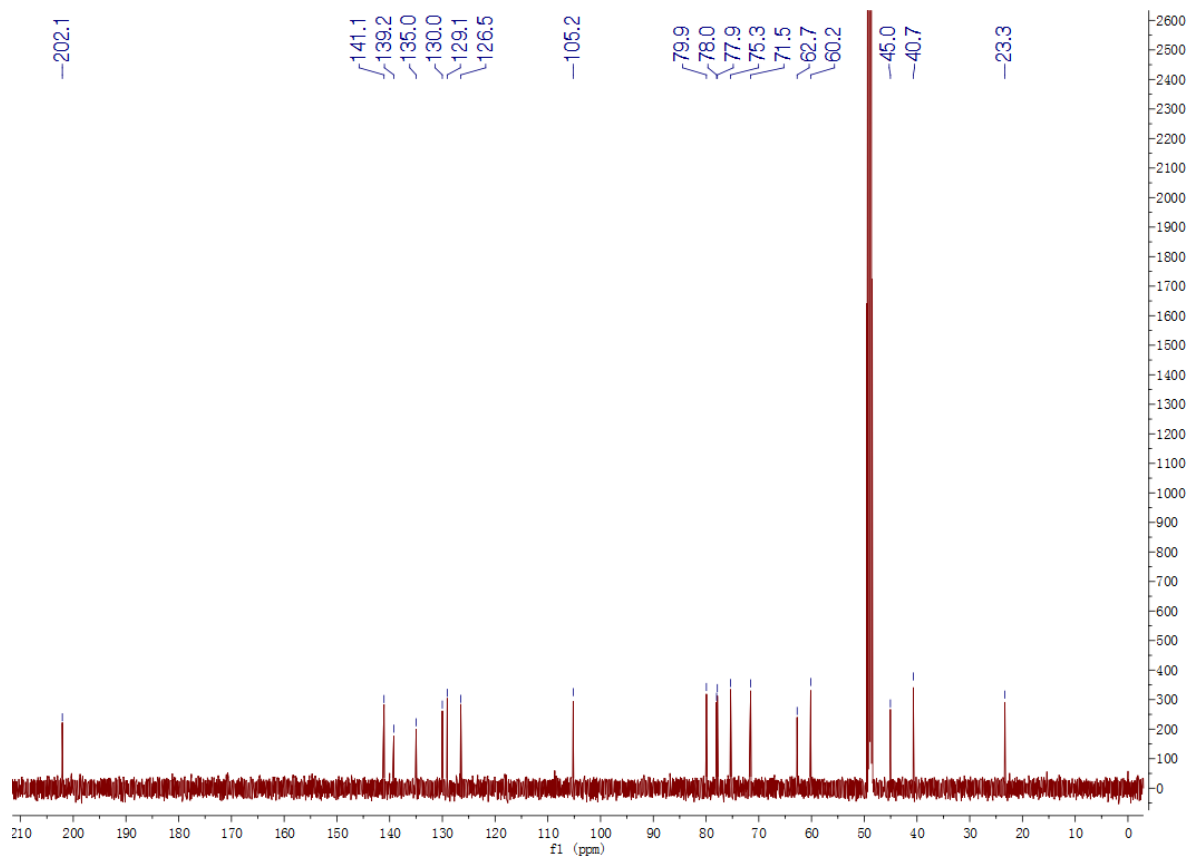

Figure S62. The  $^{13}\text{C}$  NMR spectrum of compound **7** in  $\text{CD}_3\text{OD}$

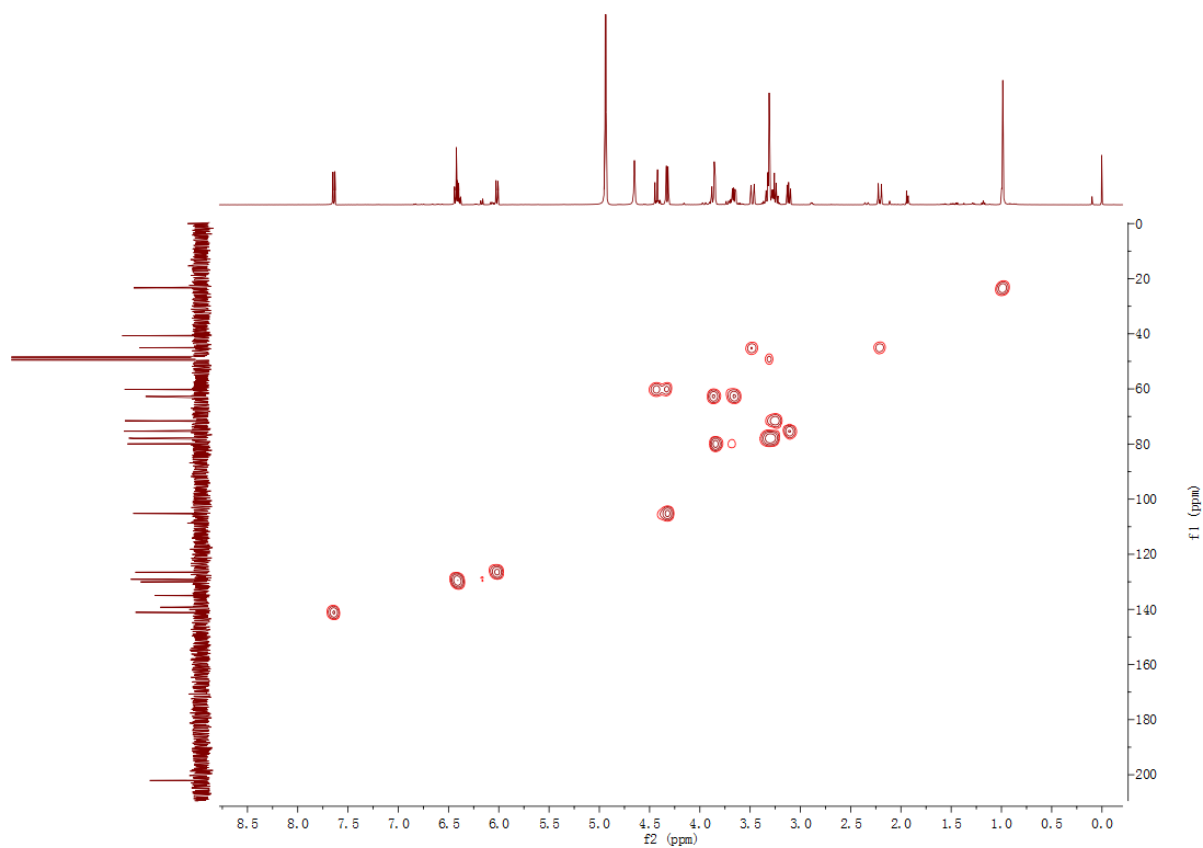

**Figure S63.** The HSQC spectrum of compound **7** in CD<sub>3</sub>OD

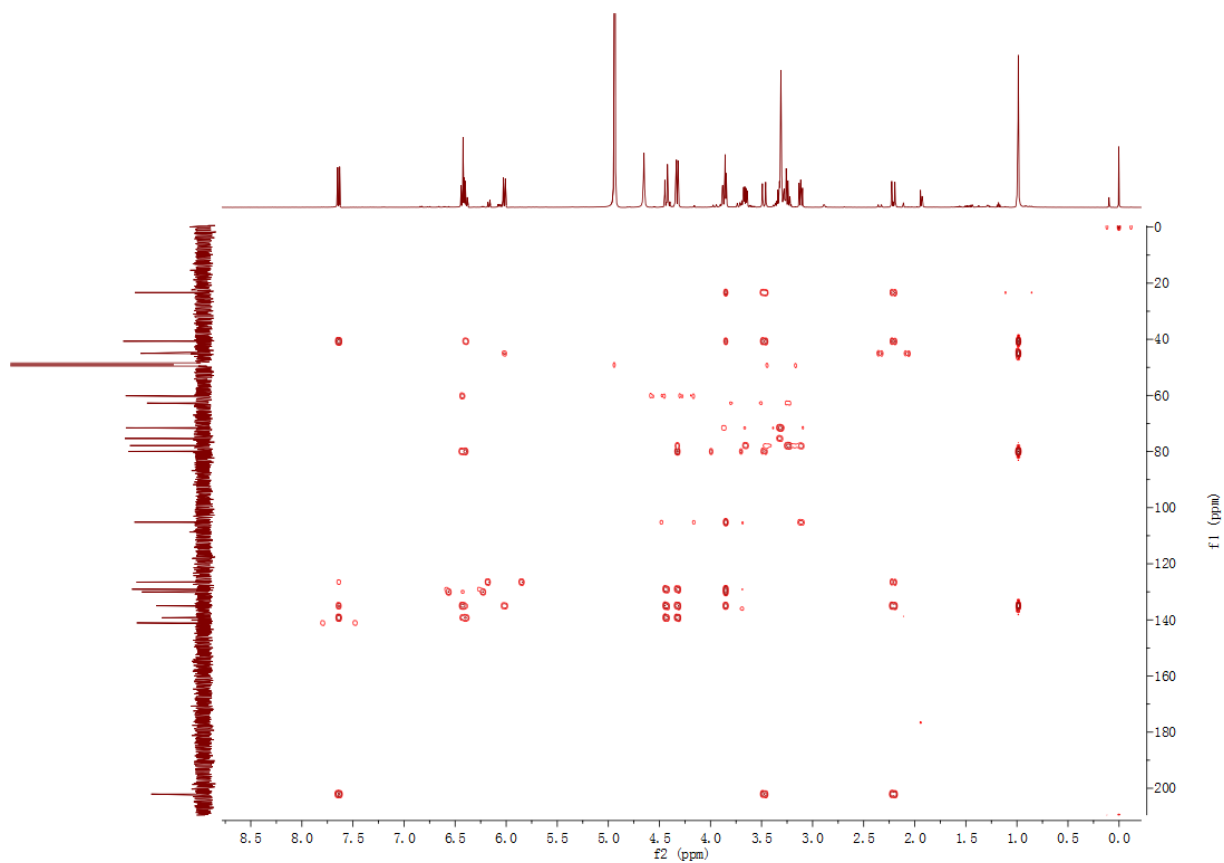

**Figure S64.** The HMBC spectrum of compound **7** in CD<sub>3</sub>OD

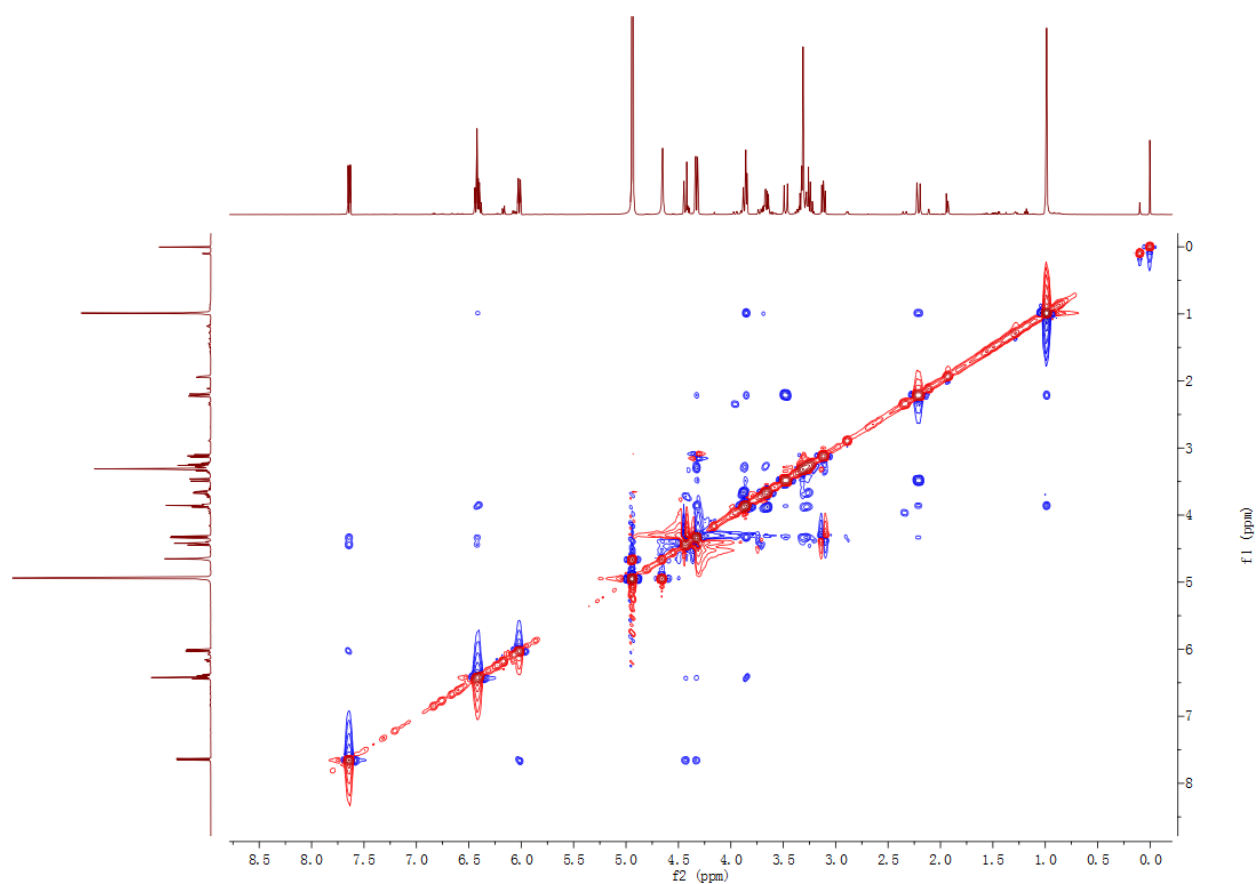

**Figure S65.** The ROESY spectrum of compound **7** in CD<sub>3</sub>OD

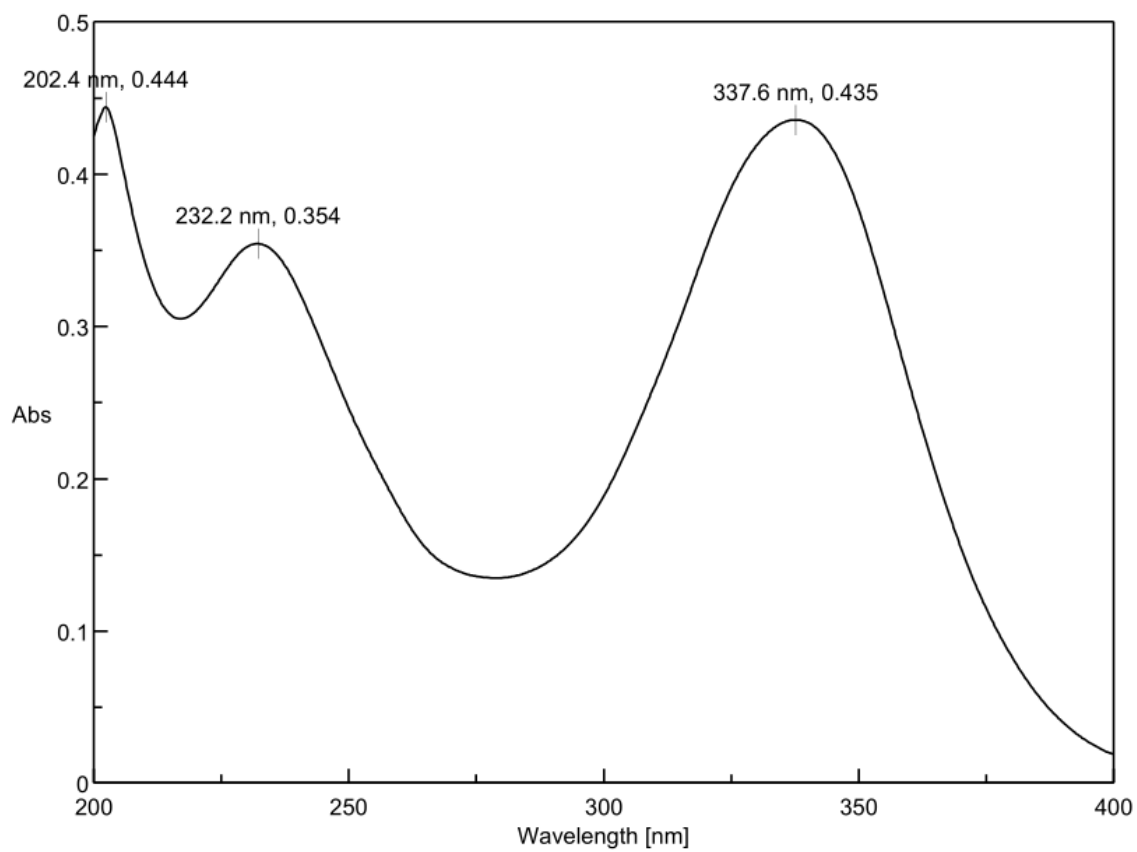

**Figure S66.** The UV spectrum of compound **7** in MeOH

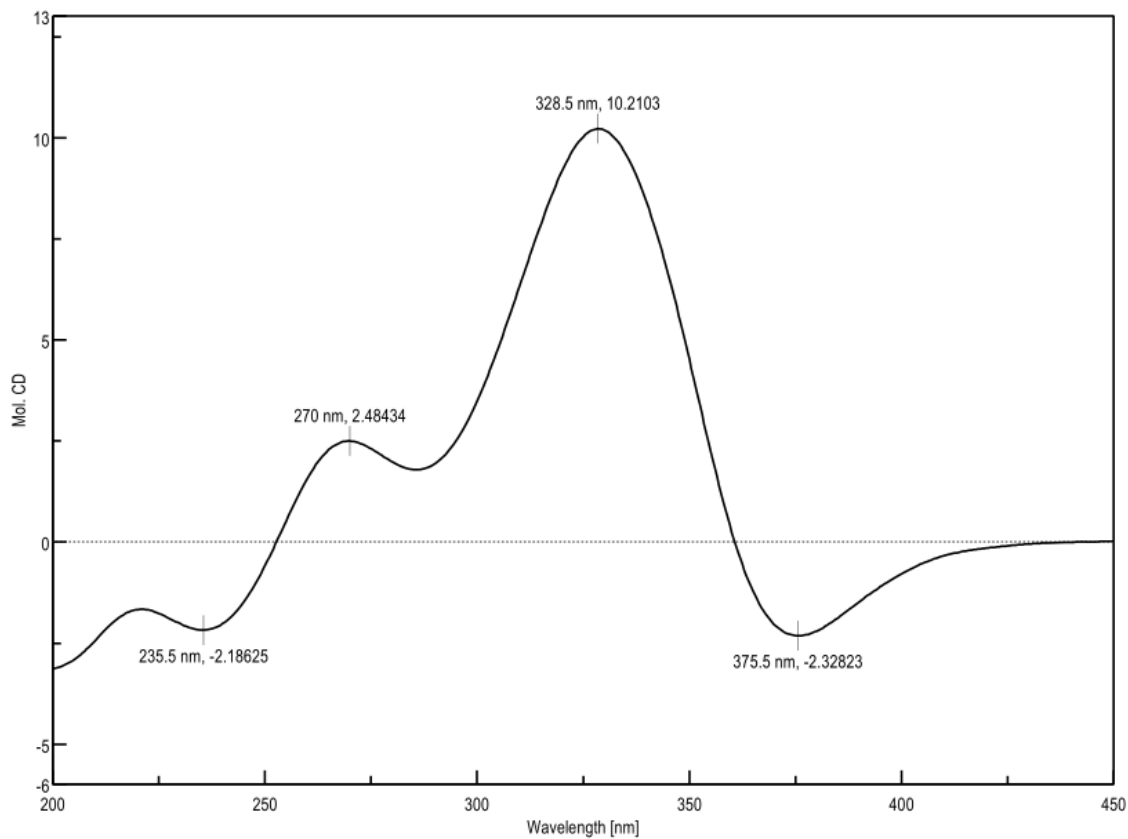

Figure S67. The ECD spectrum of compound 7 in MeOH

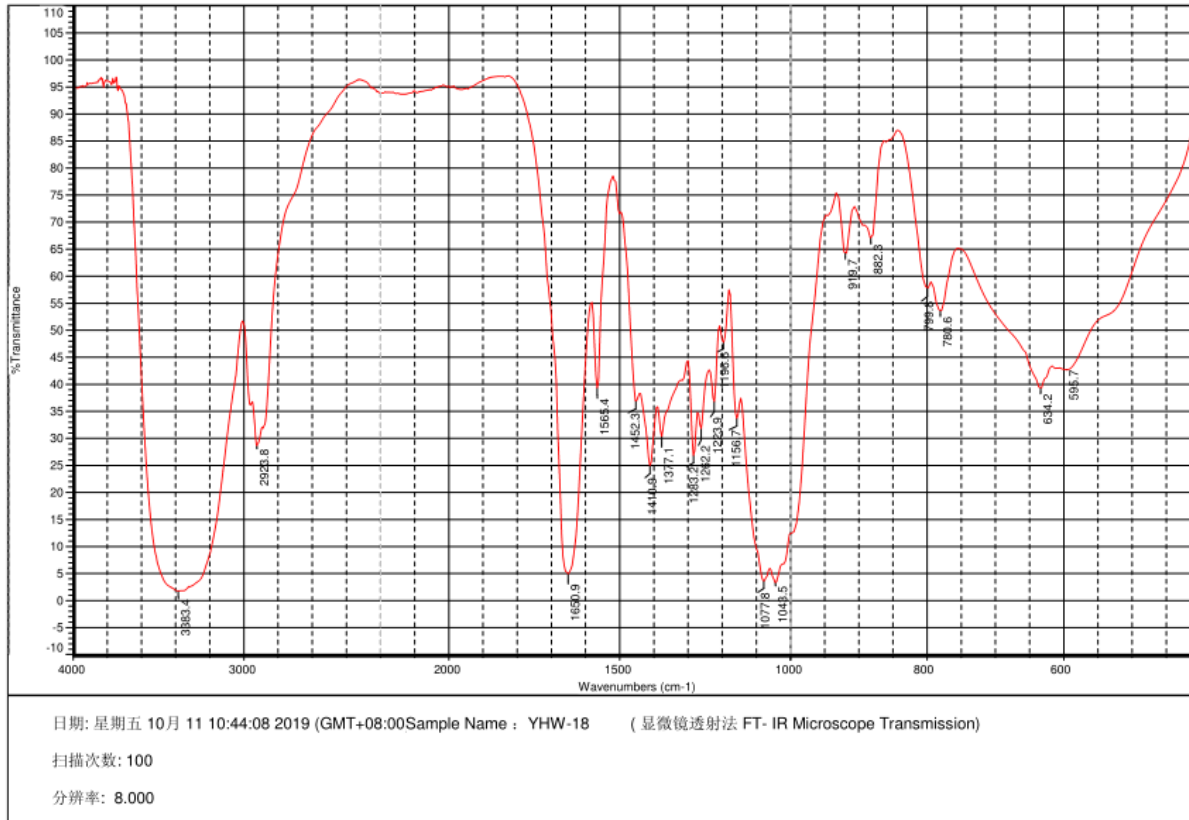

Figure S68. The IR spectrum of compound 7

YHW-18 #113 RT: 1.12 AV: 1 NL: 2.72E8  
 T: FTMS + p ESI Full ms [100.0000-1500.0000]

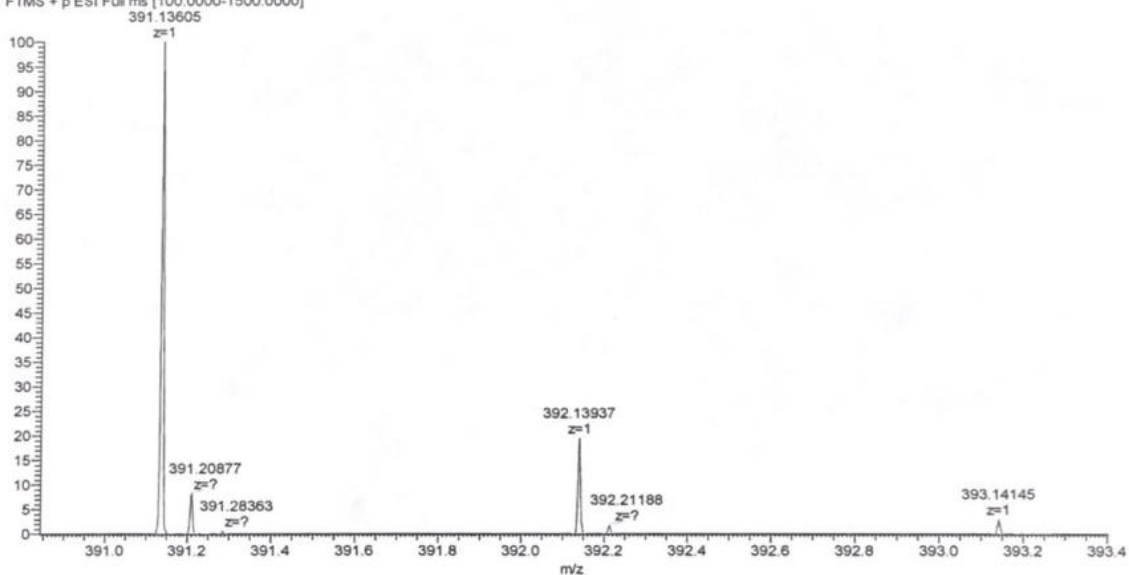

| m/z       | Theo. Mass | Delta (ppm) | RDB equiv. | Composition   |      |
|-----------|------------|-------------|------------|---------------|------|
| 391.13605 | 391.13634  | -0.74       | 6.5        | C18 H24 O8 Na | M+Na |

**Figure S69.** The HR-ESI-MS data of compound **7**

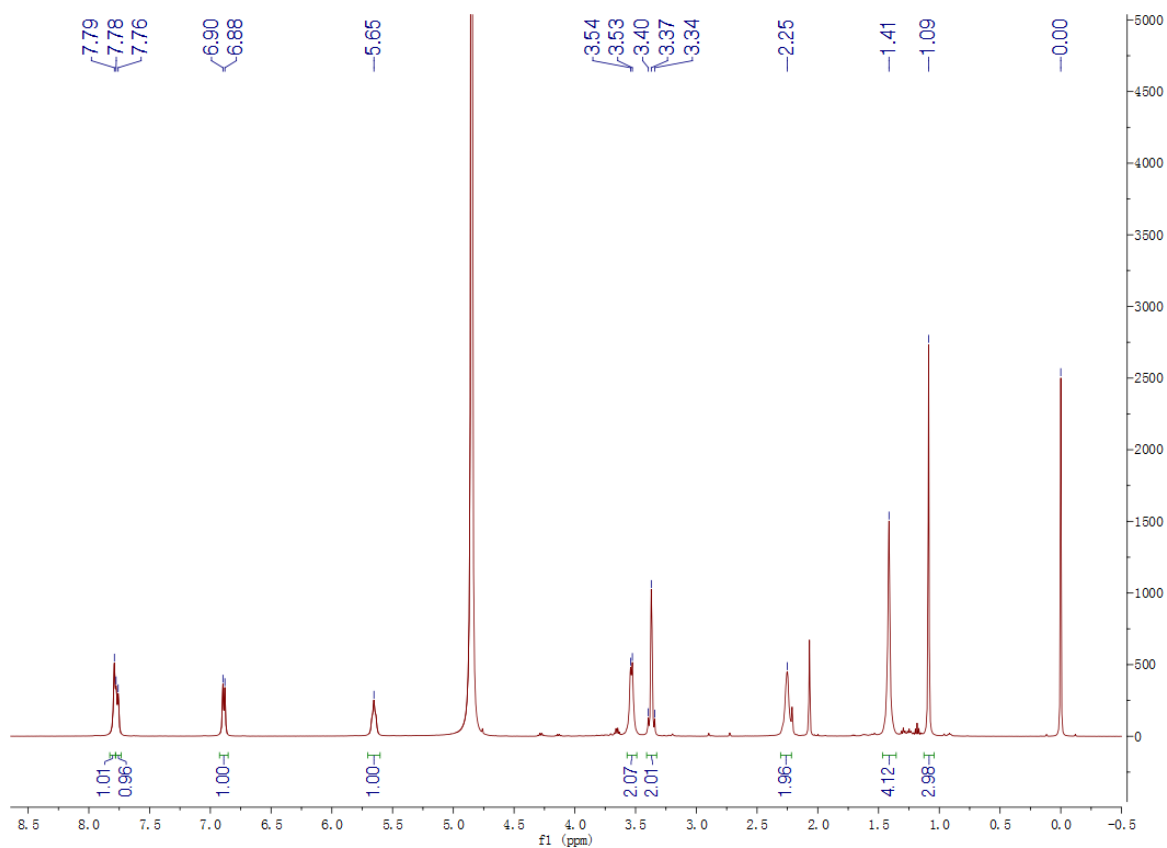

**Figure S70.** The  $^1\text{H}$  NMR spectrum of compound **8** in  $\text{D}_2\text{O}$

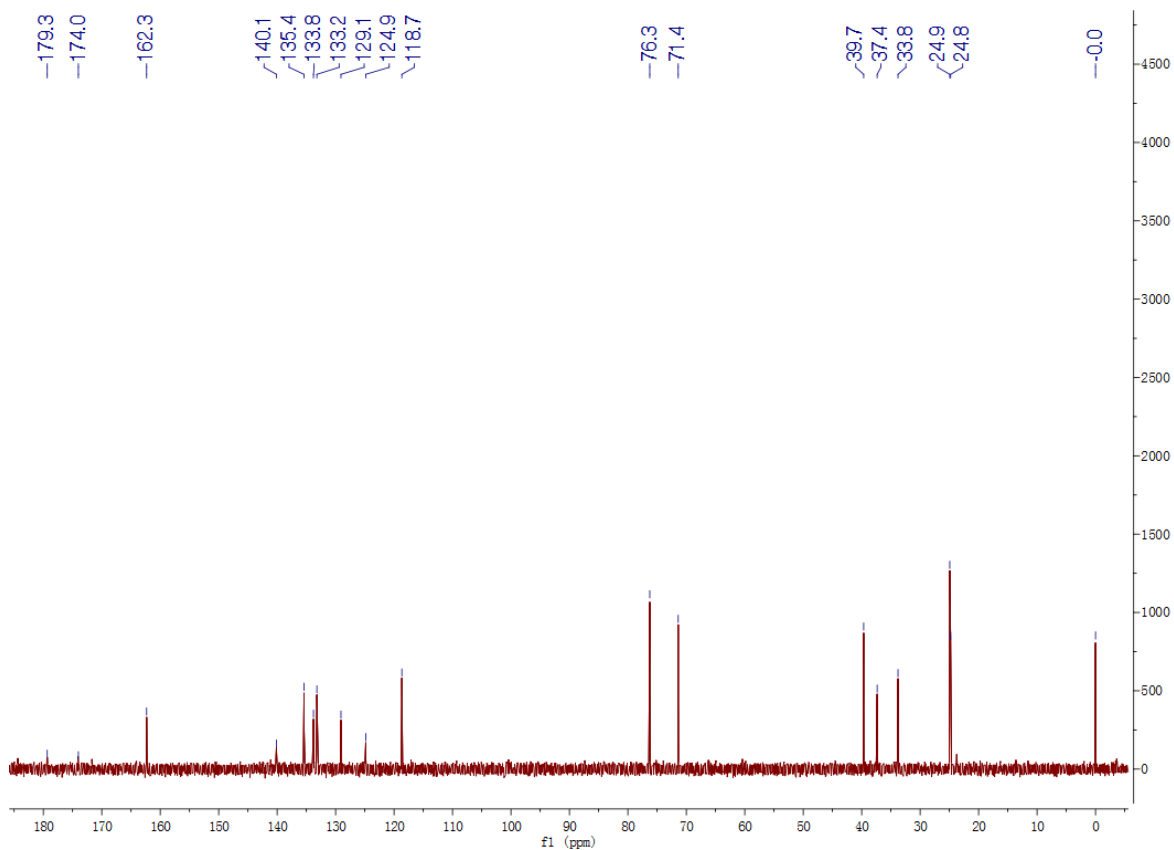

Figure S71. The  $^{13}\text{C}$  NMR spectrum of compound **8** in  $\text{D}_2\text{O}$

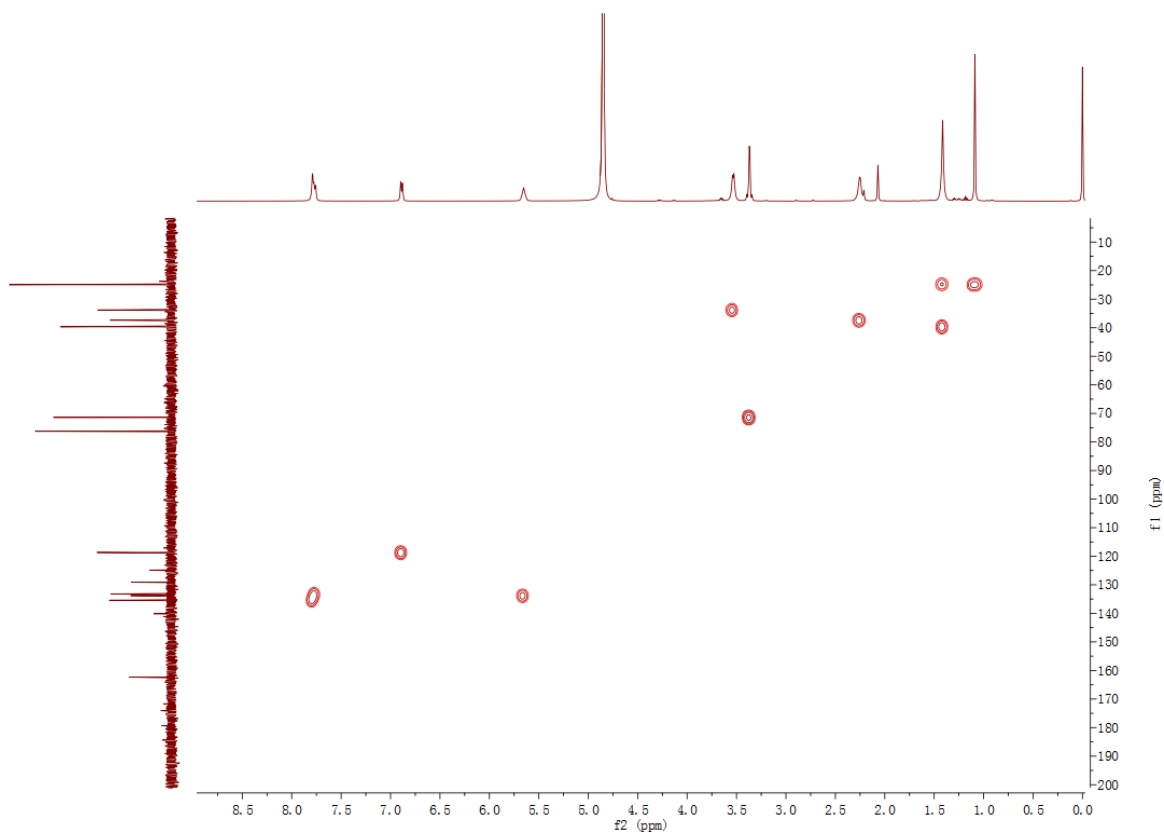

Figure S72. The HSQC spectrum of compound **8** in  $\text{D}_2\text{O}$

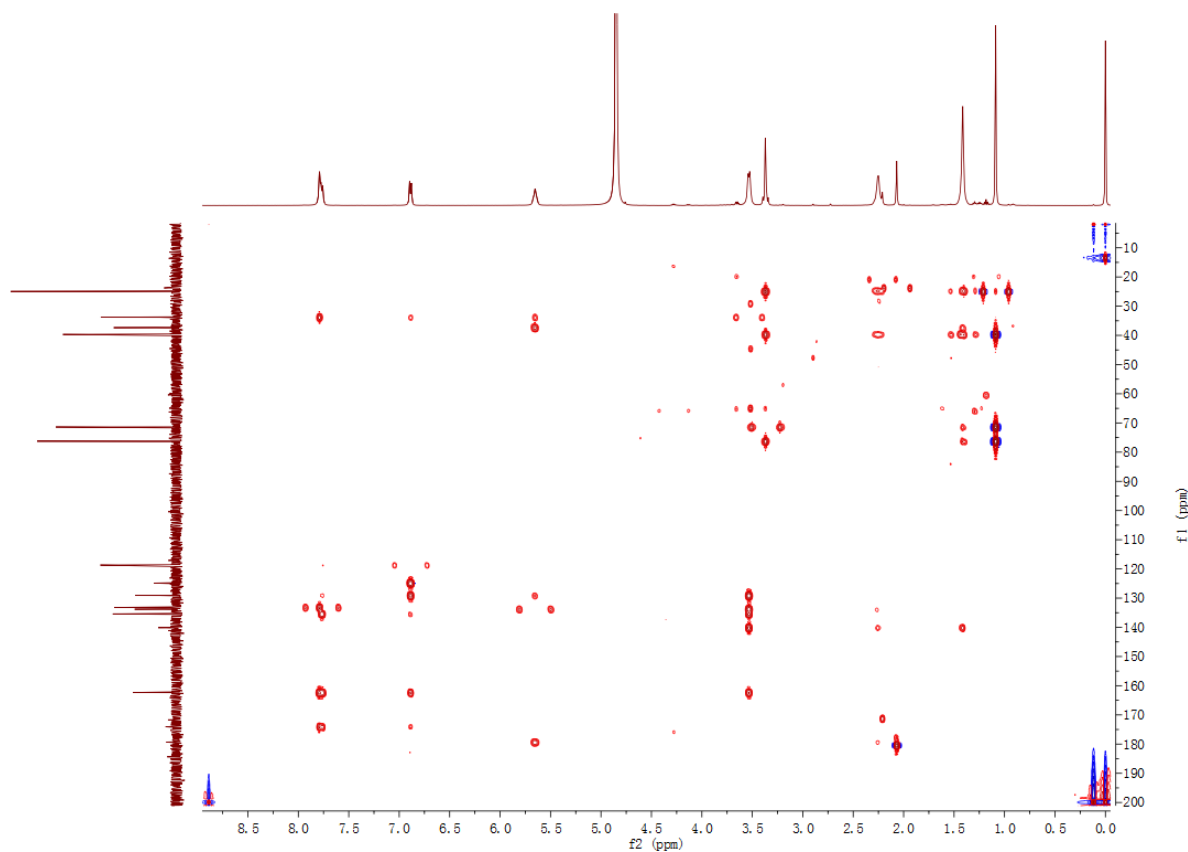

Figure S73. The HMBC spectrum of compound **8** in D<sub>2</sub>O

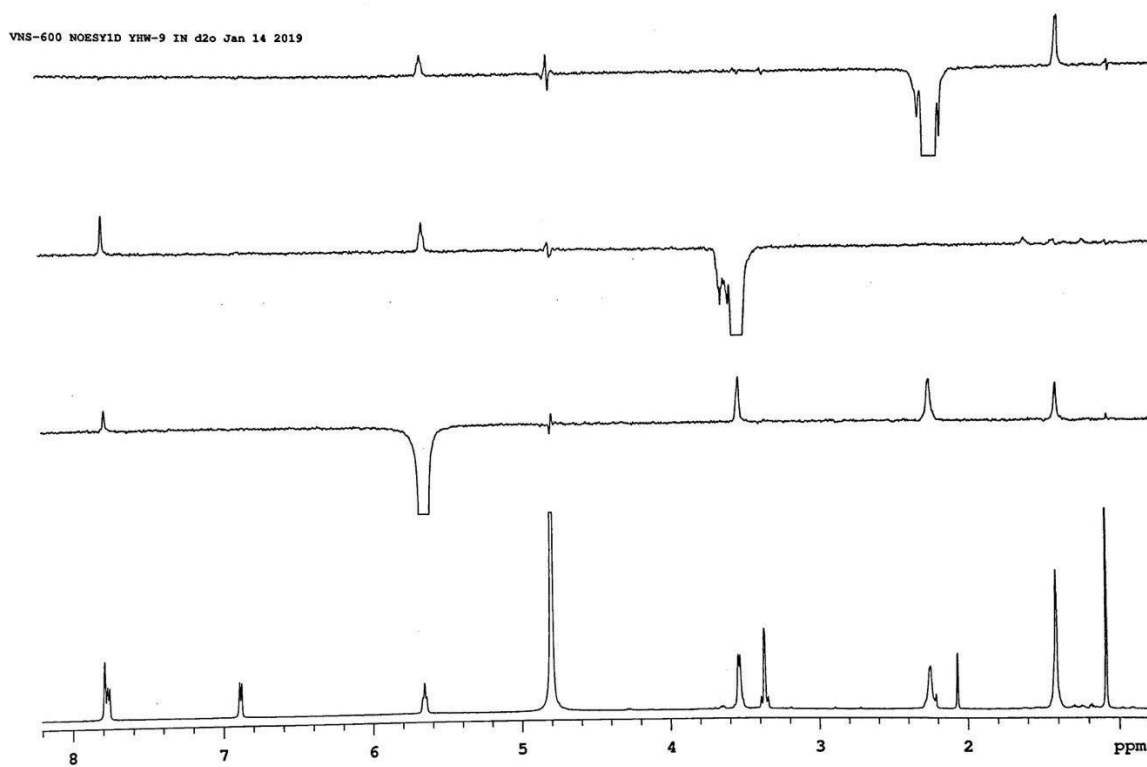

Figure S74. The 1D-NOESY spectrum of compound **8** in D<sub>2</sub>O



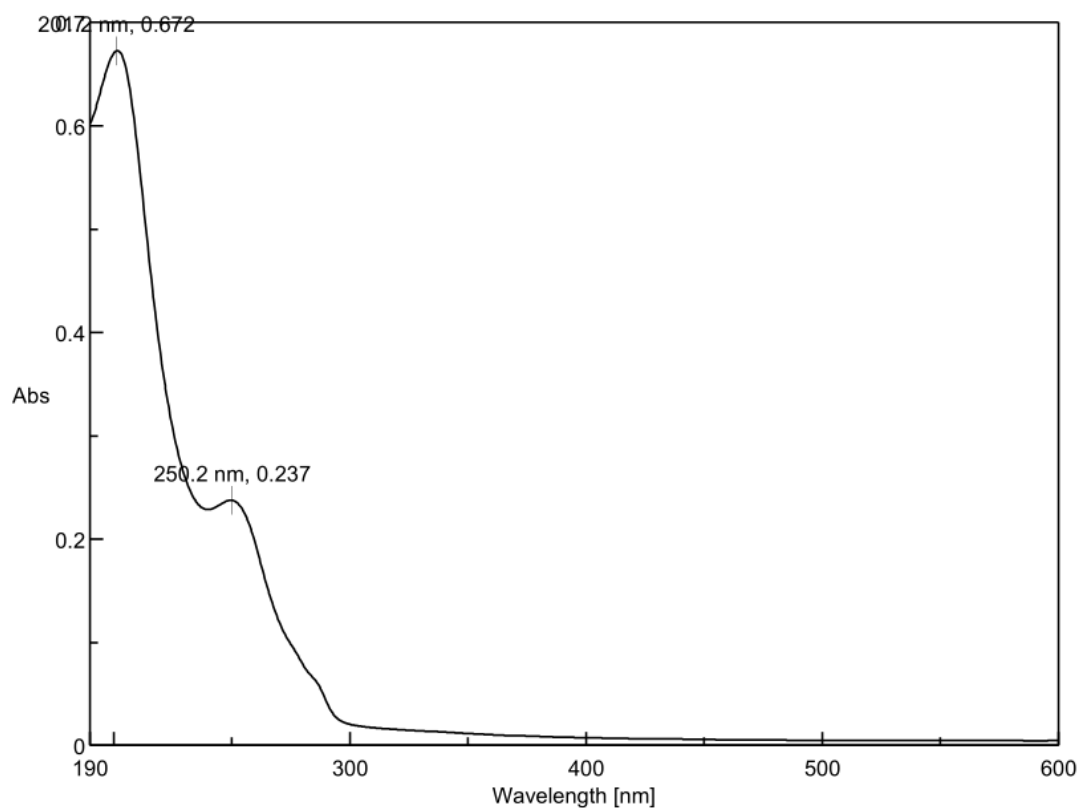

**Figure S75.** The UV spectrum of compound **8** in H<sub>2</sub>O

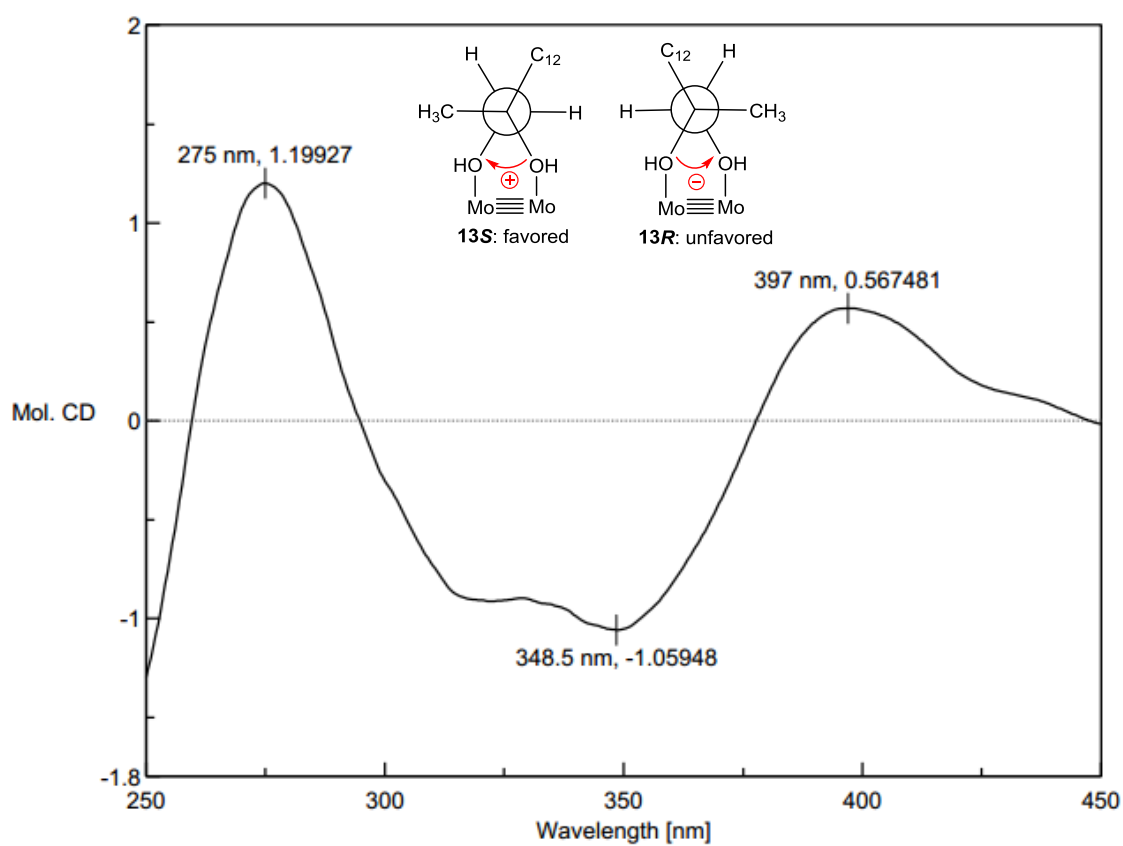

**Figure S76.** The [Mo<sub>2</sub>(OAc)<sub>4</sub>] induced ECD spectrum of compound **8** in DMSO

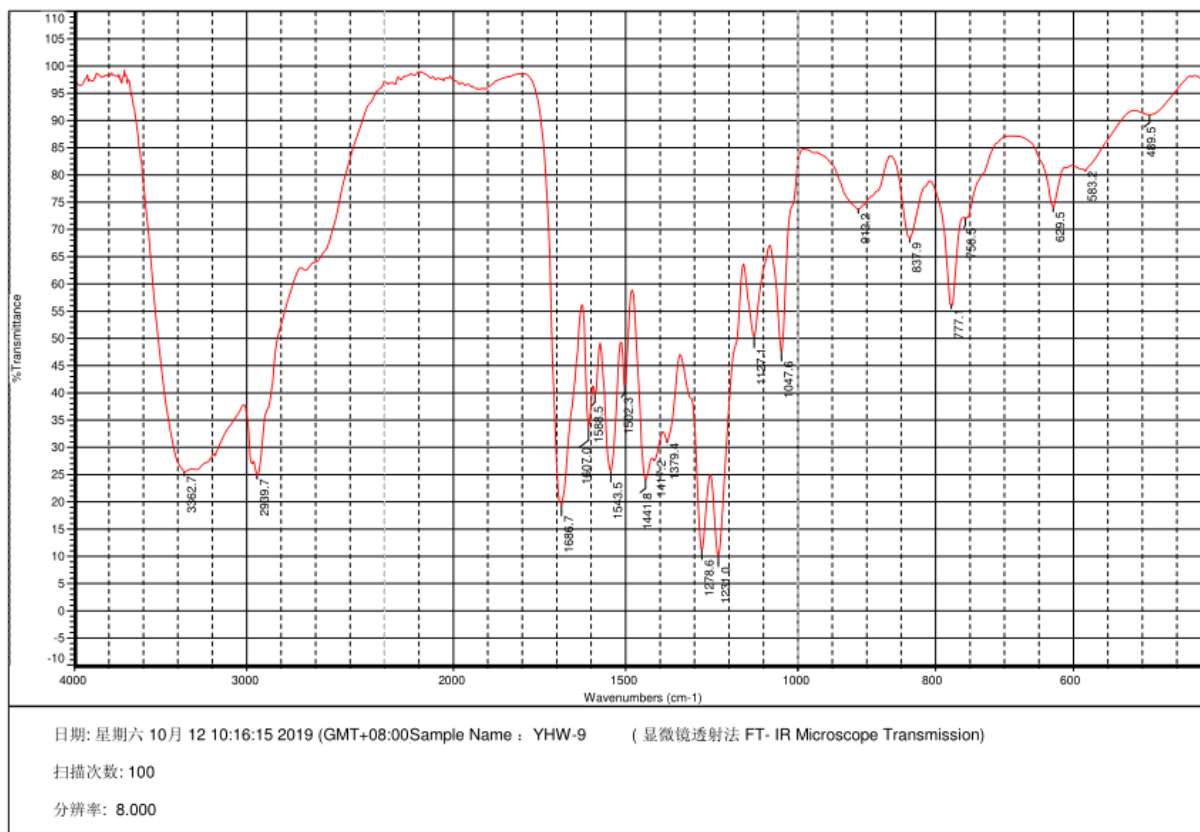

Figure S77. The IR spectrum of compound 8

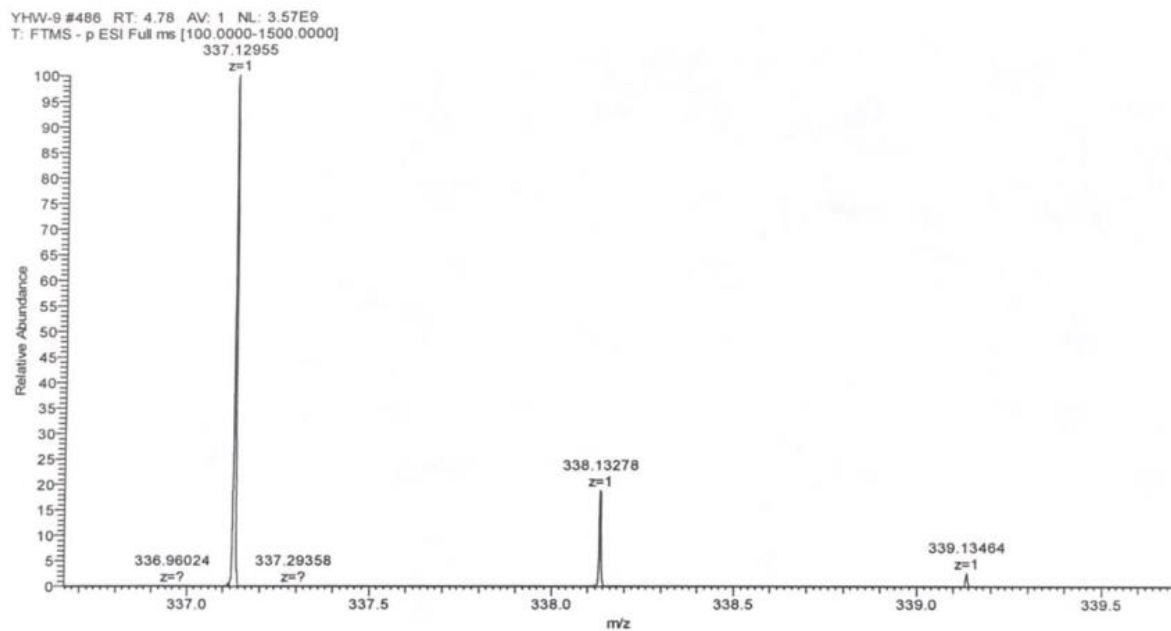

| m/z       | Theo. Mass | Delta (ppm) | RDB equiv. | Composition |     |
|-----------|------------|-------------|------------|-------------|-----|
| 337.12955 | 337.12928  | 0.81        | 7.5        | C17 H21 O7  | M-H |

Figure S78. The HR-ESI-MS data of compound 8

**Table S1. The cytotoxic activities of 1–8.**

| comp       | IC <sub>50</sub> (μM) |          |          |         |           |          |
|------------|-----------------------|----------|----------|---------|-----------|----------|
|            | PC9                   | BGC823   | HCT116   | HepG2   | HeLa      | U87-MG   |
| <b>1</b>   | >50                   | >50      | >50      | >50     | >50       | >50      |
| <b>2</b>   | 13.75                 | 17.96    | 19.82    | 23.70   | 25.89     | 29.29    |
| <b>3</b>   | >50                   | >50      | >50      | >50     | >50       | >50      |
| <b>4</b>   | >50                   | >50      | >50      | >50     | >50       | >50      |
| <b>5</b>   | >50                   | >50      | >50      | >50     | >50       | >50      |
| <b>6</b>   | >50                   | >50      | >50      | >50     | >50       | >50      |
| <b>7</b>   | >50                   | >50      | >50      | >50     | >50       | >50      |
| <b>8</b>   | >50                   | >50      | >50      | >50     | >50       | >50      |
| Paclitaxel | 0.0000245             | 0.000271 | 0.000109 | 0.00270 | 0.0000017 | 0.000793 |

**General Experimental Procedures.** The optical rotations were recorded on a JASCO P-2000 spectrometers (JASCO, Easton, MD, USA) at 20°C. UV and ECD spectra were measured on JASCO V-650 and JASCO J-815 spectrometers (JASCO, Easton, MD, USA), respectively. IR spectra were acquired on a Nicolet 5700 spectrometer utilizing an FT-IR microscope transmission method (Thermo Scientific, Waltham, MA, USA). 1D and 2D NMR spectra were obtained on a Bruker AVIII-500 spectrometer (Bruker-Biospin, Billerica, MA, USA). HRESIMS were conducted with an Agilent 6520 HPLC-Q-TOF mass spectrometer (Agilent Technologies, Waldbronn, Germany) with TMS as an internal standard. The reversed-phase semi-preparative HPLC was performed using a Shimadzu LC-10AT instrument equipped with a YMC-Pack ODS-A-HG column (250 mm × 10 mm, 5 μm; YMC Corp., Kyoto, Japan). Macroporous resin (Diaion HP-20, Mitsubishi Chemical Corp., Tokyo, Japan), RP-C<sub>18</sub> (50 μm, YMC Corp., Kyoto, Japan) and Sephadex LH-20 (Pharmacia Fine Chemicals, Uppsala, Sweden) were employed for column chromatography. The HPLC-DAD experiments were performed using an Agilent 1260 system with an Apollo C<sub>18</sub> column (250 × 4.6 mm, 5 μm, Alltech Corp., KY, US

**Determination of the Absolute Configuration of Sugar.** After enzymatic hydrolysis of compound **7**, the obtained monosaccharide residue was dissolved in anhydrous pyridine (1 mL), and L-cysteine methyl ester hydrochloride (2 mg) was added. Next, the mixture was heated in a water bath (60 °C) for 1 h. After the reaction solution was dried under vacuum, N-trimethylsilylimidazole (0.5 mL) was added, and the solution was heated in a water bath (60 °C) for 1 h and then extracted three times with H<sub>2</sub>O/*n*-hexane. Then, the *n*-hexane layer was analyzed using GC under following conditions: capillary column, HP-5 (30 m × 0.32 mm, Dikma); injection temperature, 300 °C; detector temperature (FID), 300 °C; start temperature, 200 °C, raised to 280 °C at a rate of 10 °C min<sup>-1</sup>, and the final temperature maintained for 30 min; and N<sub>2</sub> was used as the carrier gas. The absolute configuration of the sugar isolated from the hydrolysate of **7** was determined by comparing the retention time of its trimethylsilyl-L-cysteine derivative with that of authentic sugar prepared by a similar procedure.

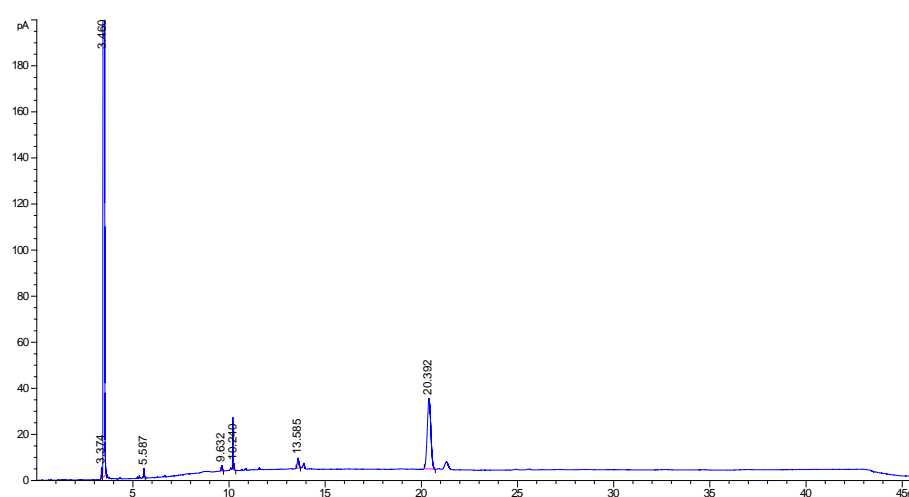

**Figure S79.** The Gas Chromatographic separation of D-Glu

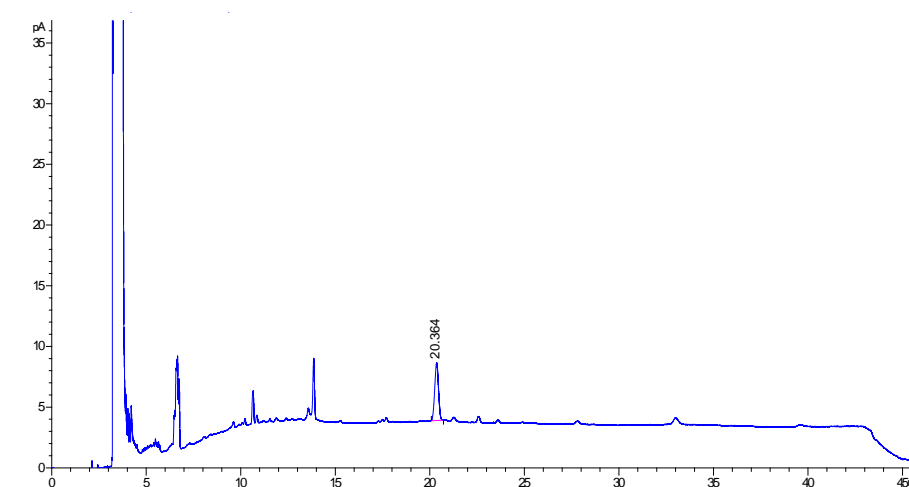

**Figure S80.** The Gas Chromatographic analysis of sugar moiety of compound **7**

**X-ray Crystallographic Analyses of 1, 3, 4 and 5.** Single-crystal X-ray diffraction data collection of compounds **1**, **3**, **4** and **5** were measured on a Rigaku Oxford Diffraction XtaLAB Synergy four-circle diffractometer equipped with a microfocus Cu  $K\alpha$  X-ray source (1.54184 Å, PhotonJet-R 1200W) and a HyPix-6000HE area detector. The sample crystal was cooled to 100K using a cold nitrogen stream (Cobra by Oxford Cryosystems). Data reduction, cell refinement and experimental absorption correction were performed in CrysAlisPro<sup>1</sup>. Structure solution, refinement, and data output were performed with the OLEX2 program package<sup>2</sup> using SHELXL-2014<sup>3</sup> for the refinement. Multi-scan method was used for the absorption correction. Structures were solved by direct methods and refined against  $F^2$  by full-matrix least-squares. All non-hydrogen atoms were refined anisotropically. Hydrogen atoms were generated geometrically at idealized position and constrained to ride on their parent. Crystallographic data for these compounds have been deposited at the Cambridge Crystallographic Data Centre with codes of 2015764 (**1**), 2015765 (**3**), 2015767 (**4**), 2015768 (**5**). Copies of these data can be obtained free of charge via the Internet at [www.ccdc.cam.ac.uk/conts/retrieving.html](http://www.ccdc.cam.ac.uk/conts/retrieving.html) or from the Cambridge Crystallographic Data Centre, 12 Union Road, 54 Cambridge CB2 1EZ, U.K. [Tel: (+44) 1223-336-408; fax: (+44) 1223-336-033; e-mail: deposit@ccdc.cam.ac.uk].

1. Agilent Technologies, CrysAlisPro, Version 1.171.37.35. Yarnton, Oxfordshire, United Kingdom, **2014**.
2. Dolomanov, O. V.; Bourhis, L. J.; Gildea, R. J.; Howard, J. A. K.; Puschmann, H. *J. Appl. Cryst.* **2009**, *42*, 339–341.
3. Sheldrick, G. M. *Acta Crystallogr. C*, **2015**, *71*, 3–8.

**ECD Calculations.** Systematic conformation searching of compound **6** was conducted in the Discovery Studio (version 16.1.0.15350) using the MMFF94 force field and only one conformer was obtained due to the rigidity of **6**. The conformational analyses of compound **7** was performed in the Discovery Studio via MMFF94s molecular mechanics force field, generating 21 conformers for 9*S*,10*R*-**7** and 19 conformers for 9*R*,10*S*-**7** because of the existence of a glucose moiety. Therefore, all the obtained conformers were further optimized by Spartan'14 software through MMFF94s molecular force field, giving one stable conformer for 9*S*,10*R*-**7** and two stable conformers for 9*R*,10*S*-**7**. These conformers were further optimized at the B3LYP/6-31+G (d, p) level in water for **6** and in methanol for **7** by the Gaussian 09 program (Gaussian Inc., Wallingford, CT, USA). The energies, oscillator strengths, and rotational strengths (velocity) of the first 50 electronic excitations were calculated using the time-dependent density functional theory at the B3LYP/6-31+g\* level in water for **6** and in methanol for **7**, respectively. Finally, the calculated ECD spectra were acquired through overlapping Gaussian function with the half-bandwidth of 0.35 eV for **6** and 0.25 eV for **7**, respectively. Good match of the calculated and experimental ECD spectra allowed their configurations assigned. The calculated preferential conformations are as follows:

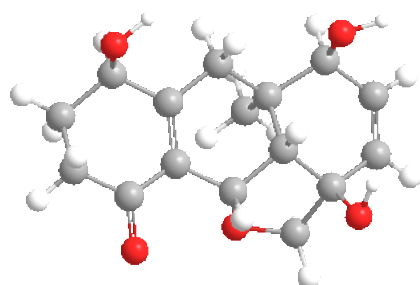

1*R*,6*S*,7*S*,8*R*,11*S*,12*R*-**6** (100%)

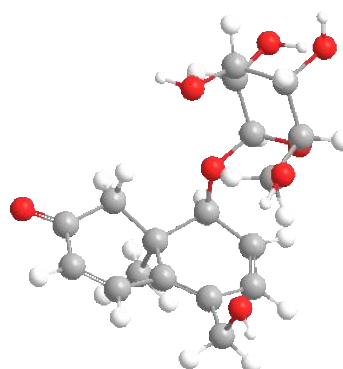

9*S*,10*R*-**7** (100%)

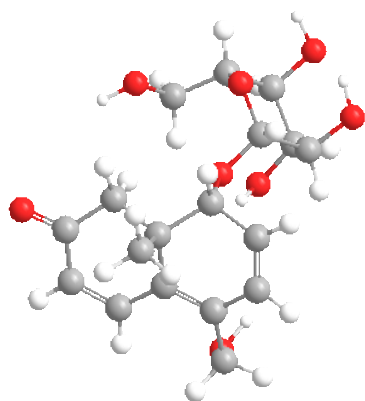

9*R*,10*S*-**7**-C1 (93.6%)

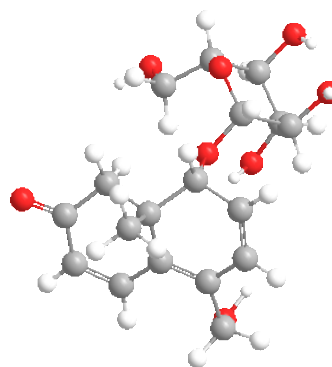

9*R*,10*S*-**7**-C2 (6.3%)

**Table S2.** Cartesian coordinates of the low-energy conformer of 1*R*,6*S*,7*S*,8*R*,11*S*,12*R*-6

| Conformer of 1 <i>R</i> ,6 <i>S</i> ,7 <i>S</i> ,8 <i>R</i> ,11 <i>S</i> ,12 <i>R</i> -6 |      |         |         |         | Conformer of 1 <i>R</i> ,6 <i>S</i> ,7 <i>S</i> ,8 <i>R</i> ,11 <i>S</i> ,12 <i>R</i> -6 |      |         |         |         |
|------------------------------------------------------------------------------------------|------|---------|---------|---------|------------------------------------------------------------------------------------------|------|---------|---------|---------|
| Number                                                                                   | Atom | X       | Y       | Z       | Number                                                                                   | Atom | X       | Y       | Z       |
| 1                                                                                        | C    | -3.9967 | 0.5421  | -0.0343 | 22                                                                                       | O    | 2.6032  | -2.5457 | 0.3248  |
| 2                                                                                        | C    | -3.9683 | -0.9857 | 0.1901  | 23                                                                                       | H    | 1.1537  | -0.8715 | 1.3768  |
| 3                                                                                        | C    | -2.6402 | -1.5264 | -0.1876 | 24                                                                                       | H    | -3.9246 | 0.7427  | -1.1093 |
| 4                                                                                        | C    | -1.4524 | -0.8091 | -0.0208 | 25                                                                                       | H    | -4.9451 | 0.9559  | 0.3245  |
| 5                                                                                        | C    | -1.5076 | 0.5457  | 0.4485  | 26                                                                                       | H    | -4.7728 | -1.4249 | -0.4010 |
| 6                                                                                        | C    | -2.8096 | 1.2184  | 0.6887  | 27                                                                                       | H    | -4.1654 | -1.2020 | 1.2476  |
| 7                                                                                        | C    | -0.1264 | -1.4775 | -0.2496 | 28                                                                                       | H    | -2.7629 | 2.2551  | 0.3393  |
| 8                                                                                        | C    | 1.0864  | -0.7046 | 0.2879  | 29                                                                                       | H    | -0.4330 | 2.3838  | 0.5630  |
| 9                                                                                        | C    | 0.9941  | 0.8425  | 0.0269  | 30                                                                                       | H    | -0.1259 | 1.2564  | 1.8725  |
| 10                                                                                       | C    | -0.2778 | 1.3253  | 0.7914  | 31                                                                                       | H    | 4.3291  | -0.9172 | -0.8874 |
| 11                                                                                       | C    | 2.2847  | -1.3611 | -0.4266 | 32                                                                                       | H    | 4.3990  | 1.2646  | -0.0439 |
| 12                                                                                       | C    | 3.4952  | -0.5213 | -0.5015 | 33                                                                                       | H    | 2.3727  | 2.5193  | 0.2639  |
| 13                                                                                       | C    | 3.5328  | 0.7680  | -0.0277 | 34                                                                                       | H    | 1.8272  | -2.8623 | -1.9944 |
| 14                                                                                       | C    | 2.3604  | 1.4484  | 0.5316  | 35                                                                                       | H    | 1.9365  | -1.2108 | -2.6115 |
| 15                                                                                       | O    | -2.6102 | -2.7432 | -0.5904 | 36                                                                                       | H    | -2.2598 | 1.6677  | 2.4998  |
| 16                                                                                       | O    | 0.1768  | -1.6713 | -1.6390 | 37                                                                                       | H    | -0.0701 | 0.8514  | -1.9315 |
| 17                                                                                       | C    | 1.6104  | -1.8171 | -1.7637 | 38                                                                                       | H    | 1.6807  | 0.9958  | -2.0812 |
| 18                                                                                       | O    | -3.0397 | 1.2230  | 2.0970  | 39                                                                                       | H    | 0.7334  | 2.3595  | -1.5321 |
| 19                                                                                       | C    | 0.8226  | 1.2757  | -1.4743 | 40                                                                                       | H    | 3.3985  | 1.5369  | 2.1909  |
| 20                                                                                       | O    | 2.4545  | 1.3785  | 1.9610  | 41                                                                                       | H    | 2.7868  | -2.2407 | 1.2438  |
| 21                                                                                       | H    | -0.1511 | -2.4624 | 0.2359  |                                                                                          |      |         |         |         |

**Table S3.** Cartesian coordinates of the low-energy conformers of 9*S*,10*R*-7 and 9*R*,10*S*-7

| Conformer of 9 <i>S</i> ,10 <i>R</i> -7    |      |         |         |         | Conformer of 9 <i>S</i> ,10 <i>R</i> -7    |      |         |         |         |
|--------------------------------------------|------|---------|---------|---------|--------------------------------------------|------|---------|---------|---------|
| Number                                     | Atom | X       | Y       | Z       | Number                                     | Atom | X       | Y       | Z       |
| 1                                          | C    | -3.3077 | 0.4315  | 2.3872  | 26                                         | O    | 0.3438  | 2.5557  | -2.5801 |
| 2                                          | C    | -3.1515 | -0.9970 | 2.0556  | 27                                         | H    | -4.3129 | 0.7787  | 2.5898  |
| 3                                          | C    | -1.8530 | -1.4277 | 1.4279  | 28                                         | H    | -1.7525 | -2.5141 | 1.5421  |
| 4                                          | C    | -0.6347 | -0.7090 | 2.0515  | 29                                         | H    | -1.9593 | -1.2151 | 0.3571  |
| 5                                          | C    | -0.8708 | 0.8178  | 2.1660  | 30                                         | H    | -2.4411 | 2.2969  | 2.5806  |
| 6                                          | C    | -2.2470 | 1.2465  | 2.3887  | 31                                         | H    | 0.9750  | -2.0590 | 1.4505  |
| 7                                          | C    | 0.6477  | -1.0428 | 1.1937  | 32                                         | H    | 2.7796  | -0.3982 | 1.2765  |
| 8                                          | C    | 1.7610  | -0.0740 | 1.4663  | 33                                         | H    | 2.3631  | 1.8491  | 2.0476  |
| 9                                          | C    | 1.5256  | 1.1734  | 1.8931  | 34                                         | H    | -0.7491 | 3.5188  | 2.8279  |
| 10                                         | C    | 0.1716  | 1.6839  | 2.0839  | 35                                         | H    | 0.9955  | 3.5905  | 2.6951  |
| 11                                         | O    | -4.0942 | -1.7672 | 2.2187  | 36                                         | H    | 0.0085  | 4.7258  | 1.0435  |
| 12                                         | C    | 0.0946  | 3.1874  | 2.2174  | 37                                         | H    | -0.2592 | -2.3391 | 3.4771  |
| 13                                         | O    | -0.0265 | 3.7623  | 0.9211  | 38                                         | H    | -1.2717 | -1.0554 | 4.1416  |
| 14                                         | O    | 0.3154  | -1.0165 | -0.1994 | 39                                         | H    | 0.4647  | -0.8045 | 3.9673  |
| 15                                         | C    | -0.4134 | -1.2539 | 3.4899  | 40                                         | H    | 1.9480  | -2.2414 | -0.5454 |
| 16                                         | C    | 1.3114  | -1.5247 | -1.0792 | 41                                         | H    | 2.4451  | 1.0269  | -2.8459 |
| 17                                         | O    | 2.1869  | -0.5008 | -1.5542 | 42                                         | H    | 0.3975  | 0.5375  | -4.2646 |
| 18                                         | C    | 1.5933  | 0.4588  | -2.4488 | 43                                         | H    | -0.2930 | -1.9190 | -4.1424 |
| 19                                         | C    | 0.9165  | -0.2140 | -3.6588 | 44                                         | H    | -0.0967 | -2.9819 | -1.8334 |
| 20                                         | C    | -0.0398 | -1.3415 | -3.2439 | 45                                         | H    | 1.2458  | 1.8898  | -0.8709 |
| 21                                         | C    | 0.6465  | -2.2888 | -2.2442 | 46                                         | H    | -0.2231 | 1.0315  | -1.3409 |
| 22                                         | C    | 0.6995  | 1.4729  | -1.7209 | 47                                         | H    | 1.5927  | -0.8444 | -5.3861 |
| 23                                         | O    | 1.9524  | -0.7976 | -4.4811 | 48                                         | H    | -1.8271 | -1.5513 | -2.4711 |
| 24                                         | O    | -1.2629 | -0.8066 | -2.7435 | 49                                         | H    | 2.2466  | -2.4364 | -3.3520 |
| 25                                         | O    | 1.6309  | -3.0790 | -2.9333 | 50                                         | H    | -0.1700 | 3.1649  | -2.0175 |
| Conformer of 9 <i>R</i> ,10 <i>S</i> -7-C1 |      |         |         |         | Conformer of 9 <i>R</i> ,10 <i>S</i> -7-C2 |      |         |         |         |
| 1                                          | C    | -3.2355 | 0.8256  | -2.2853 | 1                                          | C    | -3.2634 | 0.7801  | -2.2854 |
| 2                                          | C    | -3.1202 | -0.5524 | -1.9230 | 2                                          | C    | -3.1481 | -0.5978 | -1.9231 |
| 3                                          | C    | -1.8389 | -1.0521 | -1.3377 | 3                                          | C    | -1.8668 | -1.0977 | -1.3375 |
| 4                                          | C    | -0.5884 | -0.4050 | -2.0219 | 4                                          | C    | -0.6163 | -0.4504 | -2.0221 |
| 5                                          | C    | -0.7714 | 1.1010  | -2.1689 | 5                                          | C    | -0.7993 | 1.0555  | -2.1690 |
| 6                                          | C    | -2.1056 | 1.6314  | -2.3646 | 6                                          | C    | -2.1335 | 1.5859  | -2.3647 |
| 7                                          | C    | 0.7101  | -0.7620 | -1.1990 | 7                                          | C    | 0.6822  | -0.8075 | -1.1992 |
| 8                                          | C    | 1.8756  | 0.0839  | -1.5966 | 8                                          | C    | 1.8478  | 0.0383  | -1.5967 |
| 9                                          | C    | 1.6755  | 1.3865  | -2.0572 | 9                                          | C    | 1.6476  | 1.3410  | -2.0573 |
| 10                                         | C    | 0.3598  | 1.9442  | -2.1755 | 10                                         | C    | 0.3319  | 1.8987  | -2.1756 |
| 11                                         | O    | -4.0978 | -1.2962 | -2.0230 | 11                                         | O    | -4.1256 | -1.3417 | -2.0232 |
| 12                                         | C    | 0.2915  | 3.4255  | -2.3242 | 12                                         | C    | 0.2636  | 3.3799  | -2.3243 |



|    |   |         |         |         |
|----|---|---------|---------|---------|
| 13 | O | -0.2962 | 4.0014  | -1.1601 |
| 14 | O | 0.4850  | -0.5795 | 0.2107  |
| 15 | C | -0.4441 | -1.0259 | -3.4533 |
| 16 | C | 1.4962  | -1.1730 | 1.0472  |
| 17 | O | 0.9217  | -2.1522 | 1.9167  |
| 18 | C | 0.0909  | -1.6714 | 2.9914  |
| 19 | C | 0.7586  | -0.5291 | 3.8041  |
| 20 | C | 1.3520  | 0.5719  | 2.8882  |
| 21 | C | 2.2613  | -0.0690 | 1.8129  |
| 22 | C | -1.3381 | -1.3332 | 2.5082  |
| 23 | O | 1.8236  | -1.0915 | 4.5740  |
| 24 | O | 0.3239  | 1.4034  | 2.3297  |
| 25 | O | 3.4436  | -0.6182 | 2.4081  |
| 26 | O | -1.8337 | -2.3891 | 1.6930  |
| 27 | H | -4.1789 | 1.2340  | -2.4684 |
| 28 | H | -1.7769 | -2.1466 | -1.4107 |
| 29 | H | -1.8695 | -0.7993 | -0.2774 |
| 30 | H | -2.2453 | 2.6368  | -2.5711 |
| 31 | H | 0.9504  | -1.8212 | -1.3783 |
| 32 | H | 2.8444  | -0.2753 | -1.5053 |
| 33 | H | 2.5006  | 1.9473  | -2.3147 |
| 34 | H | 1.2826  | 3.8641  | -2.4534 |
| 35 | H | -0.3003 | 3.7159  | -3.2021 |
| 36 | H | 0.2263  | 3.6718  | -0.3962 |
| 37 | H | 0.4254  | -0.6247 | -3.9719 |
| 38 | H | -1.3227 | -0.8179 | -4.0647 |
| 39 | H | -0.3290 | -2.1112 | -3.3931 |
| 40 | H | 2.2224  | -1.7290 | 0.4521  |
| 41 | H | 0.0000  | -2.5173 | 3.6689  |
| 42 | H | 0.0330  | -0.0928 | 4.4951  |
| 43 | H | 1.9710  | 1.2208  | 3.5058  |
| 44 | H | 2.5753  | 0.7074  | 1.1169  |
| 45 | H | -1.3233 | -0.4131 | 1.9359  |
| 46 | H | -2.0207 | -1.2017 | 3.3493  |
| 47 | H | 1.5117  | -1.9677 | 4.8766  |
| 48 | H | 0.2195  | 1.1640  | 1.3818  |
| 49 | H | 3.1315  | -1.2133 | 3.1265  |
| 50 | H | -2.7266 | -2.1066 | 1.4037  |

|    |   |         |         |         |
|----|---|---------|---------|---------|
| 13 | O | -0.3241 | 3.9560  | -1.1603 |
| 14 | O | 0.4566  | -0.6256 | 0.2112  |
| 15 | C | -0.4720 | -1.0714 | -3.4534 |
| 16 | C | 1.4675  | -1.2184 | 1.0474  |
| 17 | O | 0.8913  | -2.1981 | 1.9150  |
| 18 | C | 0.0648  | -1.7154 | 2.9904  |
| 19 | C | 0.7333  | -0.5738 | 3.8020  |
| 20 | C | 1.3235  | 0.5267  | 2.8877  |
| 21 | C | 2.2342  | -0.1135 | 1.8098  |
| 22 | C | -1.3682 | -1.3817 | 2.5127  |
| 23 | O | 1.7949  | -1.1383 | 4.5790  |
| 24 | O | 0.2961  | 1.3577  | 2.3290  |
| 25 | O | 3.4186  | -0.6622 | 2.4021  |
| 26 | O | -2.2269 | -1.2261 | 3.6359  |
| 27 | H | -4.2068 | 1.1885  | -2.4685 |
| 28 | H | -1.8048 | -2.1921 | -1.4108 |
| 29 | H | -1.8975 | -0.8460 | -0.2763 |
| 30 | H | -2.2732 | 2.5913  | -2.5712 |
| 31 | H | 0.9225  | -1.8667 | -1.3785 |
| 32 | H | 2.8165  | -0.3207 | -1.5055 |
| 33 | H | 2.4727  | 1.9018  | -2.3149 |
| 34 | H | 1.2547  | 3.8186  | -2.4535 |
| 35 | H | -0.3282 | 3.6703  | -3.2022 |
| 36 | H | 0.1984  | 3.6263  | -0.3963 |
| 37 | H | 0.3975  | -0.6702 | -3.9720 |
| 38 | H | -1.3507 | -0.8634 | -4.0648 |
| 39 | H | -0.3569 | -2.1567 | -3.3932 |
| 40 | H | 2.1938  | -1.7748 | 0.4516  |
| 41 | H | -0.0262 | -2.5625 | 3.6701  |
| 42 | H | 0.0056  | -0.1384 | 4.4953  |
| 43 | H | 1.9430  | 1.1754  | 3.5058  |
| 44 | H | 2.5470  | 0.6623  | 1.1168  |
| 45 | H | -1.7366 | -2.1961 | 1.8910  |
| 46 | H | -1.3965 | -0.4642 | 1.9304  |
| 47 | H | 2.5594  | -1.2110 | 3.9707  |
| 48 | H | 0.1914  | 1.1185  | 1.3820  |
| 49 | H | 3.8819  | -1.1459 | 1.6957  |
| 50 | H | -3.1169 | -1.0421 | 3.2686  |
